# Supplementary material for: Copper-catalyzed remote asymmetric yne-allylic substitution: construction of thiazolone derivatives with adjacent chiral centers
Source: Royal Society of Chemistry journal article supplement (doi:10.1039/d4qo01491j), 2024-01-01

## Supporting Information

### **Copper-Catalyzed Remote Asymmetric Yne-Allylic Substitution: Construction of Thiazolidinone Derivatives with Consecutive Chiral Centers**

Zi-Han Wang<sup>a</sup>, Jia-Run Wang<sup>a</sup>, Ying-Ying Wei<sup>a</sup>, Bing Liu<sup>\*b</sup> and Tao-Yan Lin<sup>\*a</sup>

<sup>a</sup>Key Laboratory of Green and Precise Synthetic Chemistry and Applications, Ministry of Education, School of Chemistry and Materials Science, Huaibei Normal University, Huaibei, Anhui 235000, P. R. China

Email: liny@chnu.edu.cn

<sup>b</sup>Research Institute for Doping Analyses, Shanghai University of Sport, Shanghai 200438, P. R. China  
Email: liubing2019@sus.edu.cn

## Contents

|                                                                                                                                      |     |
|--------------------------------------------------------------------------------------------------------------------------------------|-----|
| 1. General Information.....                                                                                                          | S3  |
| 2. General Procedure for the Synthesis of the yne-allylic esters 1 .....                                                             | S4  |
| 3. General Procedure for the Synthesis of thiazolidinones 2.....                                                                     | S5  |
| 4. General Procedure for Copper-Catalyzed Remote Asymmetric Yne-allylic Substitution of Yne-Allylic Esters with thiazolidinones..... | S6  |
| 5. Gram-scale reaction and synthetic transformations of the chiral product 3a.....                                                   | S37 |
| 6. References.....                                                                                                                   | S44 |
| 7. Crystal Structure of ( <i>S,R</i> )-3a.....                                                                                       | S45 |
| 8. <sup>1</sup> H, <sup>13</sup> C and <sup>19</sup> F NMR Spectra for New Compounds.....                                            | S54 |

## 1. General Information

All air- and moisture-sensitive manipulations were carried out with standard Schlenk techniques under nitrogen or in a glove box under nitrogen.  $^1\text{H}$  NMR,  $^{13}\text{C}$  NMR spectra were measured at 600 MHz and 151 MHz in  $\text{CDCl}_3$  using TMS signal ( $\delta$  0.00 ppm) and the residual signals from  $\text{CHCl}_3$ : ( $\delta$  = 7.26 ppm for  $^1\text{H}$ ,  $\delta$  = 77.00 ppm for  $^{13}\text{C}$ ) as internal references for  $^1\text{H}$  and  $^{13}\text{C}$  NMR respectively. Data for  $^1\text{H}$  NMR spectra are reported as follows: chemical shift ( $\delta$ , ppm), multiplicity (s = singlet, d = doublet, t = triplet, q = quartet, dd = doublet of doublets, dt = doublet of triplets, qd = quartet of doublets, ddd = doublet of doublet of doublets, m = multiplet), coupling constant (Hz), and integration. High resolution mass spectra were acquired by Agilent 6545 Accurate-Mass Q-TOF LC/MS System. Melting points were determined on a WRS-1B digital melting point apparatus. The er value was determined by HPLC with a chiral stationary phase. Reactions were monitored by thin layer chromatography (TLC) using silica gel plates. Flash column chromatography was performed over silica gel (300-400 mesh). X-ray Crystallography was collected at 173 K on a CCD area detector (Supernova Dual Source, Cu at Zero equipped with an AtlasS2 diffractometer or XtaLAB AFC12 (RINC): Kappa single diffractometer) using  $\text{Cu K}\alpha$  radiation. The substrates **1** and **2** were synthesized according to published procedures. The spectral data of the substrates were consistent with that reported in the literature. All other chemicals and solvents were purchased from commercial company and used as received.

## 2. General Procedure I: the Synthesis of yne-allylic esters 1

The yne-allylic esters **1** were prepared according to the literatures,<sup>[1]</sup> and all the spectra data are in agreement with the reports.

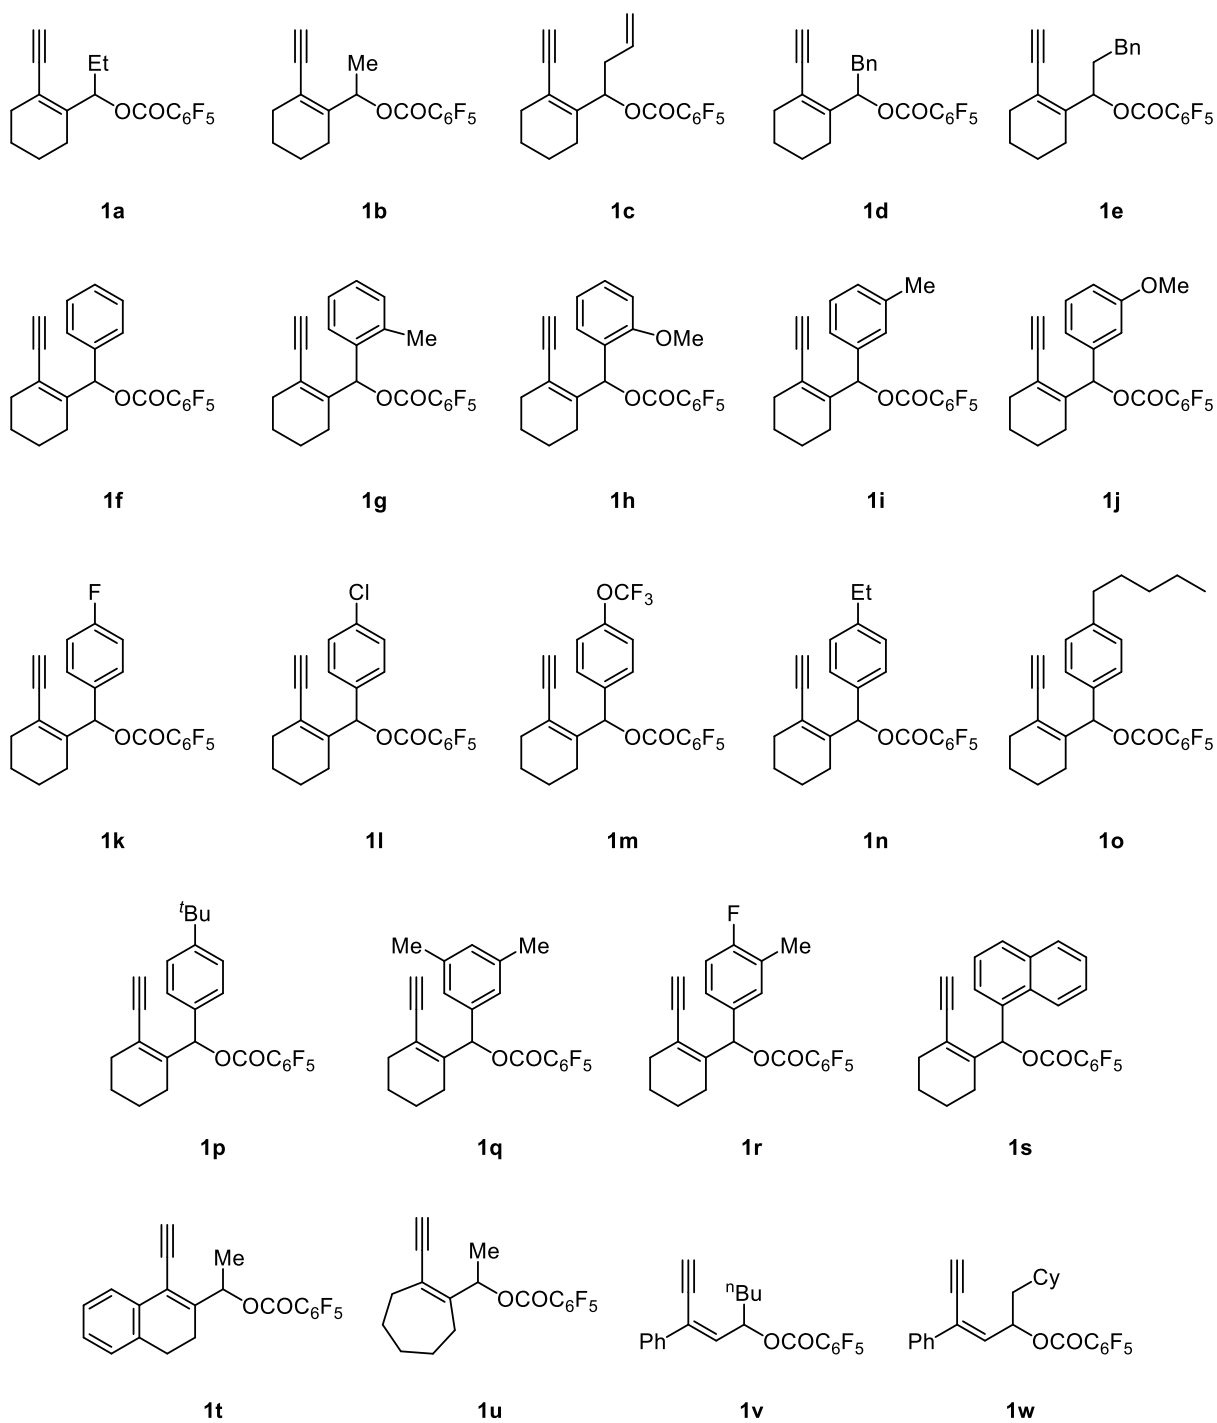

Figure S1. The summary of yne-allylic esters **1**

### 3. General Procedure II: the Synthesis of thiazolidinones **2**

The thiazolidinones **2** were prepared according to the literatures,<sup>[2]</sup> and all the spectra data are in agreement with the reports. The new compound **2f** was prepared by the literature method and the spectra data is shown in this supporting information.

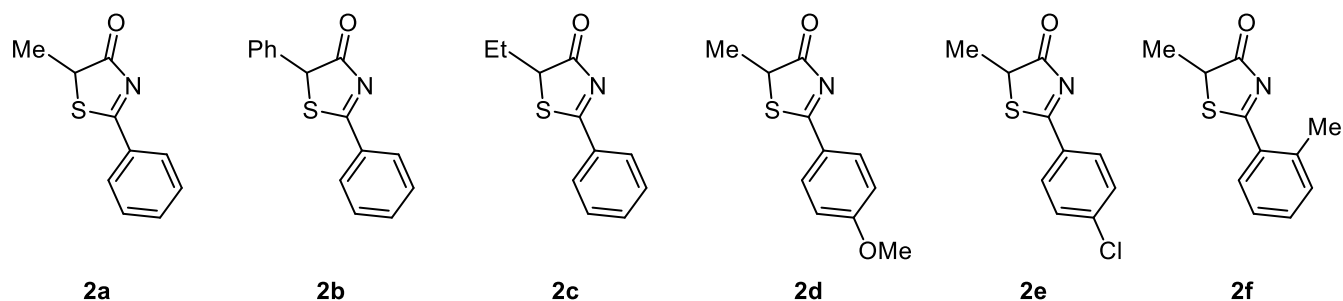

Figure S2. The summary of thiazolidinones **2**.

#### 5-methyl-2-(*o*-tolyl)thiazol-4(5H)-one:**2f**

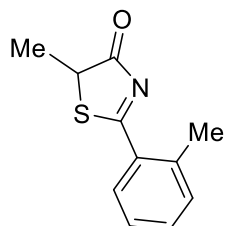

Light yellow solid.

<sup>1</sup>H NMR (600 MHz, DMSO-d<sub>6</sub>): δ 10.2 (s, 1H), 7.66 (d, *J* = 7.2 Hz, 1H), 7.32-7.27 (m, 3H), 2.53 (s, 3H), 2.23 (s, 3H). <sup>13</sup>C NMR (151 MHz, DMSO-d<sub>6</sub>): δ 158.2, 158.1, 135.2, 132.6, 131.5, 128.9, 128.4, 126.3, 102.9, 21.2, 8.9. HRMS (ESI) calcd for C<sub>11</sub>H<sub>12</sub>NOS [(M+H)<sup>+</sup>]: 206.0634, found: 206.0632.

#### 4. General Procedure III: General Procedure for Copper-Catalyzed Remote Asymmetric Yne-allylic Substitution of Yne-Allylic Esters with thiazolidinones

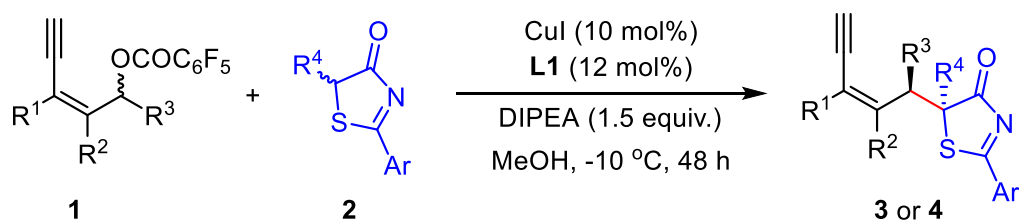

To a mixture of CuI (1.9 mg, 10 mol%), **L1** (4.4 mg, 12 mol%), Yne-Allylic Esters **1** (0.1 mmol), **2** (0.15 mmol) and DIPEA (0.15 mmol) was added MeOH (1.0 mL) at -10 °C under nitrogen atmosphere. Upon complete consumption of **1** (TLC monitoring, about 48 h), the solvent was removed under reduced pressure, and the residue was purified by chromatography on silica gel column (hexanes/EtOAc = 20:1, v/v) to afford the desired product **3** or **4**.

**(S)-5-((R)-1-(2-ethynylcyclohex-1-en-1-yl)propyl)-5-methyl-2-phenylthiazol-4(5H)-one: 3a**

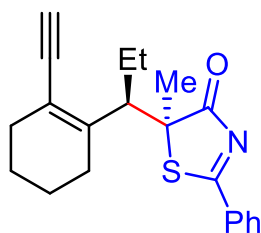

White solid. 30 mg, 89% yield, 10:1 dr, 93.6:6.4 er.

$^1\text{H}$  NMR (600 MHz,  $\text{CDCl}_3$ ):  $\delta$  8.17 (d,  $J = 7.8$  Hz, 2H), 7.67-7.65 (m, 1H), 7.53-7.50 (m, 2H), 3.87 (dd,  $J = 11.4$  and 3.0 Hz, 1H), 3.20 (s, 1H), 2.35-2.26 (m, 2H), 2.09-2.06 (m, 1H), 1.92-1.89 (m, 1H), 1.73-1.67 (m, 2H), 1.61-1.59 (m, 2H), 1.57 (s, 3H), 1.53-1.49 (m, 1H), 1.16-1.11 (m, 1H), 0.77 (t,  $J = 7.2$  Hz, 3H).  $^{13}\text{C}$  NMR (151 MHz,  $\text{CDCl}_3$ ):  $\delta$  196.6, 195.2, 142.1, 134.9, 132.3, 129.0, 128.8, 121.0, 83.8, 81.2, 67.5, 53.5, 30.5, 25.8, 24.7, 22.4, 22.3, 21.8, 11.3. HRMS (ESI) calcd for  $\text{C}_{21}\text{H}_{24}\text{NOS}$  [(M+H $^+$ )]: 338.1573, found: 338.1567. HPLC analysis of the product: Daicel Chiralpak ADH column; hexane/2-propanol = 95/5, 0.5 mL/min. Retention times: 25.06 min (major), 31.22 min (minor).

<Chromatogram>

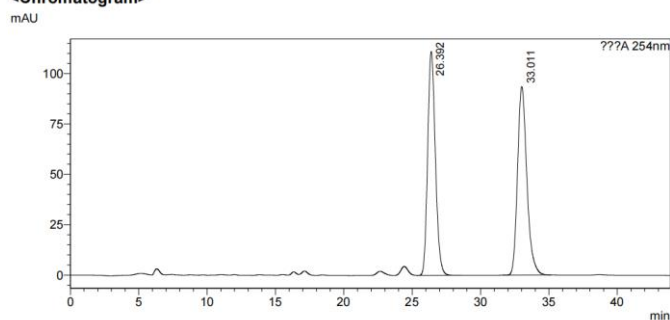

<Peak Table>

| Peak# | Ret. Time | Area    | Height | Conc.  | Unit | Mark | Name |
|-------|-----------|---------|--------|--------|------|------|------|
| 1     | 26.392    | 4346065 | 111144 | 49.419 |      | M    |      |
| 2     | 33.011    | 4448260 | 93569  | 50.581 |      | M    |      |
| Total |           | 8794326 | 204714 |        |      |      |      |

<Chromatogram>

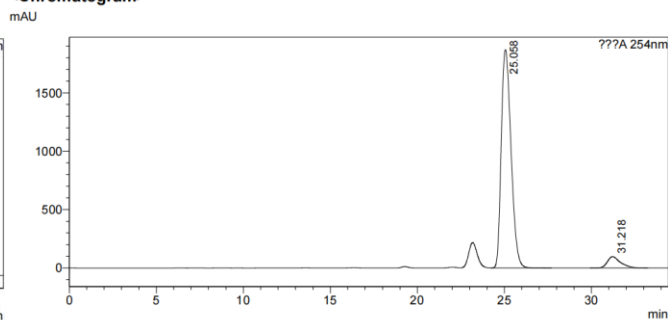

<Peak Table>

| Peak# | Ret. Time | Area     | Height  | Conc.  | Unit | Mark | Name |
|-------|-----------|----------|---------|--------|------|------|------|
| 1     | 25.058    | 72849431 | 1867934 | 93.560 |      | M    |      |
| 2     | 31.218    | 5014504  | 96889   | 6.440  |      | M    |      |
| Total |           | 77863935 | 1964822 |        |      |      |      |

**(S)-5-((R)-1-(2-ethynylcyclohex-1-en-1-yl)ethyl)-5-methyl-2-phenylthiazol-4(5H)-one: 3b**

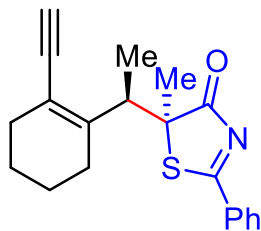

Yellow solid. 25 mg, 77% yield, 7:1 dr, 97:3 er.

$^1\text{H}$  NMR (600 MHz,  $\text{CDCl}_3$ ):  $\delta$  8.17 (d,  $J = 7.2$  Hz, 2.00H, major), 8.12 (d,  $J = 7.2$  Hz, 0.28H, minor), 7.68-7.64 (m, 1.14H), 7.53-7.50 (m, 2.28H), 4.04 (q,  $J = 13.8$  and 7.2 Hz, 1.00H, major), 3.81 (q,  $J = 14.4$  and 7.2 Hz, 0.14H, minor), 3.22 (s, 1.00H, major), 3.13 (s, 0.14H, minor), 2.32-2.22 (m, 2.60H), 2.19-2.12 (m, 1.40H), 1.96-1.92 (m, 1.12H), 1.76 (s, 0.42H, minor), 1.75-1.62 (m, 3.00H), 1.60 (s, 3.00H, major), 1.57-1.49 (m, 1.00H), 1.20 (d,  $J = 7.2$  Hz, 0.42H, minor), 0.94 (d,  $J = 7.2$  Hz, 3.00H, major).  $^{13}\text{C}$  NMR (151 MHz,  $\text{CDCl}_3$ ):  $\delta$  196.4, 195.2, 194.5, 193.9, 146.7, 144.5, 134.9, 134.8, 132.3, 132.2, 129.0, 128.9, 128.8, 128.7, 118.7, 118.0, 84.1, 83.5, 81.3, 81.1, 68.3, 67.9, 46.5, 45.6, 30.44, 30.40, 25.7, 25.2, 25.0, 24.8, 22.4, 22.3, 22.2, 22.1, 14.53, 14.48. HRMS (ESI) calcd for  $\text{C}_{20}\text{H}_{22}\text{NOS}$  [ $\text{M}+\text{H}^+$ ]: 324.1417, found: 324.1412. HPLC analysis of the product: Daicel Chiralpak ADH column; hexane/2-propanol = 95/5, 0.5 mL/min. Retention times: 23.67 min (minor), 31.76 min (major).

<Chromatogram>  
mAU

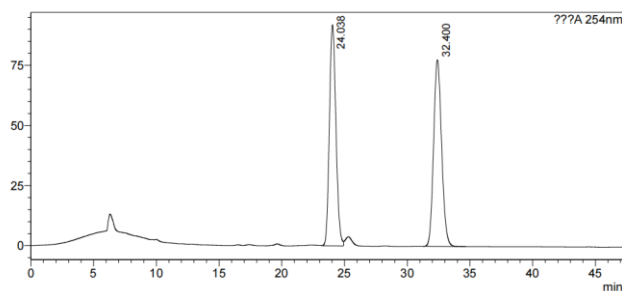

<Peak Table>

| Peak# | Ret. Time | Area    | Height | Conc.  | Unit | Mark | Name |
|-------|-----------|---------|--------|--------|------|------|------|
| 1     | 24.038    | 3328376 | 91929  | 49.100 |      |      |      |
| 2     | 32.400    | 3450402 | 77531  | 50.900 |      |      |      |
| Total |           | 6778778 | 169460 |        |      |      |      |

<Chromatogram>  
mAU

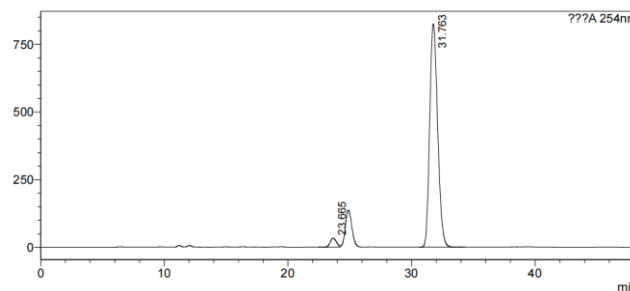

<Peak Table>

| Peak# | Ret. Time | Area     | Height | Conc.  | Unit | Mark | Name |
|-------|-----------|----------|--------|--------|------|------|------|
| 1     | 23.665    | 1200873  | 33803  | 3.153  |      |      |      |
| 2     | 31.763    | 36883568 | 825431 | 96.847 |      |      |      |
| Total |           | 38084441 | 859234 |        |      |      |      |



**(S)-5-((R)-1-(2-ethynylcyclohex-1-en-1-yl)but-3-en-1-yl)-5-methyl-2-phenylthiazol-4(5H)-one: 3c**

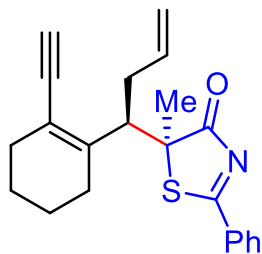

Yellow liquid. 24 mg, 69% yield, 14:1 dr, 94:6 er.

$^1\text{H}$  NMR (600 MHz,  $\text{CDCl}_3$ ):  $\delta$  8.17 (d,  $J = 7.2$  Hz, 2H), 7.68-7.66 (m, 1H), 7.54-7.51 (m, 2H), 5.65-5.58 (m, 1H), 4.91 (dd,  $J = 16.8$  and 13.2 Hz, 2H), 4.07 (dd,  $J = 11.4$  and 4.8 Hz, 1H), 3.22 (s, 1H), 2.28-2.22 (m, 3H), 2.11-2.08 (m, 1H), 1.95-1.90 (m, 2H), 1.73-1.62 (m, 3H), 1.59 (s, 3H), 1.57-1.54 (m, 1H).  $^{13}\text{C}$  NMR (151 MHz,  $\text{CDCl}_3$ ):  $\delta$  196.3, 195.0, 142.0, 135.02, 134.94, 132.2, 129.0, 128.8, 120.8, 116.3, 83.6, 81.4, 67.0, 51.3, 33.4, 30.4, 25.8, 25.0, 22.24, 22.20. HRMS (ESI) calcd for  $\text{C}_{22}\text{H}_{24}\text{NOS}$  [ $\text{M}+\text{H}^+$ ]: 350.1573, found: 350.1569. HPLC analysis of the product: Daicel Chiralpak IC-3 column; hexane/2-propanol = 95/5, 0.8 mL/min. Retention times: 30.33 min (major), 39.63 min (minor).

<Chromatogram>

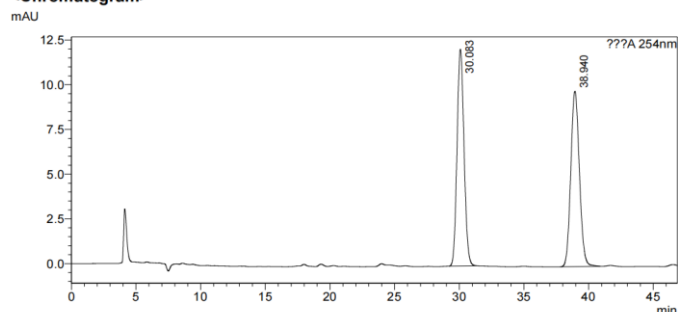

<Peak Table>

| Peak# | Ret. Time | Area   | Height | Conc.  | Unit | Mark | Name |
|-------|-----------|--------|--------|--------|------|------|------|
| 1     | 30.083    | 454857 | 12117  | 50.041 |      |      |      |
| 2     | 38.940    | 454121 | 9809   | 49.959 |      |      |      |
| Total |           | 908978 | 21926  |        |      |      |      |

<Chromatogram>

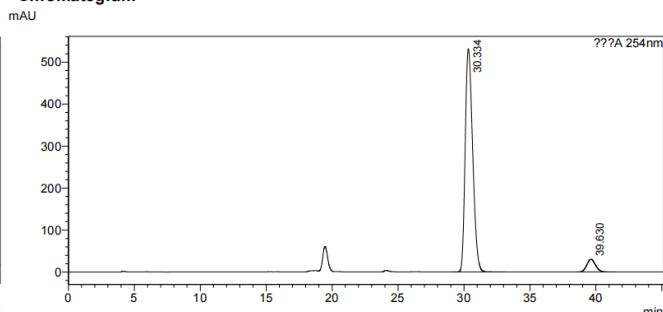

<Peak Table>

| Peak# | Ret. Time | Area     | Height | Conc.  | Unit | Mark | Name |
|-------|-----------|----------|--------|--------|------|------|------|
| 1     | 30.334    | 20835771 | 531096 | 93.710 |      | M    |      |
| 2     | 39.630    | 1398509  | 30380  | 6.290  |      |      |      |
| Total |           | 22234280 | 561476 |        |      |      |      |

**(S)-5-((R)-1-(2-ethynylcyclohex-1-en-1-yl)-2-phenylethyl)-5-methyl-2-phenylthiazol-4(5H)-one: 3d**

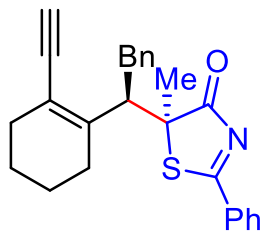

Yellow liquid. 27 mg, 68% yield, 18:1 dr, 92:8 er.

$^1\text{H}$  NMR (600 MHz,  $\text{CDCl}_3$ ):  $\delta$  8.22-8.20 (m, 2H), 7.70-7.68 (m, 1H), 7.56-7.53 (m, 2H), 7.20-7.17 (m, 2H), 7.15-7.14 (m, 1H), 7.11-7.10 (m, 2H), 4.35 (dd,  $J = 11.4$  and  $4.2$  Hz, 1H), 3.09 (s, 1H), 2.73-2.69 (m, 1H), 2.53-2.50 (m, 1H), 2.22-2.13 (m, 2H), 2.01-1.93 (m, 2H), 1.71-1.66 (m, 1H), 1.63 (s, 3H), 1.53-1.49 (m, 2H), 1.45-1.39 (m, 1H).  $^{13}\text{C}$  NMR (151 MHz,  $\text{CDCl}_3$ ):  $\delta$  196.4, 195.1, 140.9, 138.2, 135.0, 132.3, 129.1, 129.0, 128.9, 127.9, 126.1, 121.5, 83.5, 80.9, 67.3, 53.0, 35.2, 30.2, 26.0, 25.1, 22.2, 22.1. HRMS (ESI) calcd for  $\text{C}_{26}\text{H}_{26}\text{NOS}$  [(M+H $^+$ )]: 400.1730, found: 400.1727. HPLC analysis of the product: Daicel Chiralpak ODH column; hexane/2-propanol = 95/5, 0.5 mL/min. Retention times: 15.95 min (minor), 19.97 min (major).

<Chromatogram>  
mAU

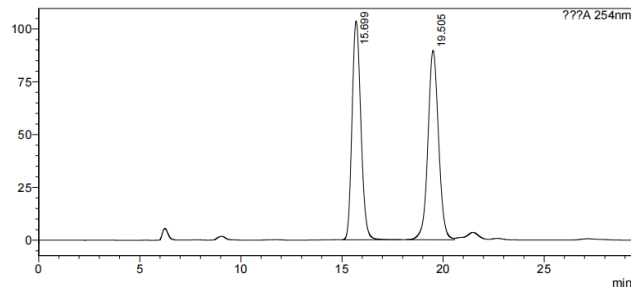

<Peak Table>

| Peak# | Ret. Time | Area    | Height | Conc.  | Unit | Mark | Name |
|-------|-----------|---------|--------|--------|------|------|------|
| 1     | 15.699    | 3144631 | 103618 | 49.023 |      |      |      |
| 2     | 19.505    | 3269924 | 89641  | 50.977 |      |      |      |
| Total |           | 6414556 | 193259 |        |      |      |      |

<Chromatogram>  
mAU

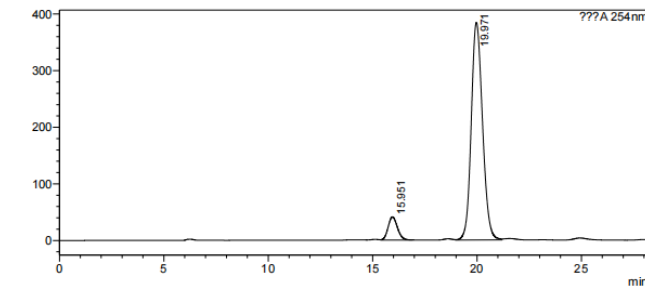

<Peak Table>

| Peak# | Ret. Time | Area     | Height | Conc.  | Unit | Mark | Name |
|-------|-----------|----------|--------|--------|------|------|------|
| 1     | 15.951    | 1270022  | 40848  | 8.096  |      | M    |      |
| 2     | 19.971    | 14417125 | 384305 | 91.904 |      | M    |      |
| Total |           | 15687146 | 425153 |        |      |      |      |

**(S)-5-((R)-1-(2-ethynylcyclohex-1-en-1-yl)-3-phenylpropyl)-5-methyl-2-phenylthiazol-4(5H)-one:**  
**3e**

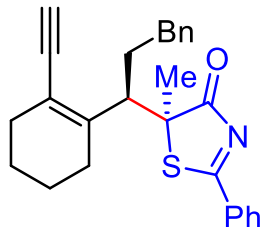

White solid. 21 mg, 51% yield, 8:1 dr, 90.3:9.7 er.

$^1\text{H}$  NMR (600 MHz,  $\text{CDCl}_3$ ):  $\delta$  8.14 (d,  $J = 7.8$  Hz, 2.00H, major), 8.10 (d,  $J = 7.8$  Hz, 0.24H, minor), 7.66-7.64 (m, 1.12H), 7.52-7.49 (m, 2.24H), 7.25-7.24 (m, 0.24H), 7.22-7.19 (m, 2.00H), 7.17-7.14 (m, 0.36H), 7.13-7.08 (m, 3.00H), 4.08 (dd,  $J = 12.0$  and 3.6 Hz, 1.00H, major), 3.74 (dd,  $J = 9.6$  and 5.4 Hz, 0.12H, minor), 3.24 (s, 1.00H, major), 3.14 (s, 0.12H, minor), 2.60-2.54 (m, 1.12H), 2.45-2.40 (m, 1.12H), 2.36-2.28 (m, 2.24H), 2.17-2.11 (m, 1.12H), 1.99-1.94 (m, 1.12H), 1.85-1.77 (m, 1.60H), 1.75 (s, 0.36H, minor), 1.74-1.61 (m, 3.00H), 1.60 (s, 3.00H, major), 1.58-1.52 (m, 1.00H), 1.42-1.37 (m, 1.12H).  $^{13}\text{C}$  NMR (151 MHz,  $\text{CDCl}_3$ ):  $\delta$  196.4, 195.2, 194.3, 193.1, 144.1, 141.9, 141.8, 141.5, 134.9, 134.8, 133.3, 132.2, 129.1, 128.9, 128.8, 128.7, 128.4, 128.31, 128.27, 128.2, 125.9, 125.8, 121.4, 121.0, 84.3, 83.6, 81.6, 81.3, 67.8, 67.3, 52.0, 50.8, 33.8, 33.5, 30.9, 30.6, 30.5, 30.0, 25.8, 25.3, 25.2, 24.9, 22.4, 22.34, 22.27, 22.2. HRMS (ESI) calcd for  $\text{C}_{27}\text{H}_{28}\text{NOS}$  [(M+H $^+$ )]: 414.1886, found: 414.1885. HPLC analysis of the product: Daicel Chiralpak IA-3 column; hexane/2-propanol = 95/5, 0.5 mL/min. Retention times: 24.82 min (minor), 34.96 min (major).

<Chromatogram>  
mAU

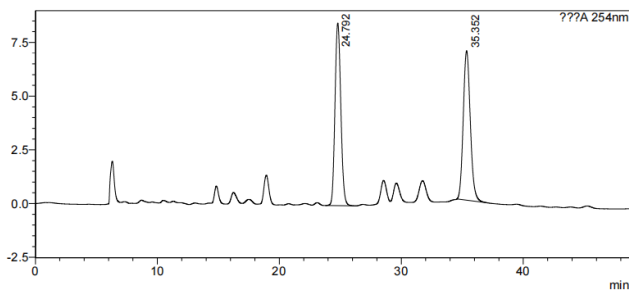

<Peak Table>

| Peak# | Ret. Time | Area   | Height | Conc.  | Unit | Mark | Name |
|-------|-----------|--------|--------|--------|------|------|------|
| 1     | 24.792    | 281842 | 8494   | 50.221 |      | M    |      |
| 2     | 35.352    | 279361 | 6950   | 49.779 |      | M    |      |
| Total |           | 561202 | 15444  |        |      |      |      |

<Chromatogram>  
mAU

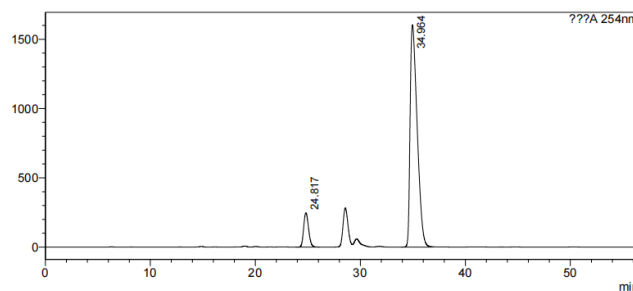

<Peak Table>

| Peak# | Ret. Time | Area     | Height  | Conc.  | Unit | Mark | Name |
|-------|-----------|----------|---------|--------|------|------|------|
| 1     | 24.817    | 8043550  | 246685  | 9.692  |      | M    |      |
| 2     | 34.964    | 74951943 | 1604615 | 90.308 |      | M    |      |
| Total |           | 82995492 | 1851301 |        |      |      |      |

(S)-5-((R)-(2-ethynylcyclohex-1-en-1-yl)(phenyl)methyl)-5-methyl-2-phenylthiazol-4(5H)-one: 3f

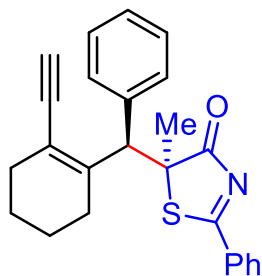

White solid. 35 mg, 91% yield, 4:1 dr, 98:2 er, 86:14 er.

$^1\text{H}$  NMR (600 MHz,  $\text{CDCl}_3$ ):  $\delta$  8.12 (d,  $J = 7.8$  Hz, 0.50H, minor), 8.08 (d,  $J = 7.8$  Hz, 2.00H, major), 7.65-7.62 (m, 1.25H), 7.52-7.44 (m, 3.00H), 7.33-7.31 (m, 0.50H), 7.27-7.25 (m, 2.25H), 7.15-7.10 (m, 3.00H), 5.31 (s, 1.00H, major), 5.18 (s, 0.25H, minor), 3.28 (s, 0.25H, minor), 3.26 (s, 1.00H, major), 2.36-2.22 (m, 5.20H), 2.16-2.08 (m, 1.00H), 1.73 (s, 3.00H, major), 1.71 (s, 0.75H, minor), 1.67-1.62 (m, 2.50H), 1.51-1.40 (m, 1.30H).  $^{13}\text{C}$  NMR (151 MHz,  $\text{CDCl}_3$ ):  $\delta$  196.3, 195.4, 194.6, 194.3, 144.3, 142.8, 139.1, 138.3, 134.8, 132.2, 129.05, 129.01, 129.00, 128.9, 128.74, 128.71, 128.5, 128.4, 128.2, 128.0, 127.3, 127.1, 120.7, 119.1, 84.2, 83.6, 81.7, 81.5, 67.4, 66.4, 57.7, 56.8, 30.7, 30.5, 28.1, 27.4, 26.8, 26.1, 22.5, 22.4, 22.1, 21.8. HRMS (ESI) calcd for  $\text{C}_{25}\text{H}_{24}\text{NOS}$  [(M+H $^+$ ): 386.1573, found: 386.1562. HPLC analysis of the product: Daicel Chiralpak ODH column; hexane/2-propanol = 95/5, 0.3 mL/min. Retention times: for major product: 25.58 min (major), 30.22 min (minor); for minor product: 23.40 min (minor), 27.71 min (major).

<Chromatogram>

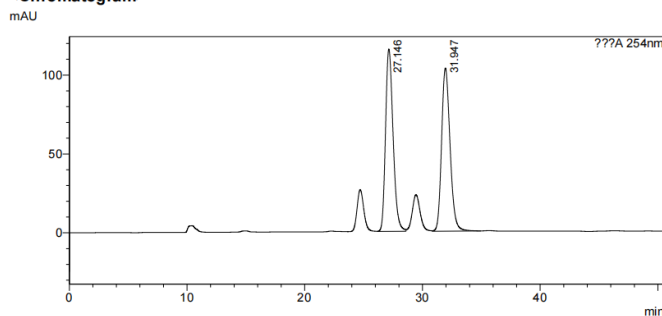

<Peak Table>

| Peak# | Ret. Time | Area     | Height | Conc.  | Unit | Mark | Name |
|-------|-----------|----------|--------|--------|------|------|------|
| 1     | 27.146    | 5153811  | 115618 | 49.939 |      |      |      |
| 2     | 31.947    | 5166425  | 103353 | 50.061 |      |      |      |
| Total |           | 10320236 | 218971 |        |      |      |      |

<Chromatogram>

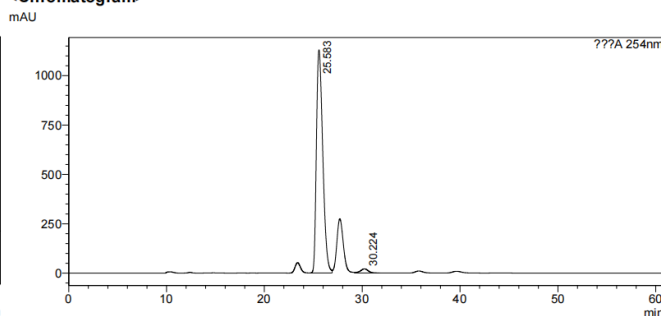

<Peak Table>

| Peak# | Ret. Time | Area     | Height  | Conc.  | Unit | Mark | Name |
|-------|-----------|----------|---------|--------|------|------|------|
| 1     | 25.583    | 50921267 | 1129197 | 97.758 |      | M    |      |
| 2     | 30.224    | 1167852  | 20751   | 2.242  |      | M    |      |
| Total |           | 52089120 | 1149948 |        |      |      |      |

<Chromatogram>

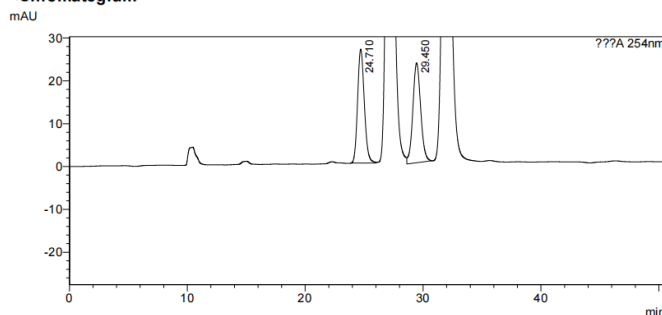

<Peak Table>

| Peak# | Ret. Time | Area    | Height | Conc.  | Unit | Mark | Name |
|-------|-----------|---------|--------|--------|------|------|------|
| 1     | 24.710    | 1054734 | 26589  | 49.461 |      | M    |      |
| 2     | 29.450    | 1077710 | 23294  | 50.539 |      | M    |      |
| Total |           | 2132444 | 49883  |        |      |      |      |

<Chromatogram>

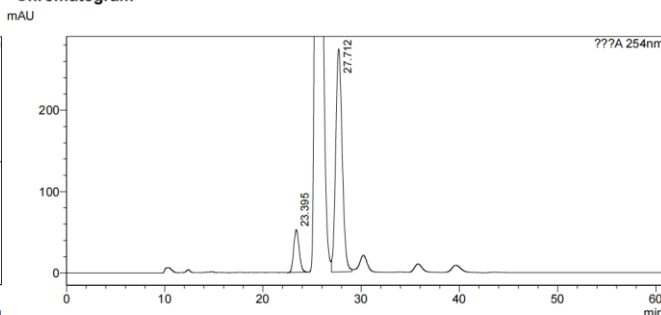

<Peak Table>

| Peak# | Ret. Time | Area     | Height | Conc.  | Unit | Mark | Name |
|-------|-----------|----------|--------|--------|------|------|------|
| 1     | 23.395    | 2030798  | 52325  | 13.854 |      | M    |      |
| 2     | 27.712    | 12627404 | 273955 | 86.146 |      | M    |      |
| Total |           | 14658202 | 326281 |        |      |      |      |

**(S)-5-((S)-(2-ethynylcyclohex-1-en-1-yl)(o-tolyl)methyl)-5-methyl-2-phenylthiazol-4(5H)-one: 3g**

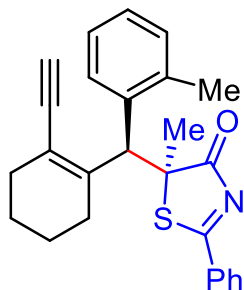

Yellow solid. 31 mg, 78% yield, 4:1 dr, 76.5:23.5 er.

$^1\text{H}$  NMR (600 MHz,  $\text{CDCl}_3$ ):  $\delta$  8.12 (d,  $J = 7.8$  Hz, 2.00H, major), 8.10 (d,  $J = 7.8$  Hz, 0.50H, minor), 7.67-7.65 (m, 1.25H), 7.56-7.54 (m, 1.00H), 7.52-7.50 (m, 2.50H), 7.46-7.45 (m, 0.25H), 7.19-7.17 (m, 0.25H), 7.15-7.13 (m, 0.50H), 7.10-7.09 (m, 1.00H), 7.03-7.00 (m, 1.00H), 6.91-6.89 (m, 1.00H), 5.45 (s, 1.00H, major), 5.39 (s, 0.25H, minor), 3.31 (s, 1.00H, major), 3.29 (s, 0.25H, minor), 2.64-2.61 (m, 0.25H), 2.50 (s, 3.00H, major), 2.47 (s, 0.75H, minor), 2.44-2.33 (m, 2.25H), 2.29-2.24 (m, 1.50H), 2.17-2.13 (m, 0.25H), 2.04-2.00 (m, 1.00H), 1.87 (s, 3.00H, major), 1.75 (s, 0.75H, minor), 1.68-1.60 (m, 3.75H), 1.55-1.50 (m, 1.00H).  $^{13}\text{C}$  NMR (151 MHz,  $\text{CDCl}_3$ ):  $\delta$  195.1, 194.9, 193.7, 193.6, 143.1, 142.2, 138.13, 138.08, 136.8, 136.5, 134.8, 134.7, 132.31, 132.25, 131.04, 131.02, 129.0, 128.8, 128.7, 128.6, 127.8, 127.0, 126.9, 126.7, 125.5, 125.2, 120.7, 119.8, 84.7, 84.6, 81.7, 81.6, 68.6, 68.2, 53.3, 51.5, 31.1, 30.9, 28.5, 27.5, 26.8, 26.7, 22.5, 22.4, 21.99, 21.90, 21.0. HRMS (ESI) calcd for  $\text{C}_{26}\text{H}_{26}\text{NOS}$  [(M+H $^+$ )]: 400.1730, found: 400.1726. HPLC analysis of the product: Daicel Chiralpak ODH column; hexane/2-propanol = 90/10, 0.5 mL/min. Retention times: 11.73 min (major), 13.39 min (minor).

<Chromatogram>  
mAU

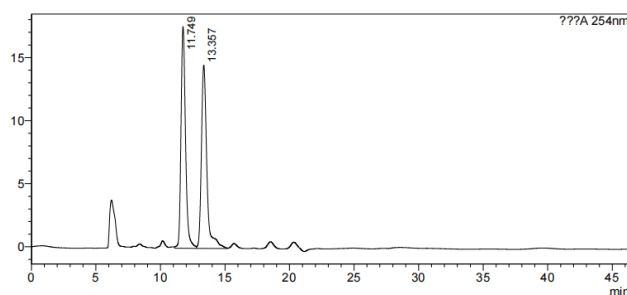

<Peak Table>

| Peak# | Ret. Time | Area   | Height | Conc.  | Unit | Mark | Name |
|-------|-----------|--------|--------|--------|------|------|------|
| 1     | 11.749    | 427970 | 17566  | 50.165 |      |      |      |
| 2     | 13.357    | 425156 | 14528  | 49.835 |      | V M  |      |
| Total |           | 853127 | 32095  |        |      |      |      |

<Chromatogram>  
mAU

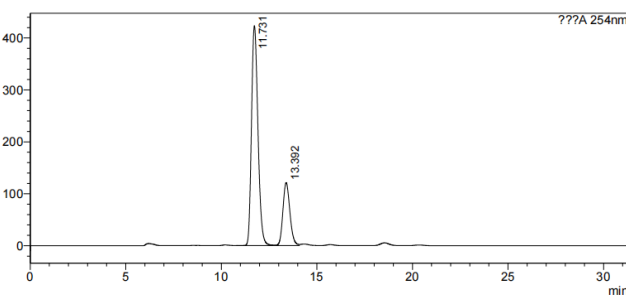

<Peak Table>

| Peak# | Ret. Time | Area     | Height | Conc.  | Unit | Mark | Name |
|-------|-----------|----------|--------|--------|------|------|------|
| 1     | 11.731    | 9960802  | 423194 | 76.305 |      |      |      |
| 2     | 13.392    | 3093179  | 121319 | 23.695 |      | V    |      |
| Total |           | 13053982 | 544513 |        |      |      |      |

**(S)-5-((S)-(2-ethynylcyclohex-1-en-1-yl)(2-methoxyphenyl)methyl)-5-methyl-2-phenylthiazol-4(5H)-one: 3h**

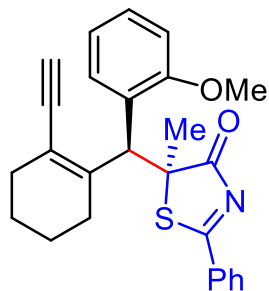

White solid. 26 mg, 63% yield, 11:1 dr, 96.7:3.3 er, 95:5 er.

$^1\text{H}$  NMR (600 MHz,  $\text{CDCl}_3$ ):  $\delta$  8.11 (d,  $J = 7.8$  Hz, 2H), 7.67-7.64 (m, 1H), 7.52-7.49 (m, 3H), 7.11-7.08 (m, 1H), 6.81-6.80 (m, 1H), 6.69-6.66 (m, 1H), 5.83 (s, 1H), 3.82 (s, 3H), 3.26 (s, 1H), 2.35-2.27 (m, 3H), 2.10-2.07 (m, 1H), 1.83 (s, 3H), 1.71-1.61 (m, 2H), 1.57-1.52 (m, 2H).  $^{13}\text{C}$  NMR (151 MHz,  $\text{CDCl}_3$ ):  $\delta$  194.9, 193.4, 157.7, 142.4, 134.7, 132.4, 128.9, 128.7, 128.0, 127.7, 127.3, 120.5, 119.9, 111.4, 84.5, 80.8, 67.8, 55.9, 48.1, 30.9, 28.2, 26.8, 22.6, 22.1. HRMS (ESI) calcd for  $\text{C}_{26}\text{H}_{26}\text{NO}_2\text{S}$  [ $\text{M}+\text{H}^+$ ]: 416.1679, found: 416.1675. HPLC analysis of the product: Daicel Chiralpak ASH column; hexane/2-propanol = 94/6, 0.3 mL/min. Retention times: for major product: 31.52 min (minor), 43.48 min (major); for minor product: 29.46 min (major), 37.09 min (minor).

<Chromatogram>  
mAU

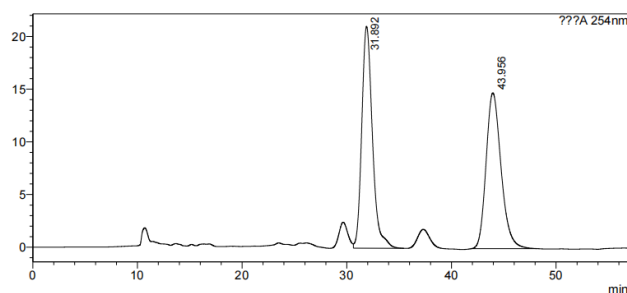

<Peak Table>

| Peak# | Ret. Time | Area    | Height | Conc.  | Unit | Mark | Name |
|-------|-----------|---------|--------|--------|------|------|------|
| 1     | 31.892    | 1495618 | 21060  | 50.369 |      |      |      |
| 2     | 43.956    | 1473694 | 14795  | 49.631 |      |      |      |
| Total |           | 2969313 | 35856  |        |      |      |      |

<Chromatogram>  
mAU

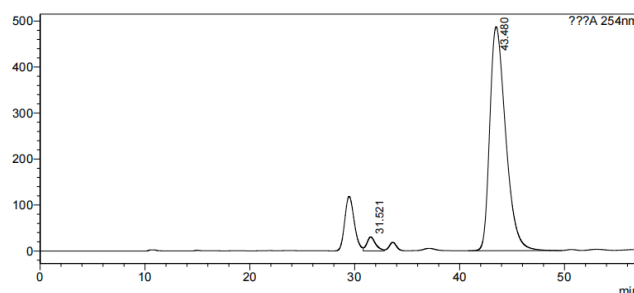

<Peak Table>

| Peak# | Ret. Time | Area     | Height | Conc.  | Unit | Mark | Name |
|-------|-----------|----------|--------|--------|------|------|------|
| 1     | 31.521    | 1763352  | 30260  | 3.324  |      |      |      |
| 2     | 43.480    | 51287191 | 487199 | 96.676 |      | M    |      |
| Total |           | 53050543 | 517459 |        |      |      |      |

<Chromatogram>  
mAU

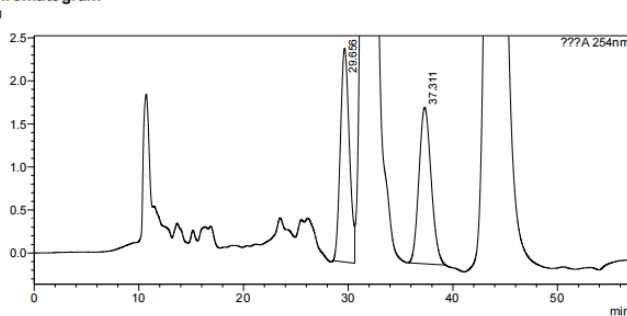

<Peak Table>

| Peak# | Ret. Time | Area   | Height | Conc.  | Unit | Mark | Name |
|-------|-----------|--------|--------|--------|------|------|------|
| 1     | 29.656    | 148214 | 2483   | 50.155 |      | M    |      |
| 2     | 37.311    | 147297 | 1819   | 49.845 |      | M    |      |
| Total |           | 295512 | 4302   |        |      |      |      |

<Chromatogram>  
mAU

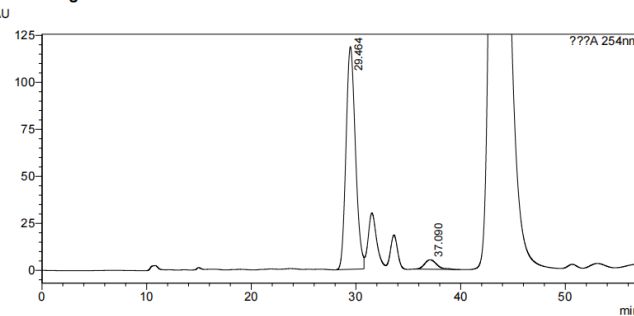

<Peak Table>

| Peak# | Ret. Time | Area    | Height | Conc.  | Unit | Mark | Name |
|-------|-----------|---------|--------|--------|------|------|------|
| 1     | 29.464    | 7404521 | 118396 | 94.752 |      | M    |      |
| 2     | 37.090    | 410087  | 5034   | 5.248  |      | M    |      |
| Total |           | 7814608 | 123430 |        |      |      |      |

**(S)-5-((R)-(2-ethynylcyclohex-1-en-1-yl)(m-tolyl)methyl)-5-methyl-2-phenylthiazol-4(5H)-one: 3i**

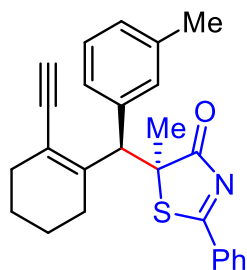

Light yellow liquid. 37 mg, 93% yield, 2:1 dr, 97.4:2.6 er, 82.6:17.4 er.

$^1\text{H}$  NMR (600 MHz,  $\text{CDCl}_3$ ):  $\delta$  8.14 (d,  $J = 7.8$  Hz, 1.00H, minor), 8.09 (d,  $J = 7.8$  Hz, 2.00H, major), 7.67-7.63 (m, 1.50H), 7.53-7.48 (m, 3.00H), 7.27-7.26 (m, 0.50H), 7.23-7.20 (m, 1.00H), 7.11-7.08 (m, 2.50H), 7.03-7.00 (m, 1.00H), 6.93-6.92 (m, 1.00H), 5.27 (s, 1.00H, major), 5.16 (s, 0.50H, minor), 3.29 (s, 0.50H, minor), 3.28 (s, 1.00H, major), 2.36 (s, 1.50H, minor), 2.35-2.22 (m, 5.25H), 2.19 (s, 3.00H, major), 2.16-2.10 (m, 1.00H), 1.74 (s, 3.00H, major), 1.71 (s, 1.50H, minor), 1.69-1.58 (m, 4.25H), 1.50-1.39 (m, 1.50H).  $^{13}\text{C}$  NMR (151 MHz,  $\text{CDCl}_3$ ):  $\delta$  195.4, 194.6, 194.3, 193.8, 144.4, 142.9, 138.9, 138.15, 138.09, 137.7, 134.81, 134.78, 132.31, 132.26, 130.0, 129.5, 129.0, 128.9, 128.70, 128.67, 128.3, 128.1, 128.0, 127.9, 125.9, 125.1, 120.5, 119.0, 84.2, 83.6, 81.6, 81.4, 67.5, 66.5, 57.7, 56.8, 30.7, 30.5, 28.1, 27.3, 26.8, 26.1, 22.5, 22.4, 22.1, 21.8, 21.6, 21.5. HRMS (ESI) calcd for  $\text{C}_{26}\text{H}_{26}\text{NOS}$  [ $\text{M}+\text{H}^+$ ]: 400.1730, found: 400.1726. HPLC analysis of the product: Daicel Chiralpak IA-3 column; hexane/2-propanol = 95/5, 0.5 mL/min. Retention times: for major product: 28.79 min (major), 35.07 min (minor); for minor product: 24.52 min (minor), 43.12 min (major).

<Chromatogram>

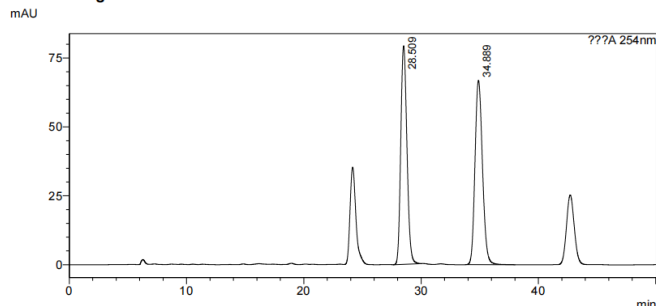

<Peak Table>

| Peak# | Ret. Time | Area    | Height | Conc.  | Unit | Mark | Name |
|-------|-----------|---------|--------|--------|------|------|------|
| 1     | 28.509    | 2394067 | 79253  | 49.333 |      |      |      |
| 2     | 34.889    | 2972377 | 69907  | 50.667 |      |      |      |
| Total |           | 5366443 | 146160 |        |      |      |      |

<Chromatogram>

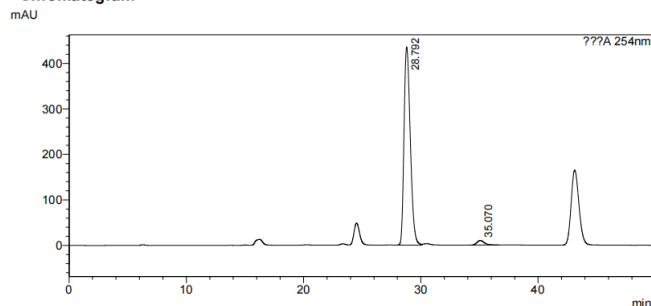

<Peak Table>

| Peak# | Ret. Time | Area     | Height | Conc.  | Unit | Mark | Name |
|-------|-----------|----------|--------|--------|------|------|------|
| 1     | 28.792    | 16206334 | 435458 | 97.355 |      | M    |      |
| 2     | 35.070    | 440373   | 9988   | 2.645  |      |      |      |
| Total |           | 16646707 | 445446 |        |      |      |      |

<Chromatogram>

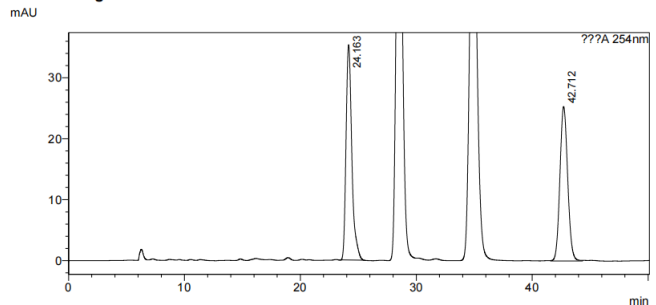

<Peak Table>

| Peak# | Ret. Time | Area    | Height | Conc.  | Unit | Mark | Name |
|-------|-----------|---------|--------|--------|------|------|------|
| 1     | 24.163    | 1224082 | 35305  | 50.970 |      | M    |      |
| 2     | 42.712    | 1177503 | 28337  | 49.030 |      | M    |      |
| Total |           | 2401585 | 60642  |        |      |      |      |

<Chromatogram>

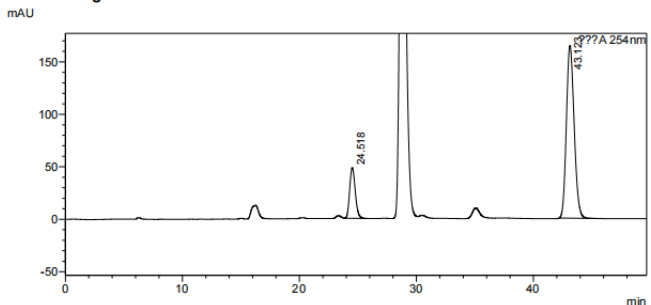

<Peak Table>

| Peak# | Ret. Time | Area    | Height | Conc.  | Unit | Mark | Name |
|-------|-----------|---------|--------|--------|------|------|------|
| 1     | 24.518    | 1597281 | 48242  | 17.390 |      | M    |      |
| 2     | 43.123    | 7587543 | 164553 | 82.610 |      | M    |      |
| Total |           | 9184824 | 212795 |        |      |      |      |

**(S)-5-((R)-(2-ethynylcyclohex-1-en-1-yl)(3-methoxyphenyl)methyl)-5-methyl-2-phenylthiazol-4(5H)-one: 3j**

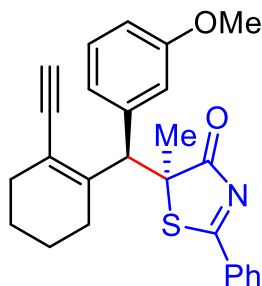

Colorless liquid. 37 mg, 89% yield, 3:1 dr, 97.5:2.5 er, 87:13 er.

<sup>1</sup>H NMR (600 MHz, CDCl<sub>3</sub>): δ 8.10 (d, *J* = 7.8 Hz, 2H), 7.66-7.64 (m, 1H), 7.51-7.48 (m, 2H), 7.07-7.04 (m, 1H), 6.87-6.84 (m, 2H), 6.68-6.66 (m, 1H), 5.29 (s, 1H), 3.64 (s, 3H), 3.27 (s, 1H), 2.36-2.21 (m, 4H), 1.73 (s, 3H), 1.69-1.61 (m, 4H). <sup>13</sup>C NMR (151 MHz, CDCl<sub>3</sub>): δ 195.3, 194.4, 159.2, 142.7, 139.8, 134.9, 132.2, 129.1, 129.0, 128.7, 120.71, 120.66, 114.2, 112.6, 83.6, 81.7, 66.3, 56.6, 55.0, 30.5, 27.6, 26.7, 22.5, 22.1. HRMS (ESI) calcd for C<sub>26</sub>H<sub>26</sub>NO<sub>2</sub>S [(M+H<sup>+</sup>)]: 416.1679, found: 416.1676. HPLC analysis of the product: Daicel Chiralpak ODH column; hexane/2-propanol = 95/5, 0.3 mL/min. Retention times: for major product: 35.94 min (major), 41.61 min (minor); for minor product: 30.79 min (minor), 38.60 min (major).

<Chromatogram>  
mAU

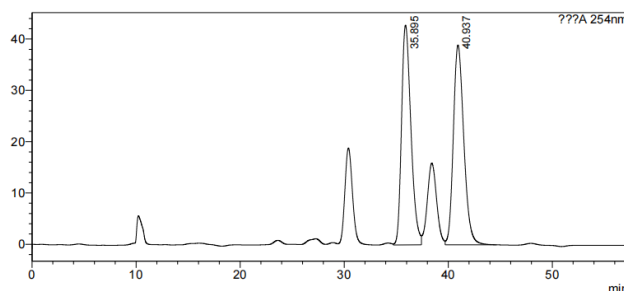

<Peak Table>

| Peak# | Ret. Time | Area    | Height | Conc.  | Unit | Mark | Name |
|-------|-----------|---------|--------|--------|------|------|------|
| 1     | 35.885    | 2688937 | 42826  | 49.631 |      |      |      |
| 2     | 40.937    | 2728946 | 38923  | 50.369 |      |      |      |
| Total |           | 5417883 | 81750  |        |      |      |      |

<Chromatogram>  
mAU

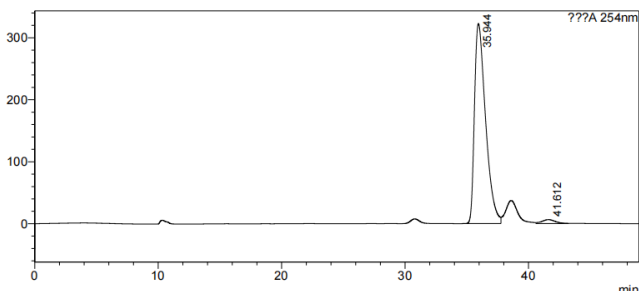

<Peak Table>

| Peak# | Ret. Time | Area     | Height | Conc.  | Unit | Mark | Name |
|-------|-----------|----------|--------|--------|------|------|------|
| 1     | 35.944    | 20225661 | 322915 | 97.557 |      |      |      |
| 2     | 41.612    | 506478   | 6471   | 2.443  |      | M    |      |
| Total |           | 20732139 | 329386 |        |      |      |      |

<Chromatogram>  
mAU

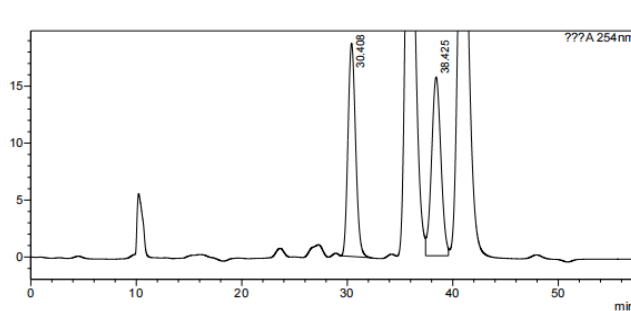

<Peak Table>

| Peak# | Ret. Time | Area    | Height | Conc.  | Unit | Mark | Name |
|-------|-----------|---------|--------|--------|------|------|------|
| 1     | 30.408    | 941465  | 18724  | 49.332 |      | M    |      |
| 2     | 38.425    | 966968  | 15703  | 50.668 |      | M    |      |
| Total |           | 1908433 | 34426  |        |      |      |      |

<Chromatogram>  
mAU

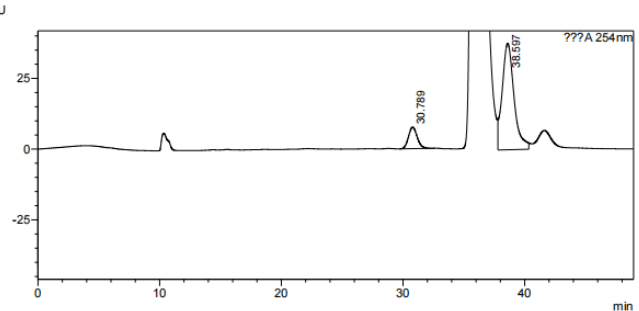

<Peak Table>

| Peak# | Ret. Time | Area    | Height | Conc.  | Unit | Mark | Name |
|-------|-----------|---------|--------|--------|------|------|------|
| 1     | 30.789    | 378597  | 7588   | 12.919 |      | M    |      |
| 2     | 38.597    | 2551901 | 37628  | 87.081 |      | M    |      |
| Total |           | 2930498 | 45215  |        |      |      |      |



**(S)-5-((R)-(2-ethynylcyclohex-1-en-1-yl)(4-fluorophenyl)methyl)-5-methyl-2-phenylthiazol-4(5H)-one: 3k**

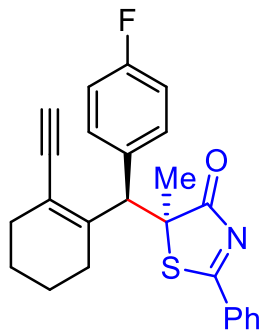

Light yellow solid. 27 mg, 67% yield, 4:1 dr, 98:2 er, 88.3:11.7 er.

$^1\text{H}$  NMR (600 MHz,  $\text{CDCl}_3$ ):  $\delta$  8.11 (d,  $J = 8.4$  Hz, 0.50H, minor), 8.08 (d,  $J = 7.8$  Hz, 2.00H, major), 7.68-7.65 (m, 1.00H), 7.53-7.49 (m, 3.00H), 7.43-7.41 (m, 0.50H), 7.29-7.27 (m, 1.75H), 7.03-7.00 (m, 0.50H), 6.85-6.82 (m, 2.00H), 5.28 (s, 1.00H, major), 5.16 (s, 0.25H, minor), 3.29 (s, 1.25H), 2.36-2.24 (m, 5.00H), 2.14-1.98 (m, 1.00H), 1.73 (s, 3.00H, major), 1.72 (s, 0.75H, minor), 1.65-1.62 (m, 3.00H), 1.52-1.45 (m, 1.00H).  $^{13}\text{C}$  NMR (151 MHz,  $\text{CDCl}_3$ ):  $\delta$  195.3, 195.0, 194.4, 193.8, 162.8, 162.7, 161.2, 161.1, 144.2, 142.5, 135.00, 134.97, 134.8 (d,  $J = 3.3$  Hz, minor), 134.1 (d,  $J = 3.2$  Hz, major), 132.2, 132.1, 130.6 (d,  $J = 8.2$  Hz, minor), 130.2 (d,  $J = 7.4$  Hz, major), 128.89 (d,  $J = 36.1$  Hz, major), 128.88 (d,  $J = 45.5$  Hz, minor), 120.8, 119.3, 115.4 (d,  $J = 22.0$  Hz, minor), 115.1 (d,  $J = 21.6$  Hz, major), 84.1, 83.4, 82.0, 81.7, 67.5, 66.5, 57.0, 56.2, 30.6, 30.5, 27.9, 27.2, 26.8, 26.0, 22.5, 22.4, 22.0, 21.8.  $^{19}\text{F}$  NMR (566 MHz,  $\text{CDCl}_3$ ):  $\delta$  -115.0 (minor), -115.4 (major). HRMS (ESI) calcd for  $\text{C}_{25}\text{H}_{23}\text{FNOS}$  [ $\text{M}+\text{H}^+$ ]: 404.1479, found: 404.1475. HPLC analysis of the product: Daicel Chiralpak ADH column; hexane/2-propanol = 95/5, 0.5 mL/min. Retention times: for major product: 37.66 min (major), 72.93 min (minor); for minor product: 29.08 min (minor), 52.94 min (major).

<Chromatogram>  
mAU

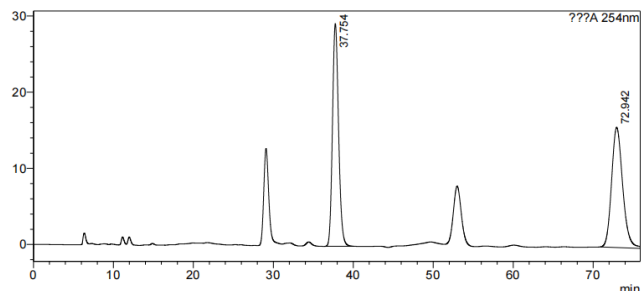

<Peak Table>

| Peak# | Ret. Time | Area    | Height | Conc.  | Unit | Mark | Name |
|-------|-----------|---------|--------|--------|------|------|------|
| 1     | 37.754    | 1546066 | 29238  | 50.459 |      |      |      |
| 2     | 72.942    | 1517926 | 15778  | 49.541 |      | M    |      |
| Total |           | 3063992 | 45015  |        |      |      |      |

<Chromatogram>  
mAU

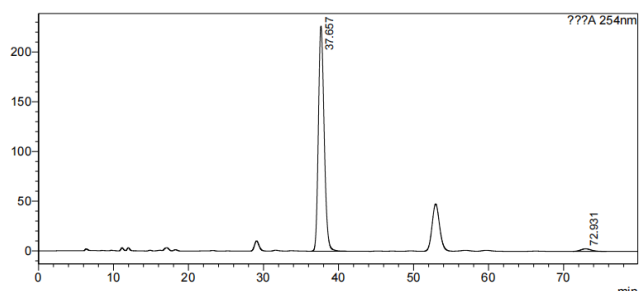

<Peak Table>

| Peak# | Ret. Time | Area     | Height | Conc.  | Unit | Mark | Name |
|-------|-----------|----------|--------|--------|------|------|------|
| 1     | 37.657    | 12108547 | 226244 | 98.071 |      |      |      |
| 2     | 72.931    | 238180   | 2552   | 1.929  |      |      |      |
| Total |           | 12346728 | 228796 |        |      |      |      |

<Chromatogram>  
mAU

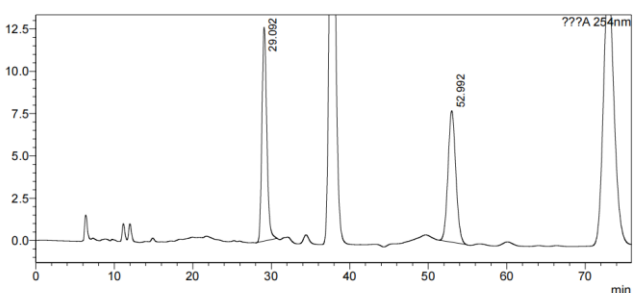

<Peak Table>

| Peak# | Ret. Time | Area    | Height | Conc.  | Unit | Mark | Name |
|-------|-----------|---------|--------|--------|------|------|------|
| 1     | 29.092    | 543199  | 12629  | 50.245 |      | M    |      |
| 2     | 52.992    | 537911  | 7764   | 49.755 |      | M    |      |
| Total |           | 1081110 | 20392  |        |      |      |      |

<Chromatogram>  
mAU

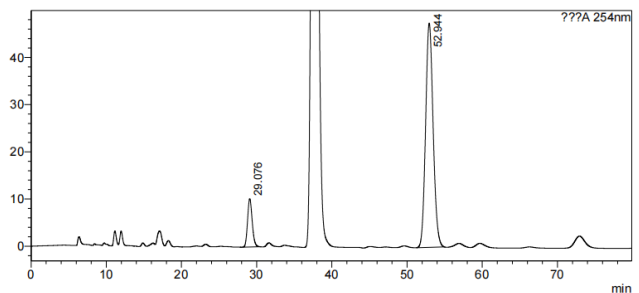

<Peak Table>

| Peak# | Ret. Time | Area    | Height | Conc.  | Unit | Mark | Name |
|-------|-----------|---------|--------|--------|------|------|------|
| 1     | 29.076    | 436184  | 10204  | 11.675 |      | M    |      |
| 2     | 52.944    | 3299738 | 47513  | 88.325 |      | M    |      |
| Total |           | 3735922 | 57717  |        |      |      |      |

**(S)-5-((R)-(4-chlorophenyl)(2-ethynylcyclohex-1-en-1-yl)methyl)-5-methyl-2-phenylthiazol-4(5H)-one: 3l**

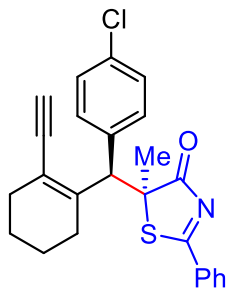

White solid. 37 mg, 79% yield, 3.3:1 dr, 98:2 er, 88:12 er.

<sup>1</sup>H NMR (600 MHz, CDCl<sub>3</sub>): δ 8.11 (d, *J* = 7.2 Hz, 0.60H, minor), 8.09 (d, *J* = 7.2 Hz, 2.00H, major), 7.67-7.64 (m, 1.00H), 7.53-7.49 (m, 2.90H), 7.38 (d, *J* = 8.4 Hz, 0.60H, minor), 7.29 (d, *J* = 8.4 Hz, 0.60H, minor), 7.23 (d, *J* = 8.4 Hz, 2.00H, major), 7.12 (d, *J* = 8.4 Hz, 2.00H, major), 5.27 (s, 1.00H, major), 5.15 (s, 0.30H, minor), 3.28 (s, 1.30H), 2.35-2.22 (m, 5.50H), 2.13-2.09 (m, 0.90H), 1.73 (s, 3.00H, major), 1.72 (s, 0.90H, minor), 1.68-1.57 (m, 4.00H).

<sup>13</sup>C NMR (151 MHz, CDCl<sub>3</sub>): δ 195.2, 194.4, 194.3, 193.6, 143.9, 142.2, 137.6, 136.8, 135.03, 134.99, 133.2, 133.0, 132.1, 132.0, 130.3, 129.9, 129.02, 129.00, 128.8, 128.7, 128.6, 128.4, 121.1, 119.5, 84.0, 83.3, 82.0, 81.8, 67.2, 66.3, 57.0, 56.2, 30.6, 30.5, 28.0, 27.3, 26.8, 26.0, 22.5, 22.4, 22.0, 21.7. HRMS (ESI) calcd for C<sub>25</sub>H<sub>23</sub>ClNOS [(M+H)<sup>+</sup>]: 420.1183, found: 420.1180. HPLC analysis of the product: Daicel Chiralpak IA-3 column; hexane/2-propanol = 92/8, 1.0 mL/min. Retention times: for major product: 14.60 min (major), 17.11 min (minor); for minor product: 11.18 min (minor), 15.70 min (major).

<Chromatogram>  
mAU

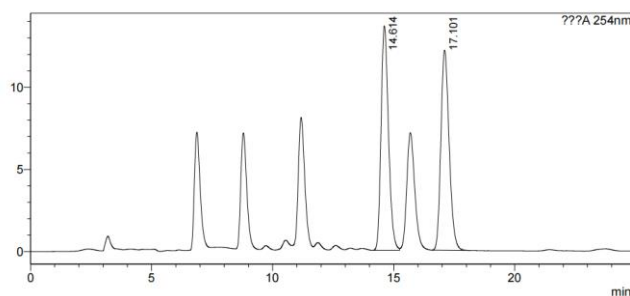

<Peak Table>

| Peak# | Ret. Time | Area   | Height | Conc.  | Unit | Mark | Name |
|-------|-----------|--------|--------|--------|------|------|------|
| 1     | 14.614    | 290717 | 13660  | 50.089 |      |      |      |
| 2     | 17.101    | 289683 | 12167  | 49.911 |      | M    |      |
| Total |           | 580401 | 25828  |        |      |      |      |

<Chromatogram>  
mAU

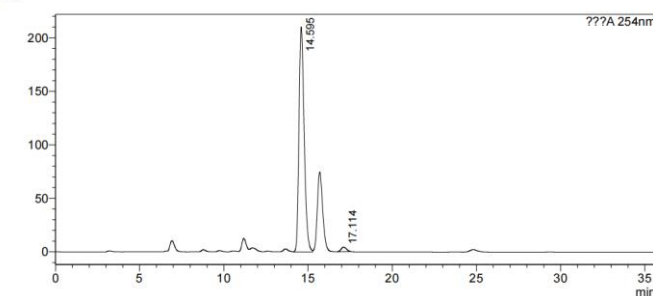

<Peak Table>

| Peak# | Ret. Time | Area    | Height | Conc.  | Unit | Mark | Name |
|-------|-----------|---------|--------|--------|------|------|------|
| 1     | 14.595    | 4518034 | 210163 | 97.963 |      |      |      |
| 2     | 17.114    | 93932   | 4227   | 2.037  |      | M    |      |
| Total |           | 4611966 | 214389 |        |      |      |      |

<Chromatogram>  
mAU

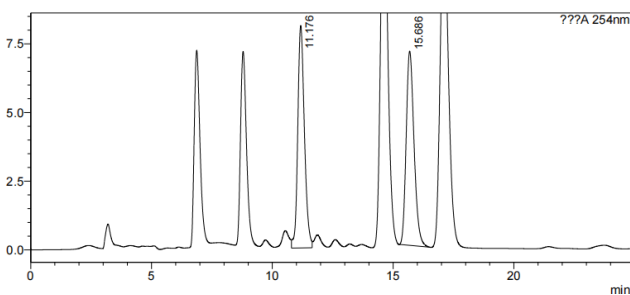

<Peak Table>

| Peak# | Ret. Time | Area   | Height | Conc.  | Unit | Mark | Name |
|-------|-----------|--------|--------|--------|------|------|------|
| 1     | 11.176    | 154895 | 8090   | 49.181 |      | M    |      |
| 2     | 15.686    | 160053 | 7067   | 50.819 |      | M    |      |
| Total |           | 314948 | 15157  |        |      |      |      |

<Chromatogram>  
mAU

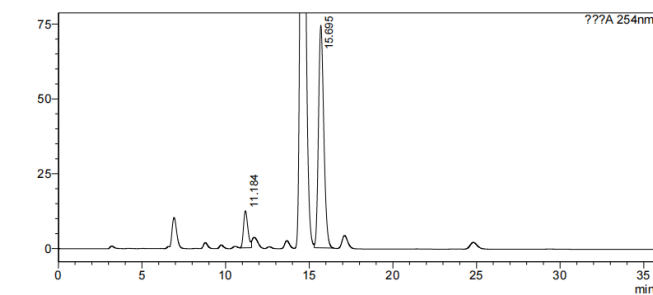

<Peak Table>

| Peak# | Ret. Time | Area    | Height | Conc.  | Unit | Mark | Name |
|-------|-----------|---------|--------|--------|------|------|------|
| 1     | 11.184    | 226643  | 12300  | 12.081 |      | M    |      |
| 2     | 15.695    | 1649377 | 74275  | 87.919 |      | M    |      |
| Total |           | 1876020 | 86576  |        |      |      |      |

**(S)-5-((R)-(2-ethynylcyclohex-1-en-1-yl)(4-(trifluoromethoxy)phenyl)methyl)-5-methyl-2-phenylthiazol-4(5H)-one: 3m**

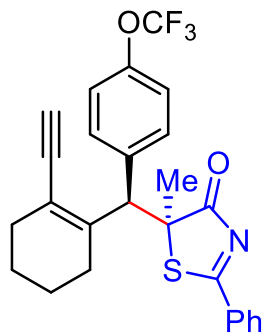

Yellow liquid. 38 mg, 81% yield, 1.4:1 dr, 98.2:1.8 er, 91.6:8.4 er.

<sup>1</sup>H NMR (600 MHz, CDCl<sub>3</sub>): δ 8.11 (d, *J* = 7.8 Hz, 1.40H, minor), 8.08 (d, *J* = 7.2 Hz, 2.00H, major), 7.68-7.65 (m, 1.60H), 7.53-7.50 (m, 4.90H), 7.31 (d, *J* = 7.8 Hz, 2.00H, major), 7.17 (d, *J* = 8.4 Hz, 1.40H, minor), 6.99 (d, *J* = 8.4 Hz, 2.00H, major), 5.31 (s, 1.00H, major), 5.19 (s, 0.70H, minor), 3.29 (s, 1.70H), 2.37-2.26 (m, 6.20H), 2.14-2.05 (m, 2.00H), 1.74 (s, 3.00H, major), 1.72 (s, 2.10H, minor), 1.69-1.64 (m, 2.40H), 1.52-1.42 (m, 3.00H). <sup>13</sup>C NMR (151 MHz, CDCl<sub>3</sub>): δ 195.2, 194.4, 194.3, 193.6, 148.4, 148.2, 143.8, 142.2, 137.7, 136.9, 135.1, 135.0, 132.1, 132.0, 130.4, 129.9, 129.1, 129.0, 128.8, 128.7, 121.2, 120.8, 120.5, 119.7, 84.0, 83.3, 82.1, 81.8, 67.2, 66.3, 57.0, 56.2, 30.6, 30.5, 30.1, 29.7, 27.9, 27.3, 26.7, 26.0, 22.5, 22.4, 22.0, 21.7. <sup>19</sup>F NMR (566 MHz, CDCl<sub>3</sub>): δ -57.8. HRMS (ESI) calcd for C<sub>26</sub>H<sub>23</sub>F<sub>3</sub>NO<sub>2</sub>S [(M+H<sup>+</sup>)]: 470.1396, found: 470.1395.

HPLC analysis of the product: Daicel Chiralpak IC-3 column; hexane/2-propanol = 95/5, 0.3 mL/min. Retention times: for major product: 44.85 min (major), 61.80 min (minor); for minor product: 40.57 min (minor), 58.11 min (major).

<Chromatogram>  
mAU

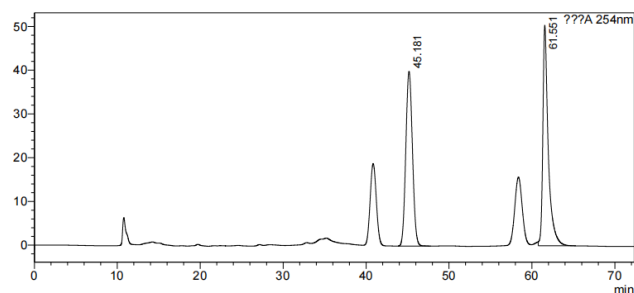

<Peak Table>

| Peak# | Ret. Time | Area    | Height | Conc.  | Unit | Mark | Name |
|-------|-----------|---------|--------|--------|------|------|------|
| 1     | 45.181    | 2221704 | 39928  | 49.273 |      |      |      |
| 2     | 61.551    | 2287255 | 50371  | 50.727 |      | M    |      |
| Total |           | 4508959 | 90300  |        |      |      |      |

<Chromatogram>  
mAU

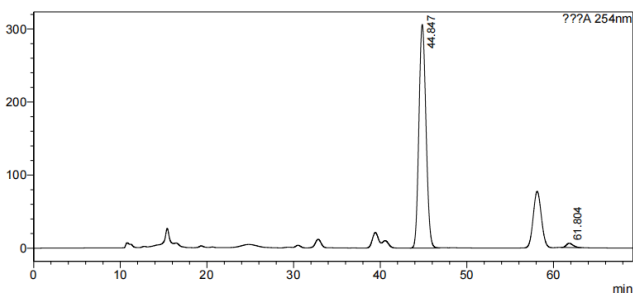

<Peak Table>

| Peak# | Ret. Time | Area     | Height | Conc.  | Unit | Mark | Name |
|-------|-----------|----------|--------|--------|------|------|------|
| 1     | 44.847    | 17351346 | 306040 | 98.122 |      | M    |      |
| 2     | 61.804    | 332089   | 5996   | 1.878  |      | M    |      |
| Total |           | 17683435 | 312036 |        |      |      |      |

<Chromatogram>  
mAU

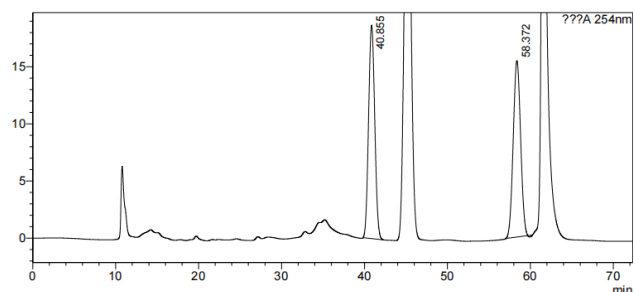

<Peak Table>

| Peak# | Ret. Time | Area    | Height | Conc.  | Unit | Mark | Name |
|-------|-----------|---------|--------|--------|------|------|------|
| 1     | 40.855    | 966423  | 18690  | 50.341 |      | M    |      |
| 2     | 58.372    | 953329  | 15432  | 49.659 |      | M    |      |
| Total |           | 1919753 | 34122  |        |      |      |      |

<Chromatogram>  
mAU

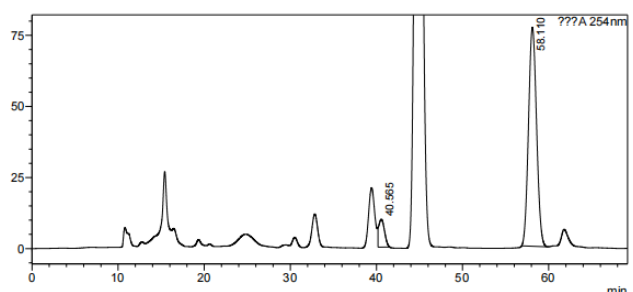

<Peak Table>

| Peak# | Ret. Time | Area    | Height | Conc.  | Unit | Mark | Name |
|-------|-----------|---------|--------|--------|------|------|------|
| 1     | 40.565    | 454738  | 9784   | 8.354  |      | M    |      |
| 2     | 58.110    | 4988752 | 78951  | 91.646 |      | M    |      |
| Total |           | 5443490 | 86735  |        |      |      |      |

**(S)-5-((R)-(4-ethylphenyl)(2-ethynylcyclohex-1-en-1-yl)methyl)-5-methyl-2-phenylthiazol-4(5H)-one: 3n**

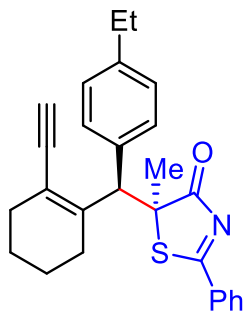

Light yellow liquid. 38 mg, 92% yield, 3.2:1 dr, 98:2 er, 84.6:15.4 er.

$^1\text{H}$  NMR (600 MHz,  $\text{CDCl}_3$ ):  $\delta$  8.14 (d,  $J = 7.2$  Hz, 0.60H, minor), 8.10 (d,  $J = 7.8$  Hz, 2.00H, major), 7.67-7.63 (m, 1.30H), 7.53-7.48 (m, 2.60H), 7.37 (d,  $J = 7.8$  Hz, 0.60H, minor), 7.19 (d,  $J = 7.8$  Hz, 2.00H, major), 7.16 (d,  $J = 7.8$  Hz, 0.60H, minor), 6.97 (d,  $J = 8.4$  Hz, 2.00H, major), 5.29 (s, 1.00H, major), 5.16 (s, 0.30H, minor), 3.28 (s, 0.30H, minor), 3.27 (s, 1.00H, major), 2.63 (q,  $J = 15.0$  and 7.2 Hz, 0.60H, minor), 2.50 (q,  $J = 15.6$  and 7.8 Hz, 2.00H, major), 2.36-2.32 (m, 2.00H), 2.29-2.19 (m, 3.00H), 2.16-2.09 (m, 0.50H), 1.73 (s, 3.00H, major), 1.71 (s, 0.90H, minor), 1.68-1.60 (m, 3.90H), 1.50-1.39 (m, 1.00H), 1.23 (t,  $J = 7.8$  Hz, 0.90H, minor), 1.12 (t,  $J = 7.2$  Hz, 3.00H, major).  $^{13}\text{C}$  NMR (151 MHz,  $\text{CDCl}_3$ ):  $\delta$  195.4, 194.6, 194.3, 193.8, 144.5, 143.2, 143.0, 142.9, 136.2, 135.4, 134.80, 134.78, 132.31, 132.26, 129.0, 128.9, 128.73, 128.70, 128.3, 127.9, 127.7, 120.4, 118.8, 115.1, 84.2, 83.6, 81.6, 81.4, 67.6, 66.5, 57.3, 56.5, 30.6, 30.5, 28.3, 28.2, 28.1, 27.4, 26.7, 26.0, 22.5, 22.4, 22.1, 21.8, 15.2, 15.1. HRMS (ESI) calcd for  $\text{C}_{27}\text{H}_{28}\text{NOS}$  [(M+H) $^+$ ]: 414.1886, found: 414.1881. HPLC analysis of the product: Daicel Chiralpak IA-3 column; hexane/2-propanol = 95/5, 0.5 mL/min. Retention times: for major product: 45.24 min (major), 54.97 min (minor); for minor product: 25.44 min (minor), 40.18 min (major).

<Chromatogram>  
mAU

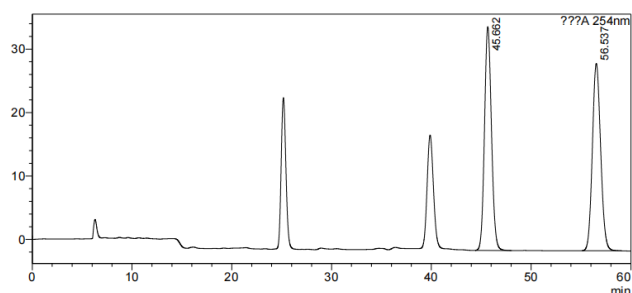

<Peak Table>

| Peak# | Ret. Time | Area    | Height | Conc.  | Unit | Mark | Name |
|-------|-----------|---------|--------|--------|------|------|------|
| 1     | 45.662    | 1709436 | 35264  | 50.064 |      |      |      |
| 2     | 56.537    | 1705046 | 29523  | 49.936 |      |      |      |
| Total |           | 3414482 | 64788  |        |      |      |      |

<Chromatogram>  
mAU

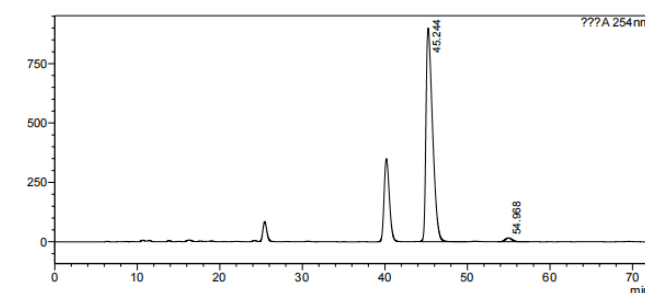

<Peak Table>

| Peak# | Ret. Time | Area     | Height | Conc.  | Unit | Mark | Name |
|-------|-----------|----------|--------|--------|------|------|------|
| 1     | 45.244    | 49802495 | 899017 | 98.141 |      |      |      |
| 2     | 54.968    | 943227   | 15990  | 1.859  |      |      |      |
| Total |           | 50745722 | 915006 |        |      |      |      |

<Chromatogram>  
mAU

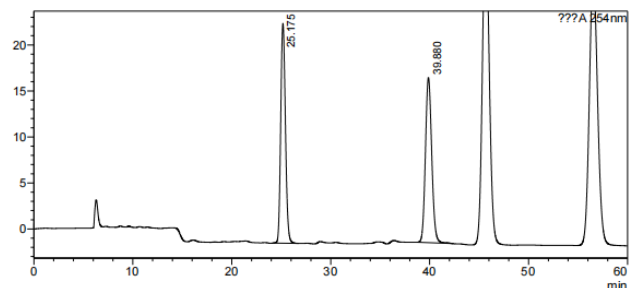

<Peak Table>

| Peak# | Ret. Time | Area    | Height | Conc.  | Unit | Mark | Name |
|-------|-----------|---------|--------|--------|------|------|------|
| 1     | 25.175    | 786487  | 23863  | 49.694 |      | M    |      |
| 2     | 39.880    | 796157  | 17928  | 50.306 |      | M    |      |
| Total |           | 1582644 | 41791  |        |      |      |      |

<Chromatogram>  
mAU

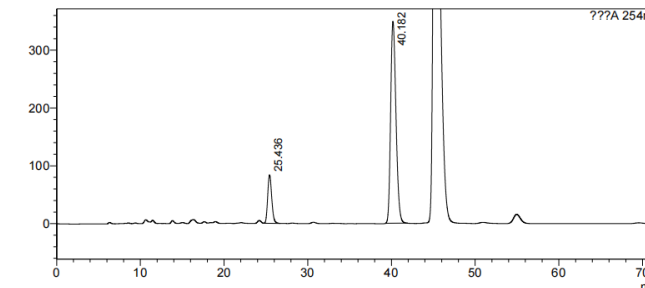

<Peak Table>

| Peak# | Ret. Time | Area     | Height | Conc.  | Unit | Mark | Name |
|-------|-----------|----------|--------|--------|------|------|------|
| 1     | 25.436    | 2797969  | 83772  | 15.356 |      | M    |      |
| 2     | 40.182    | 1542237  | 349115 | 84.644 |      | M    |      |
| Total |           | 18220206 | 432887 |        |      |      |      |

**(S)-5-((R)-(2-ethynylcyclohex-1-en-1-yl)(4-pentylphenyl)methyl)-5-methyl-2-phenylthiazol-4(SH)-one: 3o**

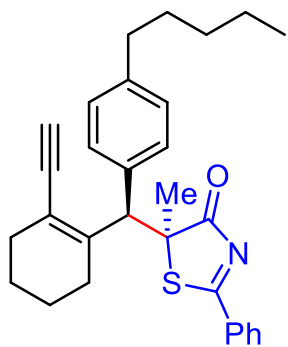

Yellow liquid. 29 mg, 64% yield, 3:1 dr, 97.7:2.3 er, 85.3:14.7 er.

<sup>1</sup>H NMR (600 MHz, CDCl<sub>3</sub>): δ 8.13 (d, *J* = 7.8 Hz, 0.66H, minor), 8.09 (d, *J* = 7.8 Hz, 2.00H, major), 7.67-7.63 (m, 1.33H), 7.53-7.48 (m, 2.66H), 7.35 (d, *J* = 7.2 Hz, 0.66H, minor), 7.16 (d, *J* = 7.8 Hz, 2.00H, major), 7.13 (d, *J* = 7.8 Hz, 0.66H, minor), 6.94 (d, *J* = 7.2 Hz, 2.00H, major), 5.28 (s, 1.00H, major), 5.15 (s, 0.33 H, minor), 3.28 (s, 0.33H, minor), 3.26 (s, 1.00H, major), 2.57 (t, *J* = 7.2 Hz, 0.66H, minor), 2.44 (t, *J* = 7.8 Hz, 2.00H, major), 2.36-2.10 (m, 6.00H), 1.73 (s, 3.00H, major), 1.71 (s, 0.99H, minor), 1.68-1.60 (m, 4.00H), 1.51-1.46 (m, 2.62H), 1.32-1.19 (m, 6.00H), 0.89 (t, *J* = 6.0 Hz, 0.99H, minor), 0.83 (t, *J* = 7.2 Hz, 3.00H, major). <sup>13</sup>C NMR (151 MHz, CDCl<sub>3</sub>): δ 195.5, 194.7, 194.4, 193.8, 144.6, 143.0, 142.0, 141.7, 136.1, 135.3, 134.80, 134.77, 132.33, 132.29, 129.4, 129.0, 128.92, 128.87, 128.7, 128.5, 128.23, 128.22, 120.4, 118.9, 84.3, 83.6, 81.6, 81.3, 67.7, 66.6, 57.4, 56.6, 35.5, 35.3, 31.6, 31.4, 30.9, 30.8, 30.7, 30.5, 28.1, 27.3, 26.8, 26.1, 22.6, 22.53, 22.51, 22.4, 22.1, 21.8, 14.01, 13.95. HRMS (ESI) calcd for C<sub>30</sub>H<sub>34</sub>NOS [(M+H)<sup>+</sup>]: 456.2356, found: 456.2355. HPLC analysis of the product: Daicel Chiralpak IC-3 column; hexane/2-propanol = 95/5, 0.8 mL/min. Retention times: for major product: 40.26 min (major), 78.86 min (minor); for minor product: 22.16 min (minor), 34.55 min (major).

<Chromatogram>  
mAU

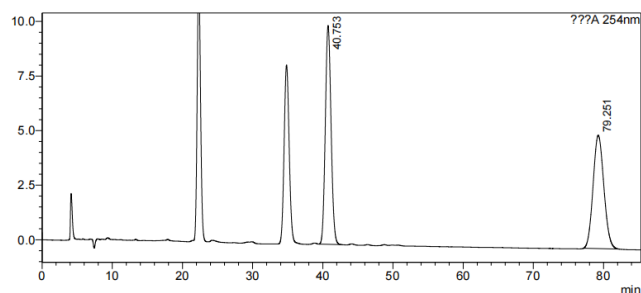

<Peak Table>

| Peak# | Ret. Time | Area    | Height | Conc.  | Unit | Mark | Name |
|-------|-----------|---------|--------|--------|------|------|------|
| 1     | 40.753    | 568626  | 10021  | 50.630 |      |      |      |
| 2     | 79.251    | 554481  | 5194   | 49.370 |      |      |      |
| Total |           | 1123107 | 15215  |        |      |      |      |

<Chromatogram>  
mAU

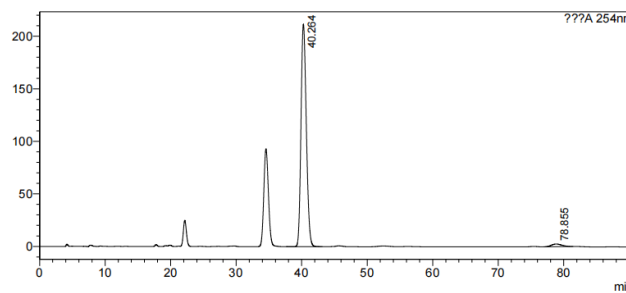

<Peak Table>

| Peak# | Ret. Time | Area     | Height | Conc.  | Unit | Mark | Name |
|-------|-----------|----------|--------|--------|------|------|------|
| 1     | 40.264    | 11935913 | 211643 | 97.653 |      | M    |      |
| 2     | 78.855    | 286899   | 2620   | 2.347  |      |      |      |
| Total |           | 12222812 | 214263 |        |      |      |      |

<Chromatogram>  
mAU

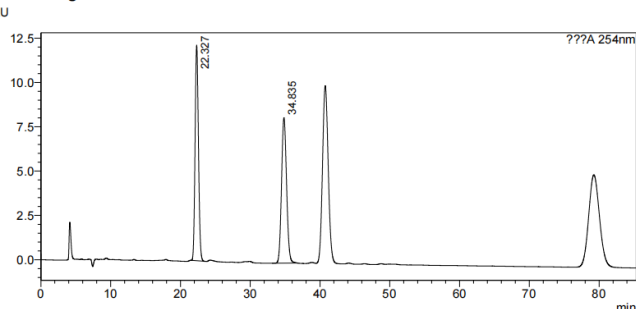

<Peak Table>

| Peak# | Ret. Time | Area   | Height | Conc.  | Unit | Mark | Name |
|-------|-----------|--------|--------|--------|------|------|------|
| 1     | 22.327    | 406291 | 12153  | 49.705 |      | M    |      |
| 2     | 34.835    | 411109 | 8198   | 50.295 |      | M    |      |
| Total |           | 817401 | 20351  |        |      |      |      |

<Chromatogram>  
mAU

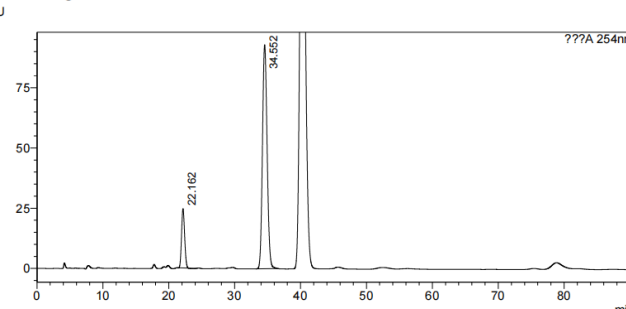

<Peak Table>

| Peak# | Ret. Time | Area    | Height | Conc.  | Unit | Mark | Name |
|-------|-----------|---------|--------|--------|------|------|------|
| 1     | 22.162    | 786988  | 24555  | 14.714 |      | M    |      |
| 2     | 34.552    | 4561745 | 92957  | 85.286 |      | M    |      |
| Total |           | 5348733 | 117512 |        |      |      |      |

**(S)-5-((R)-(4-(tert-butyl)phenyl)(2-ethynylcyclohex-1-en-1-yl)methyl)-5-methyl-2-phenylthiazol-4(5H)-one: 3p**

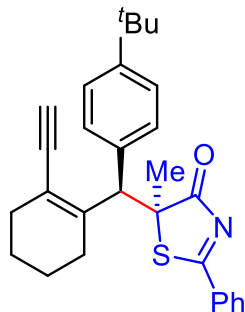

Yellow liquid. 28 mg, 63% yield, 3.2:1 dr, 98.5:1.5 er, 88:12 er.

<sup>1</sup>H NMR (600 MHz, CDCl<sub>3</sub>): δ 8.13 (d, *J* = 7.8 Hz, 0.62H, minor), 8.10 (d, *J* = 7.8 Hz, 2.00H, major), 7.67-7.63 (m, 1.31H), 7.53-7.48 (m, 2.62H), 7.39-7.37 (m, 0.62H), 7.34-7.32 (m, 0.62H), 7.18-7.14 (m, 4.00H), 5.30 (s, 1.00H, major), 5.17 (s, 0.31H, minor), 3.28 (s, 0.31H, minor), 3.26 (s, 1.00H, major), 2.36-2.20 (m, 5.48H), 1.73 (s, 3.00H, major), 1.71 (s, 0.93H, minor), 1.69-1.61 (m, 4.00H), 1.49-1.41 (m, 1.00H), 1.31 (s, 2.79H, minor), 1.19 (s, 9.00H, major). <sup>13</sup>C NMR (151 MHz, CDCl<sub>3</sub>): δ 195.5, 194.6, 194.3, 193.8, 150.0, 149.6, 144.5, 143.0, 135.8, 135.1, 134.78, 134.76, 132.33, 132.29, 129.0, 128.9, 128.7, 128.6, 127.9, 125.4, 125.1, 120.4, 118.8, 114.8, 84.2, 83.6, 81.5, 81.3, 67.7, 66.4, 57.2, 56.3, 34.4, 34.2, 31.3, 31.2, 30.6, 30.5, 28.2, 27.4, 26.7, 26.0, 22.5, 22.4, 22.1, 21.8. HRMS (ESI) calcd for C<sub>29</sub>H<sub>32</sub>NOS [(M+H<sup>+</sup>)]: 442.2199, found: 442.2196. HPLC analysis of the product: Daicel Chiralpak ADH column; hexane/2-propanol = 95/5, 0.5 mL/min. Retention times: for major product: 30.31 min (major), 33.78 min (minor); for minor product: 18.12 min (minor), 27.46 min (major).

<Chromatogram>  
mV

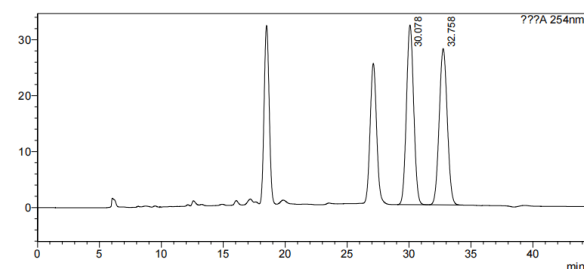

<Peak Table>

| Peak# | Ret. Time | Area    | Height | Conc.  | Unit | Mark | Name |
|-------|-----------|---------|--------|--------|------|------|------|
| 1     | 30.078    | 1306408 | 32127  | 50.710 |      |      |      |
| 2     | 32.758    | 1269844 | 27947  | 49.290 |      |      |      |
| Total |           | 2576252 | 60074  |        |      |      |      |

<Chromatogram>  
mV

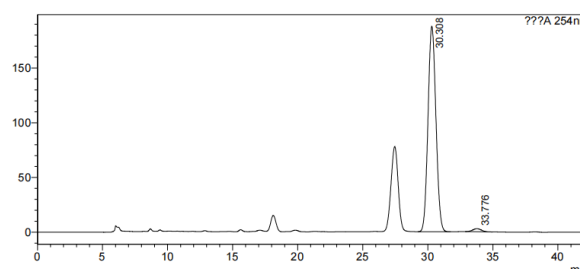

<Peak Table>

| Peak# | Ret. Time | Area    | Height | Conc.  | Unit | Mark | Name |
|-------|-----------|---------|--------|--------|------|------|------|
| 1     | 30.308    | 7953685 | 187839 | 98.408 |      |      |      |
| 2     | 33.776    | 128682  | 2812   | 1.592  |      |      |      |
| Total |           | 8082366 | 190652 |        |      |      |      |

<Chromatogram>  
mV

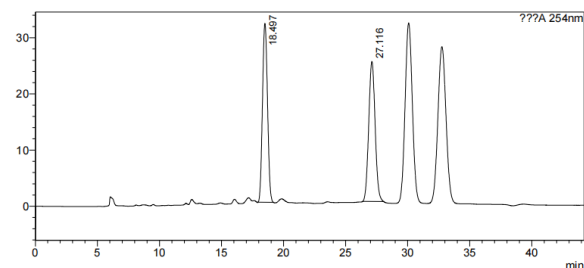

<Peak Table>

| Peak# | Ret. Time | Area    | Height | Conc.  | Unit | Mark | Name |
|-------|-----------|---------|--------|--------|------|------|------|
| 1     | 18.497    | 895062  | 31822  | 50.021 |      | M    |      |
| 2     | 27.116    | 894302  | 24930  | 49.979 |      | M    |      |
| Total |           | 1789364 | 56752  |        |      |      |      |

<Chromatogram>  
mV

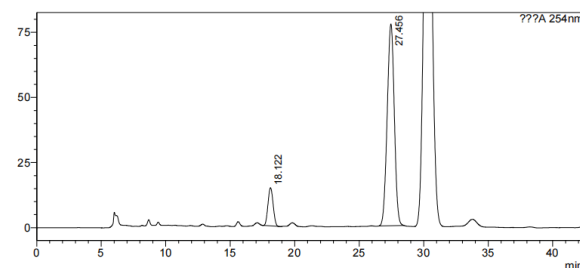

<Peak Table>

| Peak# | Ret. Time | Area    | Height | Conc.  | Unit | Mark | Name |
|-------|-----------|---------|--------|--------|------|------|------|
| 1     | 18.122    | 404908  | 14626  | 12.006 |      | M    |      |
| 2     | 27.456    | 2967627 | 77470  | 87.994 |      | M    |      |
| Total |           | 3372536 | 92096  |        |      |      |      |

**(S)-5-((R)-(3,5-dimethylphenyl)(2-ethynylcyclohex-1-en-1-yl)methyl)-5-methyl-2-phenylthiazol-4(5H)-one: 3q**

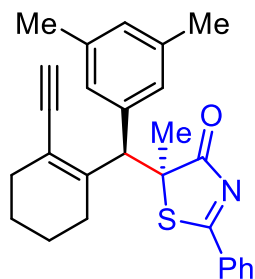

Colorless liquid. 33 mg, 80% yield, 1.2:1 dr, 96.5:3.5 er, 80.2:19.8 er.

$^1\text{H}$  NMR (600 MHz,  $\text{CDCl}_3$ ):  $\delta$  8.15 (d,  $J = 7.8$  Hz, 1.70H, minor), 8.09 (d,  $J = 7.8$  Hz, 2.00H, major), 7.68-7.63 (m, 1.85H), 7.53-7.48 (m, 3.70H), 7.04 (s, 1.70H, minor), 6.91 (s, 0.85H, minor), 6.90 (s, 2.00H, major), 6.75 (s, 1.00H, major), 5.23 (s, 1.00H, major), 5.12 (s, 0.85H, minor), 3.29 (s, 0.85H, minor), 3.28 (s, 1.00H, major), 2.36-2.35 (m, 1.00H), 2.32 (s, 5.10H, minor), 2.29-2.18 (m, 4.90H), 2.18-2.16 (m, 1.00H), 2.13 (s, 6.00H, major), 1.73 (s, 3.00H, major), 1.71 (s, 2.55H, minor), 1.69-1.53 (m, 4.30H), 1.50-1.38 (m, 2.60H), 1.32-1.27 (m, 1.00H).  $^{13}\text{C}$  NMR (151 MHz,  $\text{CDCl}_3$ ):  $\delta$  195.4, 194.7, 194.4, 193.8, 144.4, 143.0, 138.9, 138.1, 137.9, 137.4, 134.8, 134.7, 132.3, 132.2, 129.01, 128.97, 128.93, 128.88, 128.7, 128.6, 126.8, 126.2, 120.4, 118.8, 84.3, 83.7, 81.6, 81.3, 67.5, 66.6, 57.6, 56.8, 30.7, 30.6, 28.1, 27.2, 26.8, 26.2, 22.6, 22.4, 22.1, 21.8, 21.5, 21.4. HRMS (ESI) calcd for  $\text{C}_{27}\text{H}_{28}\text{NOS}$  [(M+H $^+$ ): 414.1886, found: 414.1885. HPLC analysis of the product: Daicel Chiralpak IC-3 column; hexane/2-propanol = 92/8, 1.0 mL/min. Retention times: for major product: 30.93 min (minor), 44.28 min (major); for minor product: 14.67 min (minor), 19.95 min (major).

<Chromatogram>  
mAU

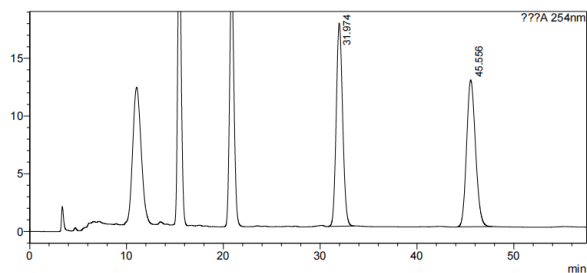

<Peak Table>

| Peak# | Ret. Time | Area    | Height | Conc.  | Unit | Mark | Name |
|-------|-----------|---------|--------|--------|------|------|------|
| 1     | 31.974    | 807574  | 17596  | 49.817 |      |      |      |
| 2     | 45.556    | 813502  | 12711  | 50.183 |      |      |      |
| Total |           | 1621076 | 30307  |        |      |      |      |

<Chromatogram>  
mAU

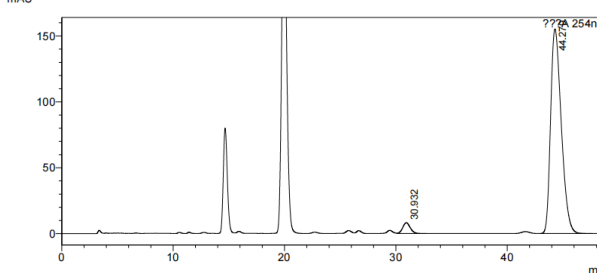

<Peak Table>

| Peak# | Ret. Time | Area     | Height | Conc.  | Unit | Mark | Name |
|-------|-----------|----------|--------|--------|------|------|------|
| 1     | 30.932    | 387878   | 8213   | 3.624  |      |      |      |
| 2     | 44.279    | 10313716 | 155276 | 96.376 |      |      |      |
| Total |           | 10701594 | 163489 |        |      |      |      |

<Chromatogram>  
mAU

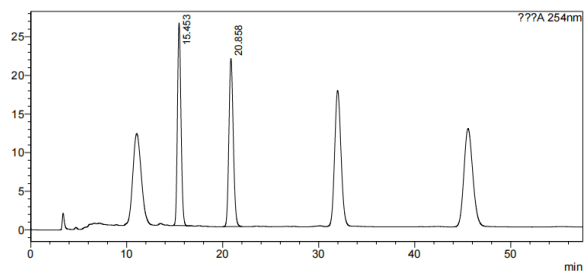

<Peak Table>

| Peak# | Ret. Time | Area    | Height | Conc.  | Unit | Mark | Name |
|-------|-----------|---------|--------|--------|------|------|------|
| 1     | 16.453    | 671413  | 26227  | 49.366 |      | M    |      |
| 2     | 20.858    | 688662  | 21749  | 50.634 |      | M    |      |
| Total |           | 1360075 | 47977  |        |      |      |      |

<Chromatogram>  
mAU

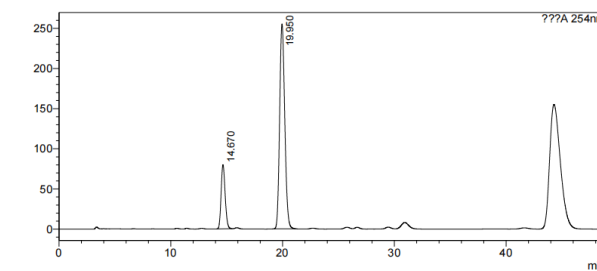

<Peak Table>

| Peak# | Ret. Time | Area     | Height | Conc.  | Unit | Mark | Name |
|-------|-----------|----------|--------|--------|------|------|------|
| 1     | 14.670    | 2003658  | 79793  | 19.840 |      | M    |      |
| 2     | 19.950    | 8095183  | 254957 | 80.160 |      | M    |      |
| Total |           | 10098841 | 334750 |        |      |      |      |

**(S)-5-((R)-(2-ethynylcyclohex-1-en-1-yl)(4-fluoro-3-methylphenyl)methyl)-5-methyl-2-phenylthiazol-4(5H)-one: 3r**

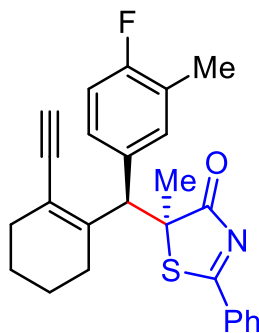

Yellow liquid. 37 mg, 85% yield, 2:1 dr, 97.7:2.3 er, 86:14 er.

<sup>1</sup>H NMR (600 MHz, CDCl<sub>3</sub>): δ 8.12 (d, *J* = 7.2 Hz, 1.12H, minor), 8.08 (d, *J* = 7.8 Hz, 2.00H, major), 7.68-7.65 (m, 1.56H), 7.53-7.48 (m, 3.12H), 7.23-7.22 (m, 1.12H), 7.11-7.09 (m, 2.00H), 6.96-6.93 (m, 0.56H), 6.76-6.73 (m, 1.00H), 5.23 (s, 1.00H, major), 5.11 (s, 0.56H, minor), 3.29 (s, 1.56H), 2.35-2.31 (m, 3.12H), 2.27 (s, 1.68H, minor), 2.23-2.13 (m, 3.12H), 2.11 (s, 3.00H, major), 1.72 (s, 3.00H, major), 1.71 (s, 1.68H, minor), 1.64-1.58 (m, 4.00H), 1.51-1.39 (m,

2.24H). <sup>13</sup>C NMR (151 MHz, CDCl<sub>3</sub>): δ 195.3, 194.5, 194.4, 193.7, 161.4, 161.3, 159.73, 159.65, 144.3, 142.7, 134.92, 134.91, 134.5 (d, *J* = 4.3 Hz, minor), 133.7 (d, *J* = 3.8 Hz, major), 132.21, 132.18, 132.11, 132.08, 128.9 (d, *J* = 47.0 Hz, minor), 128.8 (d, *J* = 44.1 Hz, major), 127.6 (d, *J* = 8.0 Hz, minor), 126.9 (d, *J* = 8.2 Hz, major), 124.8 (d, *J* = 17.7 Hz, minor), 124.4 (d, *J* = 17.8 Hz, major), 120.6, 119.1, 114.9 (d, *J* = 22.8 Hz, minor), 114.5 (d, *J* = 21.7 Hz, major), 84.1, 83.5, 81.9, 81.6, 67.6, 66.6, 57.0, 56.3, 30.6, 30.5, 27.9, 27.2, 26.7, 26.0, 22.5, 22.4, 22.0, 21.8, 14.8 (d, *J* = 3.0 Hz, minor), 14.6 (d, *J* = 3.2 Hz, major). <sup>19</sup>F NMR (566 MHz, CDCl<sub>3</sub>): δ -119.4 (minor), -119.7 (major). HRMS (ESI) calcd for C<sub>26</sub>H<sub>25</sub>FNOS [(M+H<sup>+</sup>)]: 418.1635, found: 418.1634. HPLC analysis of the product: Daicel Chiralpak IC-3 column; hexane/2-propanol = 95/5, 0.5 mL/min. Retention times: for major product: 34.90 min (major), 47.44 min (minor); for minor product: 29.58 min (minor), 40.70 min (major).

<Chromatogram>  
mV

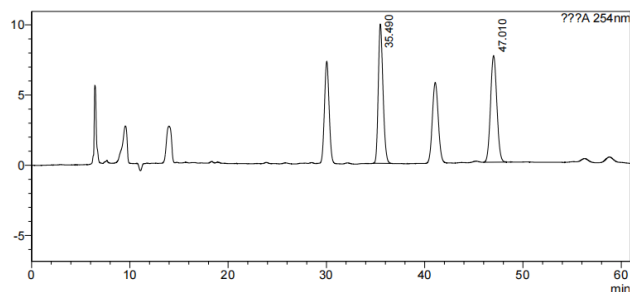

<Peak Table>

| Peak# | Ret. Time | Area   | Height | Conc.  | Unit | Mark | Name |
|-------|-----------|--------|--------|--------|------|------|------|
| 1     | 35.490    | 332177 | 9930   | 49.572 |      |      |      |
| 2     | 47.010    | 337912 | 7591   | 50.428 |      |      |      |
| Total |           | 670090 | 17521  |        |      |      |      |

<Chromatogram>  
mV

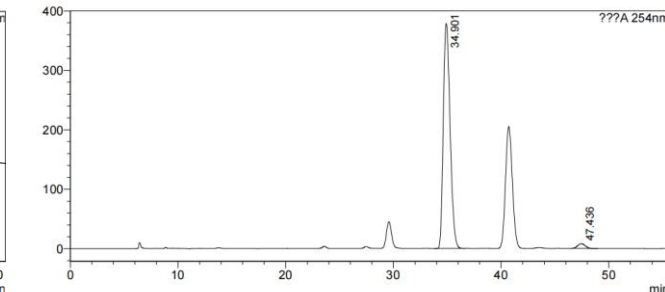

<Peak Table>

| Peak# | Ret. Time | Area     | Height | Conc.  | Unit | Mark | Name |
|-------|-----------|----------|--------|--------|------|------|------|
| 1     | 34.901    | 16608001 | 378665 | 97.663 |      |      |      |
| 2     | 47.436    | 397399   | 8003   | 2.337  |      | M    |      |
| Total |           | 17005399 | 386668 |        |      |      |      |

<Chromatogram>  
mV

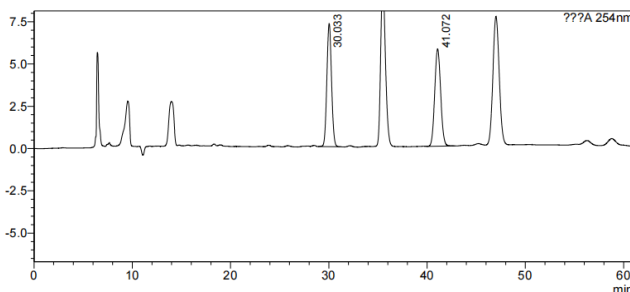

<Peak Table>

| Peak# | Ret. Time | Area   | Height | Conc.  | Unit | Mark | Name |
|-------|-----------|--------|--------|--------|------|------|------|
| 1     | 30.033    | 240782 | 7278   | 49.902 |      | M    |      |
| 2     | 41.072    | 241724 | 5750   | 50.098 |      | M    |      |
| Total |           | 482506 | 13028  |        |      |      |      |

<Chromatogram>  
mV

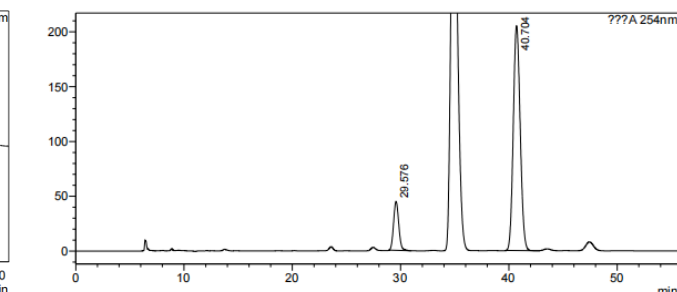

<Peak Table>

| Peak# | Ret. Time | Area     | Height | Conc.  | Unit | Mark | Name |
|-------|-----------|----------|--------|--------|------|------|------|
| 1     | 29.576    | 1488774  | 44688  | 14.077 |      | M    |      |
| 2     | 40.704    | 9087167  | 205141 | 85.923 |      | M    |      |
| Total |           | 10575941 | 249829 |        |      |      |      |



**(S)-5-((S)-(2-ethynylcyclohex-1-en-1-yl)(naphthalen-1-yl)methyl)-5-methyl-2-phenylthiazol-4(5H)-one: 3s**

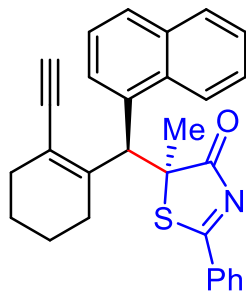

White solid. 29 mg, 67% yield, 2.6:1 dr, 97.5:2.5 er.

$^1\text{H}$  NMR (600 MHz,  $\text{CDCl}_3$ ):  $\delta$  8.54 (d,  $J = 9.0$  Hz, 1H), 8.16 d,  $J = 7.2$  Hz, 2H), 7.76 (d,  $J = 8.4$  Hz, 1H), 7.70-7.67 (m, 1H), 7.65 (d,  $J = 8.4$  Hz, 1H), 7.62 d,  $J = 7.2$  Hz, 1H), 7.56-7.52 (m, 3H), 7.46-7.44 (m, 1H), 7.20-7.18 (m, 1H), 6.02 (s, 1H), 3.48 (s, 1H), 2.44-2.36 (m, 2H), 2.30-2.26 (m, 1H), 1.98 (s, 3H), 1.85-1.82 (m, 1H), 1.66-1.59 (m, 2H), 1.52-1.44 (m, 2H).  $^{13}\text{C}$  NMR (151 MHz,  $\text{CDCl}_3$ ):  $\delta$  194.6, 193.5, 143.1, 135.1, 134.9, 134.0, 132.5, 132.4, 129.0, 128.8, 128.6, 128.0, 126.2, 125.5, 124.5, 124.4, 124.0, 120.7, 84.8, 82.5, 68.3, 50.4, 30.8, 29.5, 26.8, 22.4, 22.0. HRMS (ESI) calcd for  $\text{C}_{29}\text{H}_{26}\text{NOS}$  [ $\text{M}+\text{H}^+$ ]: 436.1730, found: 436.1726. HPLC analysis of the product: Daicel Chiralpak IC-3 column; hexane/2-propanol = 95/5, 0.5 mL/min. Retention times: 24.41 min (major), 28.20 min (minor).

<Chromatogram>  
mAU

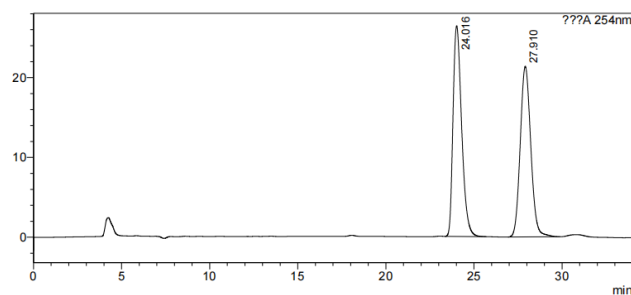

<Peak Table>

| Peak# | Ret. Time | Area    | Height | Conc.  | Unit | Mark | Name |
|-------|-----------|---------|--------|--------|------|------|------|
| 1     | 24.016    | 897549  | 26385  | 50.257 |      |      |      |
| 2     | 27.910    | 888352  | 21361  | 49.743 |      |      |      |
| Total |           | 1785902 | 47746  |        |      |      |      |

<Chromatogram>  
mAU

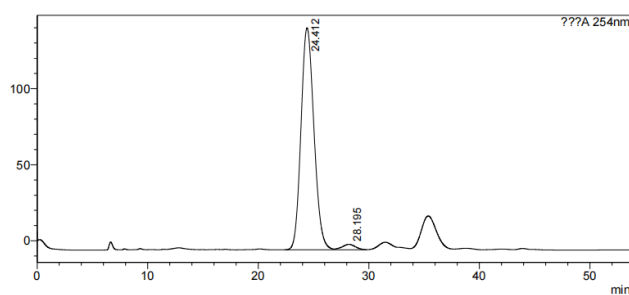

<Peak Table>

| Peak# | Ret. Time | Area     | Height | Conc.  | Unit | Mark | Name |
|-------|-----------|----------|--------|--------|------|------|------|
| 1     | 24.412    | 11888942 | 145915 | 97.543 |      |      |      |
| 2     | 28.195    | 299448   | 3550   | 2.457  |      | V    |      |
| Total |           | 12188390 | 149465 |        |      |      |      |

**(S)-5-((R)-1-(1-ethynyl-3,4-dihydronaphthalen-2-yl)ethyl)-5-methyl-2-phenylthiazol-4(5H)-one: 3t**

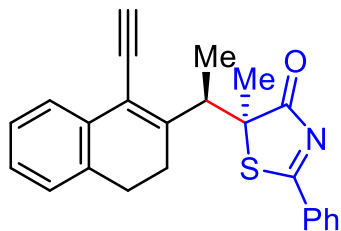

Yellow solid. 36 mg, 97% yield, 8.2:1 dr, 87:13 er.

$^1\text{H}$  NMR (600 MHz,  $\text{CDCl}_3$ ):  $\delta$  8.17 (d,  $J = 7.8$  Hz, 2.00H, major), 8.11 (d,  $J = 7.8$  Hz, 0.24H, minor), 7.87-7.80 (m, 0.24H), 7.68-7.65 (m, 2.00H), 7.63-7.59 (m, 0.24H), 7.53-7.50 (m, 2.24H), 7.26-7.24 (m, 1.12H), 7.19-7.17 (m, 1.00H), 7.14-7.11 (m, 1.00H), 4.22 (q,  $J = 13.2$  and 6.6 Hz, 1.00H, major), 4.01 (q,  $J = 13.2$  and 6.6 Hz, 0.12H, minor), 3.49 (s, 1.00H, major), 3.40 (s, 0.12H, minor), 2.81-2.75 (m, 2.00H), 2.72-2.60 (m, 0.48H), 2.44-2.38 (m, 1.00H), 2.36-2.29 (m, 1.00H), 1.82 (s, 0.36H, minor), 1.67 (s, 3.00H, major), 1.28 (d,  $J = 7.2$  Hz, 0.36H, minor), 1.06 (d,  $J = 6.6$  Hz, 3.00H, major).  $^{13}\text{C}$  NMR (151 MHz,  $\text{CDCl}_3$ ):  $\delta$  195.9, 195.1, 194.2, 193.9, 149.1, 147.3, 135.04, 135.00, 134.9, 134.4, 132.7, 132.6, 132.2, 130.3, 129.01, 128.97, 128.8, 128.7, 127.6, 127.5, 126.9, 126.83, 126.77, 126.5, 125.8, 125.7, 119.9, 119.5, 84.6, 84.5, 80.3, 79.7, 68.4, 68.2, 46.5, 45.7, 27.55, 27.51, 25.8, 24.7, 24.4, 23.8, 14.4, 14.2. HRMS (ESI) calcd for  $\text{C}_{24}\text{H}_{22}\text{NOS}$  [(M+H $^+$ )]: 372.1417, found: 372.1410. HPLC analysis of the product: Daicel Chiralpak ADH column; hexane/2-propanol = 95/5, 0.5 mL/min. Retention times: 27.14 min (minor), 38.51 min (major).

<Chromatogram>

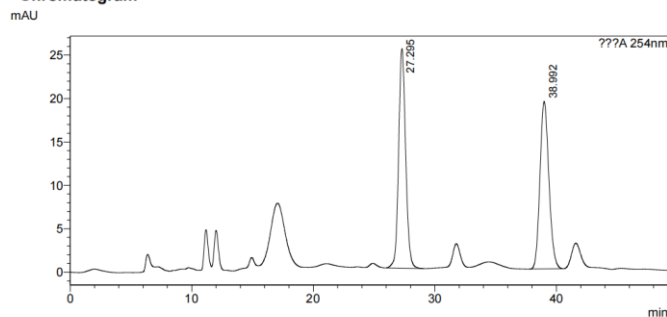

<Peak Table>

| Peak# | Ret. Time | Area    | Height | Conc.  | Unit | Mark | Name |
|-------|-----------|---------|--------|--------|------|------|------|
| 1     | 27.295    | 1015383 | 25283  | 50.680 |      |      |      |
| 2     | 38.992    | 988138  | 19290  | 49.320 |      |      |      |
| Total |           | 2003521 | 44573  |        |      |      |      |

<Chromatogram>

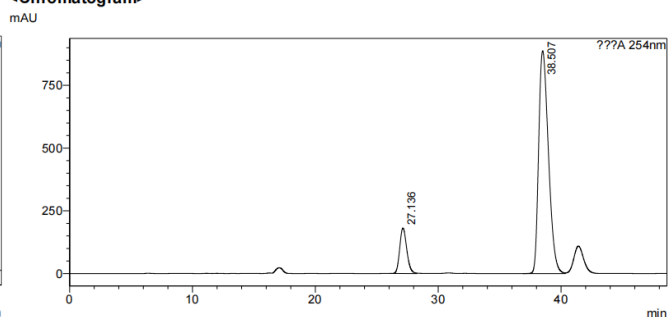

<Peak Table>

| Peak# | Ret. Time | Area     | Height  | Conc.  | Unit | Mark | Name |
|-------|-----------|----------|---------|--------|------|------|------|
| 1     | 27.136    | 7232185  | 181489  | 12.850 |      | M    |      |
| 2     | 38.507    | 49047528 | 887577  | 87.150 |      |      |      |
| Total |           | 56279714 | 1069066 |        |      |      |      |

**(S)-5-((R)-1-(2-ethynylcyclohept-1-en-1-yl)ethyl)-5-methyl-2-phenylthiazol-4(5H)-one: 3u**

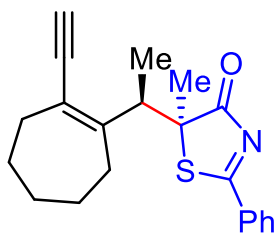

Light yellow solid. 30 mg, 89% yield, 7.5:1 dr, 89:11 er, 88.5:11.5 er.

<sup>1</sup>H NMR (600 MHz, CDCl<sub>3</sub>): δ 8.17 (d, *J* = 7.8 Hz, 2.00H, major), 8.11 (d, *J* = 7.8 Hz, 0.26H, minor), 7.68-7.65 (m, 1.13H), 7.53-7.51 (m, 2.26H), 3.99 (q, *J* = 13.2 and 6.0 Hz, 1.00H, major), 3.77 (q, *J* = 13.8 and 7.2 Hz, 0.13H, minor), 3.32 (s, 1.00H, major), 3.21 (s, 0.13H, minor), 2.49-2.33 (m, 3.00H), 2.31-2.29 (m, 2.10H), 1.81-1.77 (m, 2.35H), 1.75 (s, 0.39H, minor), 1.66 (s, 3.00H, major), 1.60-1.57 (m, 1.00H), 1.53-1.43 (m, 2.85H), 1.22 (d, *J* = 6.6 Hz, 0.39H, minor), 0.93 (d, *J* = 6.6 Hz, 3.00H, major).  
<sup>13</sup>C NMR (151 MHz, CDCl<sub>3</sub>): δ 196.4, 195.2, 194.2, 193.9, 152.9, 150.9, 134.9, 134.7, 132.3, 132.2, 129.0, 128.9, 128.8, 128.7, 124.9, 124.3, 85.5, 85.0, 82.1, 81.9, 68.7, 68.5, 47.1, 46.4, 34.80, 34.76, 32.5, 32.4, 29.0, 28.5, 26.7, 26.6, 26.1, 25.9, 25.8, 24.3, 14.0, 13.9. HRMS (ESI) calcd for C<sub>21</sub>H<sub>24</sub>NOS [(M+H<sup>+</sup>)]: 338.1537, found: 338.1569. HPLC analysis of the product: Daicel Chiralpak ADH column; hexane/2-propanol = 95/5, 0.3 mL/min. Retention times: for major product: 33.93 min (minor), 50.64 min (major); for minor product: 43.07 min (major), 59.39 min (minor).

<Chromatogram>  
mAU

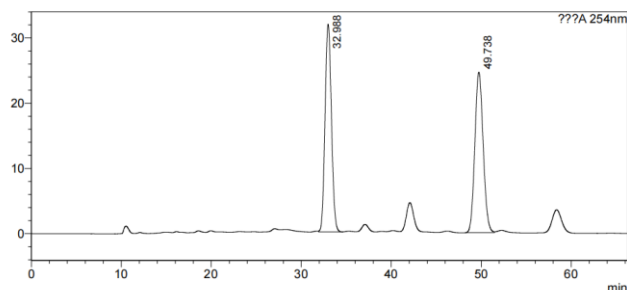

<Peak Table>

| Peak# | Ret. Time | Area    | Height | Conc.  | Unit | Mark | Name |
|-------|-----------|---------|--------|--------|------|------|------|
| 1     | 32.988    | 1571347 | 31831  | 49.857 |      |      |      |
| 2     | 49.738    | 1580368 | 24587  | 50.143 |      |      |      |
| Total |           | 3151715 | 56418  |        |      |      |      |

<Chromatogram>  
mAU

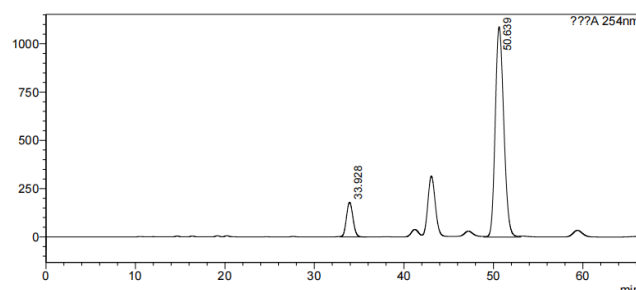

<Peak Table>

| Peak# | Ret. Time | Area     | Height  | Conc.  | Unit | Mark | Name |
|-------|-----------|----------|---------|--------|------|------|------|
| 1     | 33.928    | 9113956  | 179681  | 11.197 |      | M    |      |
| 2     | 50.639    | 72279076 | 1089103 | 88.803 |      | M    |      |
| Total |           | 81393033 | 1268784 |        |      |      |      |

<Chromatogram>  
mAU

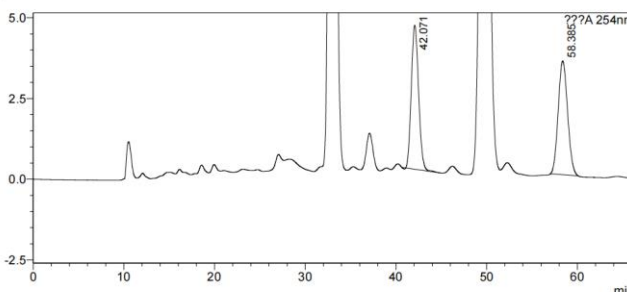

<Peak Table>

| Peak# | Ret. Time | Area   | Height | Conc.  | Unit | Mark | Name |
|-------|-----------|--------|--------|--------|------|------|------|
| 1     | 42.071    | 249487 | 4456   | 49.520 |      | M    |      |
| 2     | 58.385    | 254321 | 3527   | 50.480 |      | M    |      |
| Total |           | 503809 | 7984   |        |      |      |      |

<Chromatogram>  
mAU

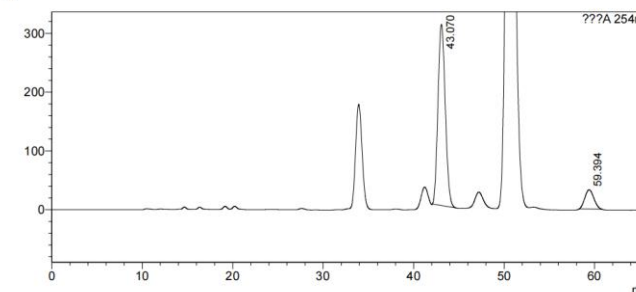

<Peak Table>

| Peak# | Ret. Time | Area     | Height | Conc.  | Unit | Mark | Name |
|-------|-----------|----------|--------|--------|------|------|------|
| 1     | 43.070    | 17324866 | 308091 | 88.430 |      | M    |      |
| 2     | 59.394    | 2266823  | 32755  | 11.570 |      | M    |      |
| Total |           | 19591689 | 340846 |        |      |      |      |

**(S)-5-methyl-2-phenyl-5-((R,E)-3-phenylnon-3-en-1-yn-5-yl)thiazol-4(5H)-one: 3v**

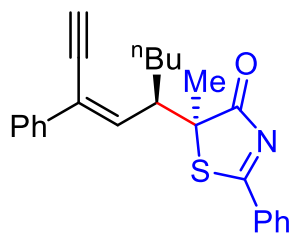

Yellow liquid. 29 mg, 75% yield, 7:1 dr, 78.5:21.5 er.

$^1\text{H}$  NMR (600 MHz,  $\text{CDCl}_3$ ):  $\delta$  8.18 (d,  $J = 7.8$  Hz, 2.00H, major), 8.15 (d,  $J = 7.8$  Hz, 0.28H, minor), 7.70-7.67 (m, 1.14H), 7.65 (d,  $J = 7.8$  Hz, 2.00H, major), 7.59 (d,  $J = 7.8$  Hz, 0.28H, minor), 7.55-7.53 (m, 2.28H), 7.41-7.38 (m, 2.28H), 7.35-7.31 (m, 1.14H), 6.52 (d,  $J = 10.2$  Hz, 0.14H, minor), 6.13 (d,  $J = 10.2$  Hz, 1.00H, major), 3.62-3.58 (m, 1.00H), 3.47-3.43 (m, 0.14H), 3.41 (s, 1.00H, major), 3.37 (s, 0.14H, minor), 1.80 (s, 0.42H, minor), 1.73 (s, 3.00H, major), 1.70-1.61 (m, 0.56H), 1.45-1.35 (m, 2.28H), 1.31-1.22 (m, 4.00H), 0.85 (t,  $J = 6.6$  Hz, 0.42H, minor), 0.81 (t,  $J = 6.6$  Hz, 3.00H, major).  $^{13}\text{C}$  NMR (151 MHz,  $\text{CDCl}_3$ ):  $\delta$  195.6, 195.3, 194.8, 194.6, 138.4, 137.7, 137.2, 137.0, 135.1, 135.0, 132.3, 132.2, 129.04, 129.02, 128.9, 128.8, 128.5, 128.3, 128.1, 127.9, 127.6, 127.3, 126.3, 126.2, 84.2, 83.7, 80.9, 80.5, 69.5, 68.2, 49.3, 48.6, 30.5, 30.3, 29.4, 29.2, 25.7, 24.8, 22.6, 22.5, 13.9. HRMS (ESI) calcd for  $\text{C}_{25}\text{H}_{26}\text{NOS}$  [(M+H $^+$ )]: 388.1730, found: 388.1725. HPLC analysis of the product: Daicel Chiralpak ADH column; hexane/2-propanol = 97/3, 0.3 mL/min. Retention times: 38.25 min (major), 43.99 min (minor).

<Chromatogram>  
mAU

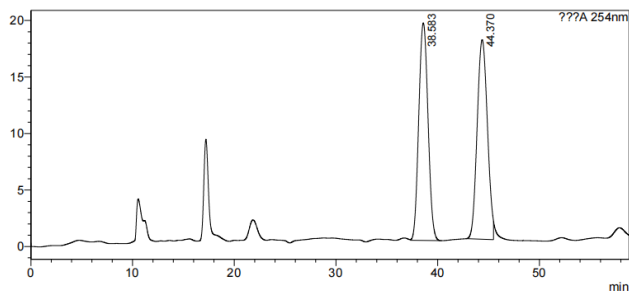

<Peak Table>

| Peak# | Ret. Time | Area    | Height | Conc.  | Unit | Mark | Name |
|-------|-----------|---------|--------|--------|------|------|------|
| 1     | 38.583    | 1215148 | 19248  | 49.536 |      |      |      |
| 2     | 44.370    | 1237928 | 17654  | 50.464 |      | M    |      |
| Total |           | 2453076 | 36903  |        |      |      |      |

<Chromatogram>  
mAU

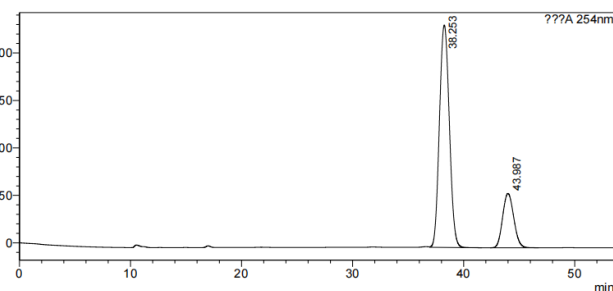

<Peak Table>

| Peak# | Ret. Time | Area     | Height | Conc.  | Unit | Mark | Name |
|-------|-----------|----------|--------|--------|------|------|------|
| 1     | 38.253    | 14513517 | 234340 | 78.524 |      |      |      |
| 2     | 43.987    | 3969403  | 57208  | 21.476 |      |      |      |
| Total |           | 18482920 | 291548 |        |      |      |      |

**(S)-5-((R,E)-1-cyclohexyl-4-phenylhex-3-en-5-yn-2-yl)-5-methyl-2-phenylthiazol-4(5H)-one: 3w**

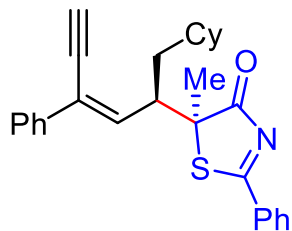

Yellow liquid. 27 mg, 75% yield, 11:1 dr, 83.5:16.5 er.

$^1\text{H}$  NMR (600 MHz,  $\text{CDCl}_3$ ):  $\delta$  8.17 (d,  $J = 7.2$  Hz, 2H), 7.70-7.65 (m, 3H), 7.55-7.53 (m, 2H), 7.41-7.39 (m, 2H), 7.36-7.32 (m, 1H), 6.13 (d,  $J = 10.2$  Hz, 1H), 3.74-3.70 (m, 1H), 3.41 (s, 1H), 1.99-1.97 (m, 1H), 1.74 (s, 3H), 1.67-1.65 (m, 1H), 1.59-1.57 (m, 2H), 1.48-1.46 (m, 1H), 1.39-1.35 (m, 1H), 1.20-1.06 (m, 5H), 0.88-0.81 (m, 2H).  $^{13}\text{C}$  NMR (151 MHz,  $\text{CDCl}_3$ ):  $\delta$  195.5, 195.2, 138.7, 137.0, 135.1, 132.3, 129.0, 128.9, 128.5, 128.3, 127.3, 126.2, 84.1, 80.5, 69.7, 46.7, 38.4, 35.2, 34.5, 32.4, 26.4, 26.2, 26.0, 25.8. HRMS (ESI) calcd for  $\text{C}_{28}\text{H}_{30}\text{NOS}$  [(M+H $^+$ )]: 428.2043, found: 428.2039. HPLC analysis of the product: Daicel Chiralpak IC-3 column; hexane/2-propanol = 95/5, 0.5 mL/min. Retention times: 13.88 min (major), 18.17 min (minor).

<Chromatogram>  
mAU

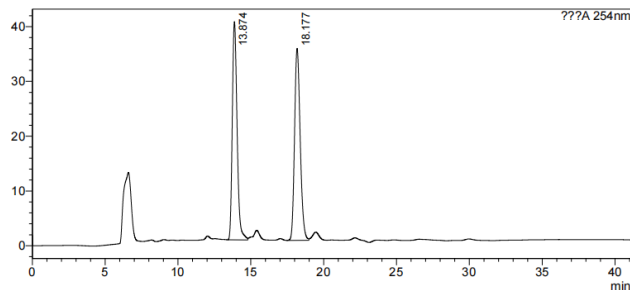

<Peak Table>

| Peak# | Ret. Time | Area    | Height | Conc.  | Unit | Mark | Name |
|-------|-----------|---------|--------|--------|------|------|------|
| 1     | 13.874    | 910352  | 39813  | 49.071 |      | M    |      |
| 2     | 18.177    | 944809  | 35015  | 50.929 |      |      |      |
| Total |           | 1855160 | 74829  |        |      |      |      |

<Chromatogram>  
mAU

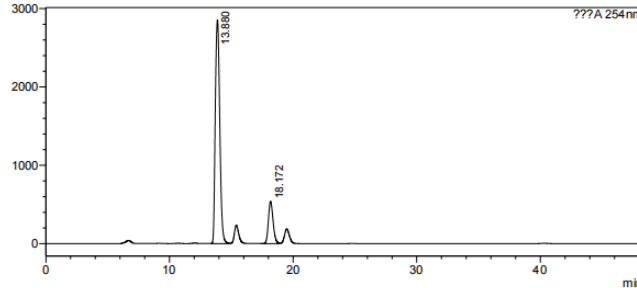

<Peak Table>

| Peak# | Ret. Time | Area     | Height  | Conc.  | Unit | Mark | Name |
|-------|-----------|----------|---------|--------|------|------|------|
| 1     | 13.880    | 71837879 | 2852902 | 83.504 |      |      |      |
| 2     | 18.172    | 14191585 | 537813  | 16.496 |      |      |      |
| Total |           | 86029465 | 3390715 |        |      |      |      |

**(R)-5-((R)-1-(2-ethynylcyclohex-1-en-1-yl)propyl)-2,5-diphenylthiazol-4(5H)-one: 4a**

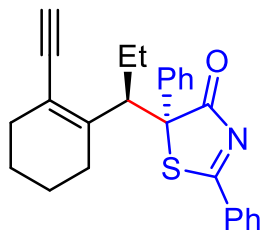

Colorless liquid. 24 mg, 60% yield, 16:1 dr, 93:7 er.

$^1\text{H}$  NMR (600 MHz,  $\text{CDCl}_3$ ):  $\delta$  8.21 (d,  $J = 7.8$  Hz, 2H), 7.74 (d,  $J = 7.8$  Hz, 2H), 7.69-7.66 (m, 1H), 7.54-7.52 (m, 2H), 7.30-7.23 (m, 3H), 4.45 (d,  $J = 10.2$  Hz, 1H), 3.18 (s, 1H), 2.13-2.04 (m, 2H), 1.92-1.89 (m, 1H), 1.75-1.72 (m, 2H), 1.50-1.45 (m, 3H), 1.35-1.31 (m, 1H), 1.23-1.18 (m, 1H), 0.86 (t,  $J = 7.8$  Hz, 3H).  $^{13}\text{C}$  NMR (151 MHz,  $\text{CDCl}_3$ ):  $\delta$  194.5, 193.5, 142.1, 137.2, 135.0, 132.1, 129.0, 128.8, 128.1, 128.0, 127.5, 120.7, 84.3, 80.8, 75.6, 55.5, 30.3, 25.1, 22.7, 22.3, 22.0, 11.8. HRMS (ESI) calcd for  $\text{C}_{26}\text{H}_{26}\text{NOS}$  [(M+H $^+$ )]: 400.1730, found: 400.1727. HPLC analysis of the product: Daicel Chiralpak IA-3 column; hexane/2-propanol = 90/10, 0.8 mL/min. Retention times: 35.43 min (major), 39.95 min (minor).

<Chromatogram>  
mAU

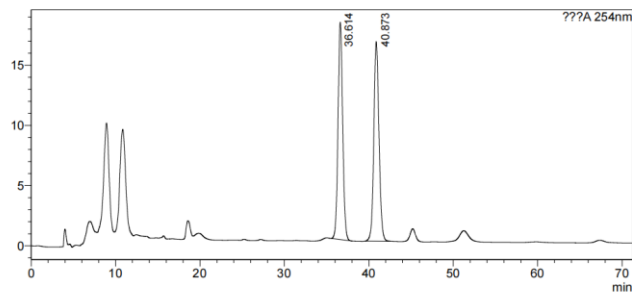

<Peak Table>

| Peak# | Ret. Time | Area    | Height | Conc.  | Unit | Mark | Name |
|-------|-----------|---------|--------|--------|------|------|------|
| 1     | 36.614    | 694026  | 18050  | 49.620 |      |      |      |
| 2     | 40.873    | 704667  | 16567  | 50.380 |      |      |      |
| Total |           | 1398694 | 34617  |        |      |      |      |

<Chromatogram>  
mAU

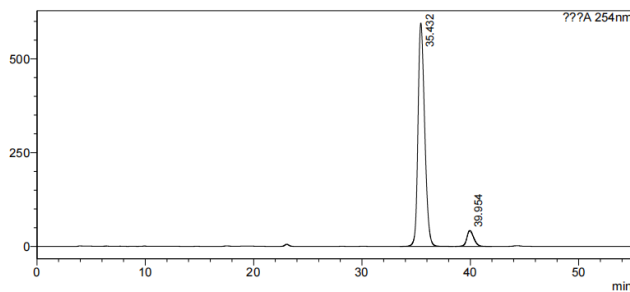

<Peak Table>

| Peak# | Ret. Time | Area     | Height | Conc.  | Unit | Mark | Name |
|-------|-----------|----------|--------|--------|------|------|------|
| 1     | 35.432    | 25536675 | 595134 | 93.106 |      | M    |      |
| 2     | 39.954    | 1890861  | 42199  | 6.894  |      | M    |      |
| Total |           | 27427536 | 637332 |        |      |      |      |

**(R)-5-((R)-(2-ethynylcyclohex-1-en-1-yl)(phenyl)methyl)-2,5-diphenylthiazol-4(5H)-one: 4b**

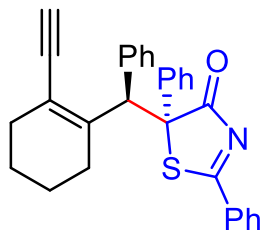

White solid. 34 mg, 76% yield, 4.4:1 dr, 94:6 er,

$^1\text{H}$  NMR (600 MHz,  $\text{CDCl}_3$ ):  $\delta$  8.18 (d,  $J = 7.2$  Hz, 0.46H, minor), 8.06 (d,  $J = 7.8$  Hz, 2.00H, major), 7.93-7.91 (m, 0.23H), 7.82 (d,  $J = 7.2$  Hz, 0.23H, minor), 7.79 (d,  $J = 7.8$  Hz, 2.00H, major), 7.68-7.66 (m, 0.23H), 7.64-7.61 (m, 1.00H), 7.54-7.51 (m, 0.46H), 7.48-7.45 (m, 2.00H), 7.42-7.40 (m, 0.46H), 7.37-7.33 (m, 4.00H), 7.30-7.28 (m, 0.92H), 7.24-7.22 (m, 0.46H), 7.19-7.15 (m, 3.00H), 7.12-7.10 (m, 1.00H), 5.95 (s, 1.00H, major), 5.87 (s, 0.23H, minor), 3.29 (s, 0.23H, minor), 3.25 (s, 1.00H, major), 2.47-2.44 (m, 1.00H), 2.29-2.26 (m, 0.60H), 2.22-2.13 (m, 0.84H), 2.11-2.05 (m, 2.00H), 1.95-1.92 (m, 1.00H), 1.58-1.47 (m, 3.00H), 1.41-1.36 (m, 1.40H).  $^{13}\text{C}$  NMR (151 MHz,  $\text{CDCl}_3$ ):  $\delta$  194.4, 193.3, 193.0, 191.4, 144.4, 143.4, 139.1, 138.5, 138.3, 137.2, 135.0, 134.9, 132.1, 131.9, 129.6, 129.04, 129.02, 128.9, 128.8, 128.7, 128.43, 128.39, 128.2, 128.14, 128.05, 127.9, 127.7, 127.5, 127.2, 126.9, 120.7, 120.5, 84.1, 83.4, 82.4, 81.6, 75.0, 74.9, 58.1, 57.5, 30.6, 30.2, 29.7, 28.4, 22.6, 22.4, 21.8, 21.7. HRMS (ESI) calcd for  $\text{C}_{30}\text{H}_{26}\text{NOS}$  [(M+H $^+$ )]: 448.1730, found: 448.1726. HPLC analysis of the product: Daicel Chiralpak IC-3 column; hexane/2-propanol = 90/10, 0.8 mL/min. Retention times: 46.17 min (minor), 51.33 min (major).

<Chromatogram>  
mAU

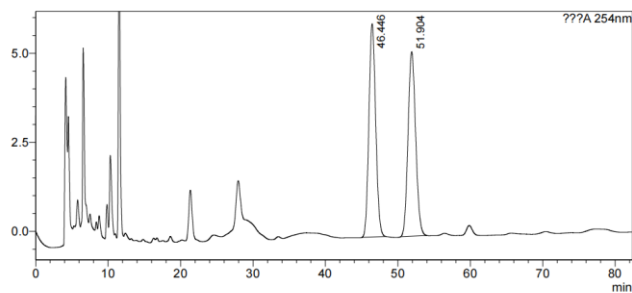

<Peak Table>

| Peak# | Ret. Time | Area   | Height | Conc.  | Unit | Mark | Name |
|-------|-----------|--------|--------|--------|------|------|------|
| 1     | 46.446    | 389406 | 5983   | 50.670 |      |      |      |
| 2     | 51.904    | 379111 | 5173   | 49.330 |      |      |      |
| Total |           | 768517 | 11156  |        |      |      |      |

<Chromatogram>  
mAU

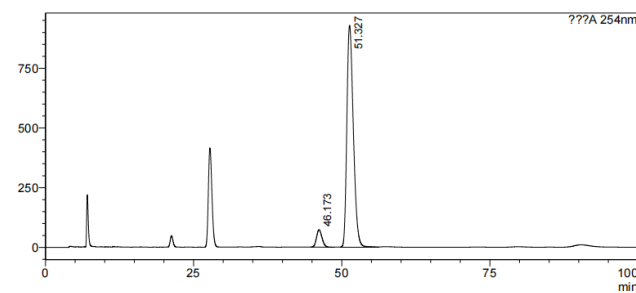

<Peak Table>

| Peak# | Ret. Time | Area     | Height  | Conc.  | Unit | Mark | Name |
|-------|-----------|----------|---------|--------|------|------|------|
| 1     | 46.173    | 4685350  | 72916   | 6.217  |      |      |      |
| 2     | 51.327    | 70679620 | 928104  | 93.783 |      | M    |      |
| Total |           | 75364970 | 1001019 |        |      |      |      |

**(S)-5-ethyl-5-((R)-(2-ethynylcyclohex-1-en-1-yl)(phenyl)methyl)-2-phenylthiazol-4(5H)-one: 4c**

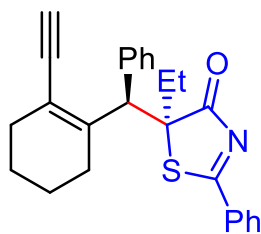

Light yellow solid. 29 mg, 73% yield, 4.5:1 dr, 94.5:5.5 er, 90:10 er.

$^1\text{H}$  NMR (600 MHz,  $\text{CDCl}_3$ ):  $\delta$  8.15 (d,  $J = 7.8$  Hz, 0.44H, minor), 8.09 (d,  $J = 7.8$  Hz, 2.00H, major), 7.68-7.63 (m, 1.22H), 7.53-7.52 (m, 0.44H), 7.50-7.45 (m, 2.44H), 7.36-7.35 (m, 2.00H), 7.33-7.30 (m, 0.44H), 7.25-7.21 (m, 0.22H), 7.15-7.10 (m, 3.00H), 5.31 (s, 1.00H, major), 5.25 (s, 0.22H, minor), 3.29 (s, 0.22H, minor), 3.28 (s, 1.00H, major), 2.42-2.39 (m, 1.00H), 2.34-2.31 (m, 1.00H), 2.27-2.25 (m, 2.00H), 2.19-2.10 (m, 0.88H), 2.00-1.92 (m, 1.22H), 1.73-1.70 (m, 1.22H), 1.66-1.62 (m, 4.00H), 1.57-1.45 (m, 0.88H), 0.86 (t,  $J = 7.2$  Hz, 3.00H, major), 0.82 (t,  $J = 7.2$  Hz, 0.66H, minor).  $^{13}\text{C}$  NMR (151 MHz,  $\text{CDCl}_3$ ):  $\delta$  195.2, 194.9, 194.6, 193.9, 144.4, 143.0, 139.2, 138.2, 134.81, 134.77, 132.3, 132.2, 129.1, 129.03, 128.99, 128.9, 128.8, 128.7, 128.5, 128.1, 127.3, 127.2, 120.3, 119.0, 84.3, 83.6, 81.7, 81.3, 73.4, 72.6, 58.4, 58.0, 32.5, 32.0, 30.7, 30.6, 26.9, 26.5, 22.6, 22.5, 22.0, 21.8, 8.5, 8.4. HRMS (ESI) calcd for  $\text{C}_{26}\text{H}_{26}\text{NOS}$  [(M+H $^+$ )]: 400.1730, found: 400.1727. HPLC analysis of the product: Daicel Chiralpak ADH column; hexane/2-propanol = 90/10, 0.5 mL/min. Retention times: for major product: 24.13 min (major), 61.59 min (minor); for minor product: 16.81 min (minor), 38.35 min (major).

<Chromatogram>  
mV

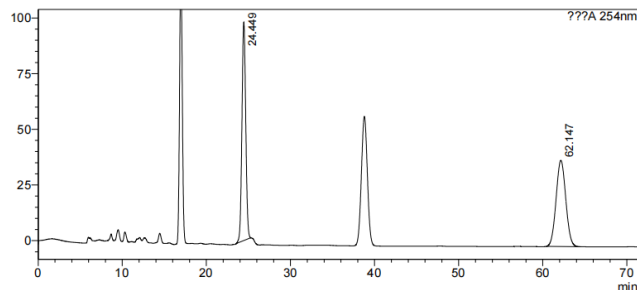

<Peak Table>

| Peak# | Ret. Time | Area    | Height | Conc.  | Unit | Mark | Name |
|-------|-----------|---------|--------|--------|------|------|------|
| 1     | 24.449    | 3084521 | 98141  | 49.946 |      | M    |      |
| 2     | 62.147    | 3091233 | 38700  | 50.054 |      | M    |      |
| Total |           | 6175754 | 136841 |        |      |      |      |

<Chromatogram>  
mV

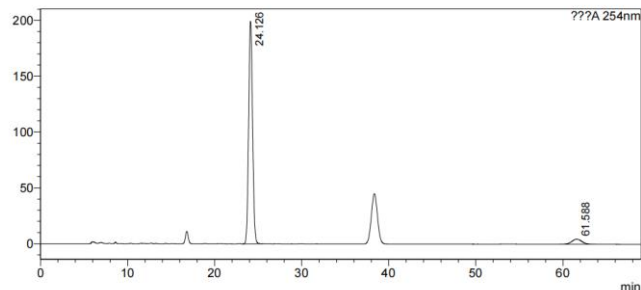

<Peak Table>

| Peak# | Ret. Time | Area    | Height | Conc.  | Unit | Mark | Name |
|-------|-----------|---------|--------|--------|------|------|------|
| 1     | 24.126    | 6246668 | 199223 | 94.502 |      | M    |      |
| 2     | 61.588    | 363402  | 4569   | 5.498  |      | M    |      |
| Total |           | 6610070 | 203792 |        |      |      |      |

<Chromatogram>  
mV

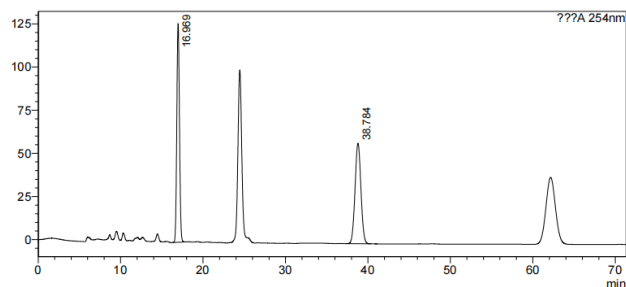

<Peak Table>

| Peak# | Ret. Time | Area    | Height | Conc.  | Unit | Mark | Name |
|-------|-----------|---------|--------|--------|------|------|------|
| 1     | 16.969    | 2857487 | 126633 | 49.750 |      | M    |      |
| 2     | 38.784    | 2886260 | 58195  | 50.250 |      | M    |      |
| Total |           | 5743747 | 184828 |        |      |      |      |

<Chromatogram>  
mV

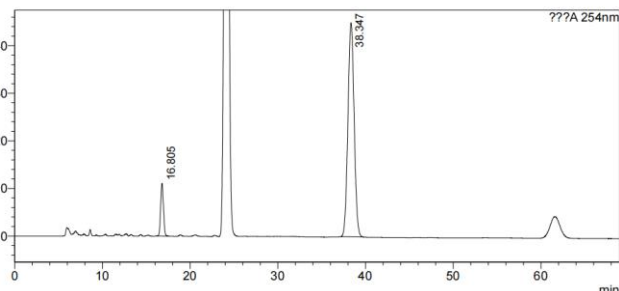

<Peak Table>

| Peak# | Ret. Time | Area    | Height | Conc.  | Unit | Mark | Name |
|-------|-----------|---------|--------|--------|------|------|------|
| 1     | 16.805    | 248205  | 11089  | 10.102 |      | M    |      |
| 2     | 38.347    | 2208753 | 44981  | 89.898 |      | M    |      |
| Total |           | 2456957 | 56070  |        |      |      |      |



**(S)-5-ethyl-5-((R)-1-(2-ethynylcyclohex-1-en-1-yl)propyl)-2-phenylthiazol-4(5H)-one: 4d**

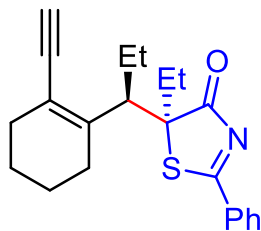

Yellow solid. 23 mg, 66% yield, 11:1 dr, 81:19 er.

$^1\text{H}$  NMR (600 MHz,  $\text{CDCl}_3$ ):  $\delta$  8.19 (d,  $J = 7.8$  Hz, 2H), 7.68-7.66 (m, 1H), 7.54-7.51 (m, 2H), 3.88 (dd,  $J = 11.4$  and 3.6 Hz, 1H), 3.21 (s, 1H), 2.33-2.26 (m, 2H), 2.18-2.12 (m, 1H), 2.10-2.07 (m, 1H), 1.90-1.87 (m, 1H), 1.77-1.66 (m, 3H), 1.58-1.54 (m, 3H), 1.19-1.12 (m, 1H), 0.81-0.75 (m, 6H).  $^{13}\text{C}$  NMR (151 MHz,  $\text{CDCl}_3$ ):  $\delta$  196.2, 196.1, 142.4, 134.9, 132.3, 129.0, 128.8, 120.7, 83.9, 81.1, 73.7, 54.3, 30.8, 30.5, 24.8, 22.4, 22.3, 21.6, 11.2, 8.5. HRMS (ESI) calcd for  $\text{C}_{22}\text{H}_{26}\text{NOS}$  [(M+H) $^+$ ]: 352.1370, found: 352.1368. HPLC analysis of the product: Daicel Chiralpak IC-3 column; hexane/2-propanol = 96/4, 0.3 mL/min. Retention times: 62.58 min (major), 81.16 min (minor).

<Chromatogram>  
mAU

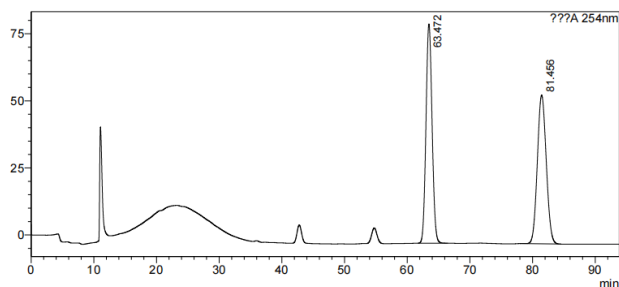

<Peak Table>

| Peak# | Ret. Time | Area     | Height | Conc.  | Unit | Mark | Name |
|-------|-----------|----------|--------|--------|------|------|------|
| 1     | 63.472    | 5509413  | 81707  | 50.149 |      |      |      |
| 2     | 81.456    | 5476641  | 55469  | 49.851 |      | M    |      |
| Total |           | 10986054 | 137176 |        |      |      |      |

<Chromatogram>  
mAU

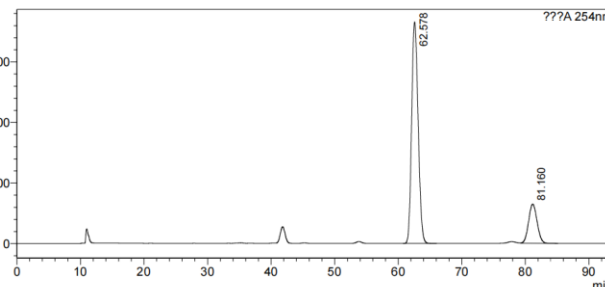

<Peak Table>

| Peak# | Ret. Time | Area     | Height | Conc.  | Unit | Mark | Name |
|-------|-----------|----------|--------|--------|------|------|------|
| 1     | 62.578    | 25936872 | 365823 | 81.046 |      |      |      |
| 2     | 81.160    | 6065832  | 64808  | 18.954 |      |      |      |
| Total |           | 32002704 | 430630 |        |      |      |      |

**(S)-5-((R)-(2-ethynylcyclohex-1-en-1-yl)(phenyl)methyl)-2-(4-methoxyphenyl)-5-methylthiazol-4(5H)-one: 4e**

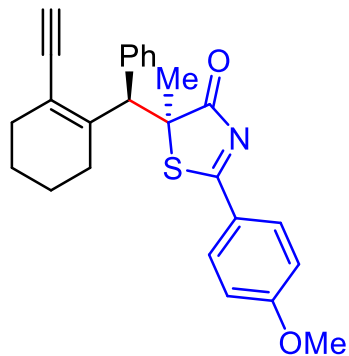

White solid. 36 mg, 87% yield, 4.4:1 dr, 98:2 er, 88:12 er.

<sup>1</sup>H NMR (600 MHz, CDCl<sub>3</sub>): δ 8.10 (d, *J* = 9.0 Hz, 0.46H, minor), 8.07 (d, *J* = 8.4 Hz, 2.00H, major), 7.46-7.45 (m, 0.46H), 7.33-7.31 (m, 0.46H), 7.29-7.26 (m, 2.00H), 7.15-7.09 (m, 3.14H), 6.99-6.95 (m, 2.55H), 5.30 (s, 1.00H, major), 5.18 (s, 0.23H, minor), 3.89 (s, 0.69H, minor), 3.88 (s, 3.00H, major), 3.28 (s, 0.23H, minor), 3.26 (s, 1.00H, major), 2.36-2.22 (m, 4.85H), 2.16-2.09 (m, 0.50H), 1.73 (s, 3.00H, major), 1.70 (s, 0.69H, minor), 1.68-1.57 (m, 4.00H), 1.47-1.42 (m, 0.49H). <sup>13</sup>C NMR (151 MHz, CDCl<sub>3</sub>): δ 195.3, 194.5, 193.0, 192.4, 165.2, 164.0, 144.5, 143.0, 139.2, 138.4, 131.1, 129.8, 129.0, 128.4, 128.2, 128.0, 127.2, 127.0, 124.9, 124.8, 120.5, 118.9, 114.35, 114.29, 84.2, 83.6, 81.6, 81.3, 67.3, 66.2, 57.7, 56.7, 55.7, 30.6, 30.5, 28.1, 27.6, 26.8, 26.0, 22.5, 22.4, 22.1, 21.8. HRMS (ESI) calcd for C<sub>26</sub>H<sub>26</sub>NO<sub>2</sub>S [(M+H<sup>+</sup>): 416.1679, found: 416.1675. HPLC analysis of the product: Daicel Chiralpak IA-3 column; hexane/2-propanol = 90/10, 0.5 mL/min. Retention times: for major product: 37.60 min (major), 51.67 min (minor); for minor product: 32.86 min (minor), 35.42 min (major).

CDCl<sub>3</sub>): δ 195.3, 194.5, 193.0, 192.4, 165.2, 164.0, 144.5, 143.0, 139.2, 138.4, 131.1, 129.8, 129.0, 128.4, 128.2, 128.0, 127.2, 127.0, 124.9, 124.8, 120.5, 118.9, 114.35, 114.29, 84.2, 83.6, 81.6, 81.3, 67.3, 66.2, 57.7, 56.7, 55.7, 30.6, 30.5, 28.1, 27.6, 26.8, 26.0, 22.5, 22.4, 22.1, 21.8. HRMS (ESI) calcd for C<sub>26</sub>H<sub>26</sub>NO<sub>2</sub>S [(M+H<sup>+</sup>): 416.1679, found: 416.1675. HPLC analysis of the product: Daicel Chiralpak IA-3 column; hexane/2-propanol = 90/10, 0.5 mL/min. Retention times: for major product: 37.60 min (major), 51.67 min (minor); for minor product: 32.86 min (minor), 35.42 min (major).

<Chromatogram>

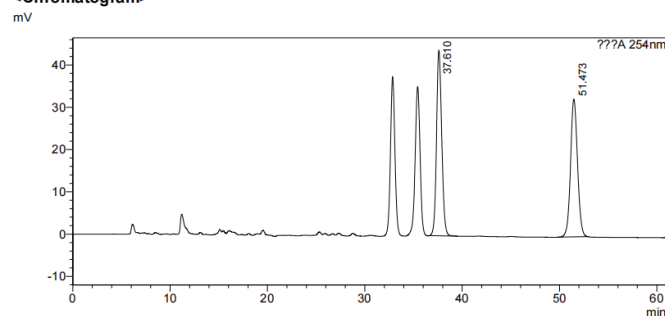

<Peak Table>

| Peak# | Ret. Time | Area    | Height | Conc.  | Unit | Mark | Name |
|-------|-----------|---------|--------|--------|------|------|------|
| 1     | 37.610    | 1632772 | 43893  | 50.168 |      | M    |      |
| 2     | 51.473    | 1621814 | 32596  | 49.832 |      | M    |      |
| Total |           | 3254586 | 76488  |        |      |      |      |

<Chromatogram>

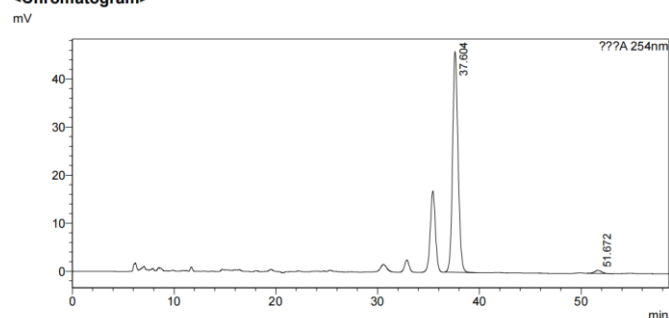

<Peak Table>

| Peak# | Ret. Time | Area    | Height | Conc.  | Unit | Mark | Name |
|-------|-----------|---------|--------|--------|------|------|------|
| 1     | 37.604    | 1724818 | 45942  | 98.334 |      | M    |      |
| 2     | 51.672    | 29230   | 622    | 1.666  |      | M    |      |
| Total |           | 1754048 | 46565  |        |      |      |      |

<Chromatogram>

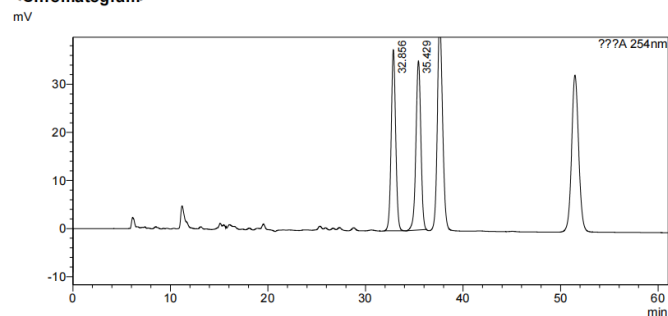

<Peak Table>

| Peak# | Ret. Time | Area    | Height | Conc.  | Unit | Mark | Name |
|-------|-----------|---------|--------|--------|------|------|------|
| 1     | 32.856    | 1209879 | 37966  | 49.583 |      | M    |      |
| 2     | 35.429    | 1230219 | 35159  | 50.417 |      | M    |      |
| Total |           | 2440097 | 72825  |        |      |      |      |

<Chromatogram>

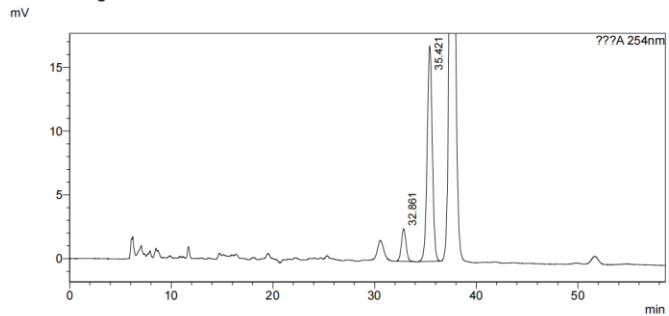

<Peak Table>

| Peak# | Ret. Time | Area   | Height | Conc.  | Unit | Mark | Name |
|-------|-----------|--------|--------|--------|------|------|------|
| 1     | 32.861    | 81676  | 2563   | 12.119 |      | M    |      |
| 2     | 35.421    | 592265 | 16896  | 87.881 |      | M    |      |
| Total |           | 673941 | 19459  |        |      |      |      |

**(S)-2-(4-chlorophenyl)-5-((R)-(2-ethynylcyclohex-1-en-1-yl)(phenyl)methyl)-5-methylthiazol-4(5H)-one: 4f**

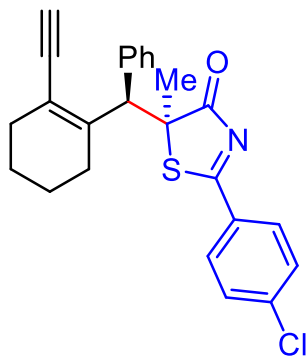

Yellow liquid. 30 mg, 72% yield, 3.4:1 dr, 98:2 er, 87.5:12.5 er.

<sup>1</sup>H NMR (600 MHz, CDCl<sub>3</sub>): δ 8.06 (d, *J* = 8.4 Hz, 0.58H, minor), 8.02 (d, *J* = 9.0 Hz, 2.00H, major), 7.49 (d, *J* = 8.4 Hz, 0.58H, minor), 7.47 (d, *J* = 8.4 Hz, 2.00H, major), 7.44-7.43 (m, 0.70H), 7.34-7.31 (m, 0.65H), 7.27-7.26 (m, 2.30H), 7.16-7.11 (m, 2.80H), 5.30 (s, 1.00H, major), 5.19 (s, 0.29H, minor), 3.29 (s, 0.29H, minor), 3.28 (s, 1.00H, major), 2.37-2.22 (m, 5.32H), 2.15-2.09 (m, 0.70H), 1.74 (s, 3.00H, major), 1.72 (s, 0.87H, minor), 1.69-1.62 (m, 4.30H).

<sup>13</sup>C NMR (151 MHz, CDCl<sub>3</sub>): δ 195.2, 194.4, 193.0, 192.4, 144.2, 142.6, 141.41, 141.39, 138.9, 138.2, 130.7, 130.6, 129.9, 129.4, 129.3, 129.0, 128.5, 128.4, 128.2, 128.1, 127.4, 127.2, 120.8, 119.3, 84.1, 83.5, 81.8, 81.5, 67.9, 66.9, 57.8, 57.0, 30.6, 30.5, 27.9, 27.3, 26.9, 26.1, 22.5, 22.4, 22.0, 21.8. HRMS (ESI) calcd for C<sub>25</sub>H<sub>23</sub>ClNOS [(M+H<sup>+</sup>): 420.1183, found: 420.1180. HPLC analysis of the product: Daicel Chiralpak ASH column; hexane/2-propanol = 90/10, 0.5 mL/min. Retention times: for major product: 13.15 min (minor), 18.20 min (major); for minor product: 10.16 min (major), 14.44 min (minor).

<Chromatogram>

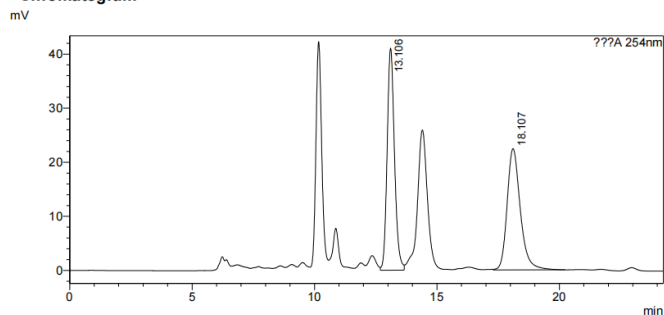

<Peak Table>

| Peak# | Ret. Time | Area    | Height | Conc.  | Unit | Mark | Name |
|-------|-----------|---------|--------|--------|------|------|------|
| 1     | 13.106    | 854967  | 41027  | 50.486 |      |      |      |
| 2     | 18.107    | 838497  | 22423  | 49.514 |      |      |      |
| Total |           | 1693463 | 63450  |        |      |      |      |

<Chromatogram>

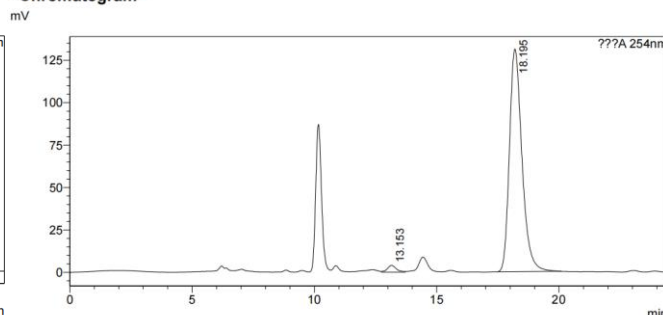

<Peak Table>

| Peak# | Ret. Time | Area    | Height | Conc.  | Unit | Mark | Name |
|-------|-----------|---------|--------|--------|------|------|------|
| 1     | 13.153    | 102600  | 4017   | 2.147  |      |      |      |
| 2     | 18.195    | 4676363 | 131230 | 97.853 |      | M    |      |
| Total |           | 4778963 | 135247 |        |      |      |      |

<Chromatogram>

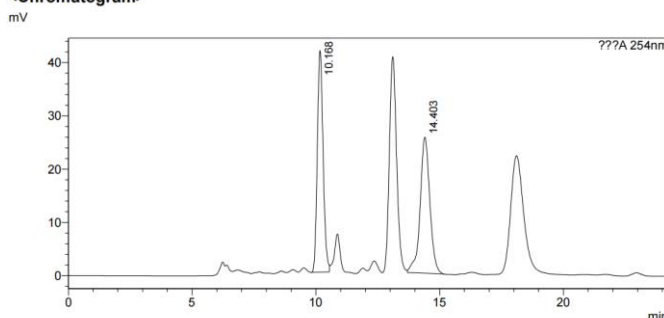

<Peak Table>

| Peak# | Ret. Time | Area    | Height | Conc.  | Unit | Mark | Name |
|-------|-----------|---------|--------|--------|------|------|------|
| 1     | 10.168    | 677496  | 41574  | 49.246 |      | M    |      |
| 2     | 14.403    | 698233  | 25529  | 50.754 |      | M    |      |
| Total |           | 1375729 | 67103  |        |      |      |      |

<Chromatogram>

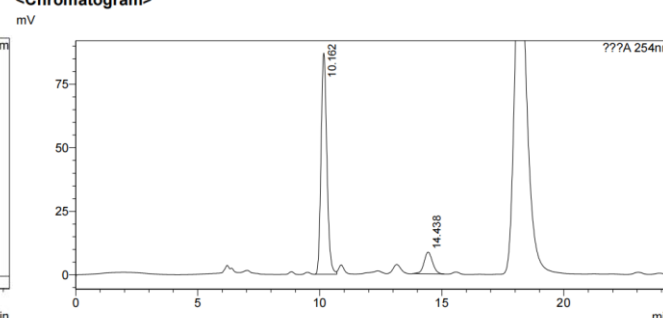

<Peak Table>

| Peak# | Ret. Time | Area    | Height | Conc.  | Unit | Mark | Name |
|-------|-----------|---------|--------|--------|------|------|------|
| 1     | 10.162    | 1445052 | 86935  | 87.490 |      | M    |      |
| 2     | 14.438    | 206624  | 8526   | 12.510 |      | M    |      |
| Total |           | 1651676 | 95461  |        |      |      |      |

**(S)-5-((R)-(2-ethynylcyclohex-1-en-1-yl)(phenyl)methyl)-5-methyl-2-(o-tolyl)thiazol-4(5H)-one: 4g**

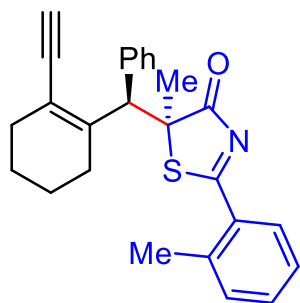

Colorless liquid. 39 mg, 98% yield, 3:1 dr, 98:2 er.

$^1\text{H}$  NMR (600 MHz,  $\text{CDCl}_3$ ):  $\delta$  7.77 (d,  $J = 7.8$  Hz, 0.33H, minor), 7.73 (d,  $J = 7.8$  Hz, 1.00H, major), 7.47-7.42 (m, 2.00H), 7.33-7.31 (m, 3.00H), 7.30-7.27 (m, 2.64H), 7.19-7.15 (m, 3.00H), 5.27 (s, 1.00H, major), 5.20 (s, 0.33H, minor), 3.29 (s, 0.33H, minor), 3.28 (s, 1.00H, major), 2.61 (s, 0.99H, minor), 2.39 (s, 3.00H, major), 2.37-2.37 (m, 4.00H), 2.25-2.24 (m, 0.66H), 2.17-2.13 (m, 0.66H), 1.744 (s, 3.00H, major), 1.739 (s, 0.99H, minor), 1.67-1.60 (m, 4.00H), 1.57-1.43 (m, 1.32H).  $^{13}\text{C}$  NMR (151 MHz,  $\text{CDCl}_3$ ):  $\delta$  196.1, 195.8, 195.3, 194.9, 144.4, 142.7, 138.95, 138.91, 138.7, 138.3, 132.9, 132.7, 132.3, 132.2, 132.1, 131.9, 130.0, 129.3, 129.1, 128.7, 128.4, 128.1, 127.3, 127.2, 126.1, 126.0, 120.7, 119.1, 84.2, 83.5, 81.9, 81.5, 67.0, 66.3, 58.0, 57.5, 30.7, 30.6, 27.5, 27.1, 26.6, 26.3, 22.6, 22.5, 22.03, 21.91, 21.87, 21.5. HRMS (ESI) calcd for  $\text{C}_{26}\text{H}_{26}\text{NOS}$  [(M+H $^+$ ): 400.1730, found: 400.1726. HPLC analysis of the product: Daicel Chiralpak IC-3 column; hexane/2-propanol = 90/10, 0.3 mL/min. Retention times: 76.54 min (minor), 54.04 min (major).

<Chromatogram>  
mAU

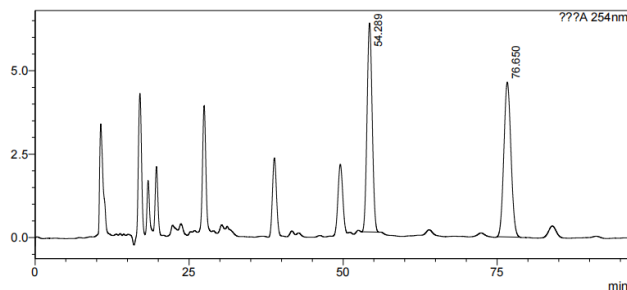

<Peak Table>

| Peak# | Ret. Time | Area   | Height | Conc.  | Unit | Mark | Name |
|-------|-----------|--------|--------|--------|------|------|------|
| 1     | 54.289    | 363827 | 6262   | 49.523 |      |      |      |
| 2     | 76.650    | 370830 | 4637   | 50.477 |      |      |      |
| Total |           | 734657 | 10900  |        |      |      |      |

<Chromatogram>  
mAU

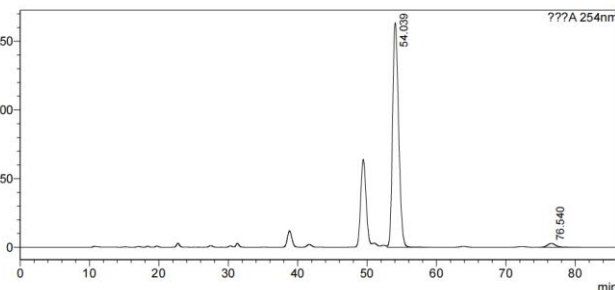

<Peak Table>

| Peak# | Ret. Time | Area     | Height | Conc.  | Unit | Mark | Name |
|-------|-----------|----------|--------|--------|------|------|------|
| 1     | 54.039    | 49380798 | 817437 | 97.763 |      |      |      |
| 2     | 76.540    | 1129693  | 13693  | 2.237  |      |      |      |
| Total |           | 50510491 | 831131 |        |      |      |      |

## 5. General Procedure IV: General Procedure for

### Gram-scale reaction

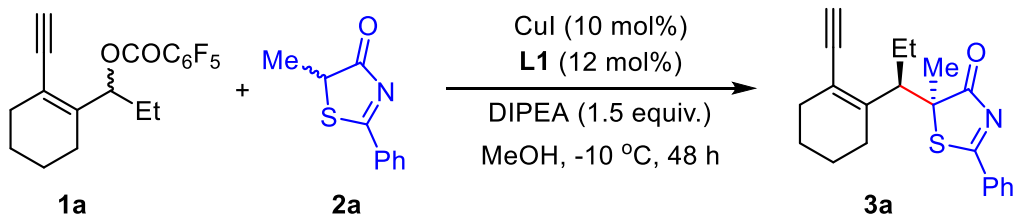

To a mixture of CuI (10 mol%), **L12** (12 mol%), Yne-Allylic Esters **1a** (2 mmol), thiazolidinone **2a** (3 mmol) and DIPEA (3 mmol) was added CH<sub>3</sub>OH (15 mL) at -10 °C under nitrogen atmosphere. Upon complete consumption of Yne-Allylic Esters **1a** (TLC monitoring, about 48 h), the solvent was removed under reduced pressure, and the residue was purified by chromatography on silica gel column (hexanes/EtOAc = 20:1, v/v) to afford the desired product **3a** (0.531 g, 79% yield, 93:7 er, 10:1 dr; 98.5:1.5 er, >20:1 dr after recrystallization).

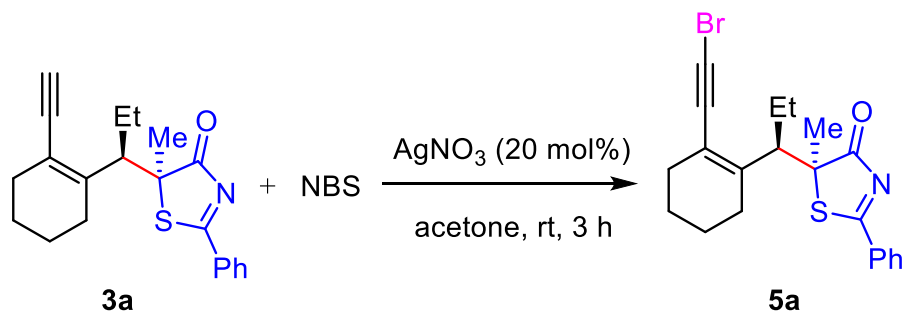

**Procedure:** According to general procedure **3a** (34 mg, 0.1 mmol), AgNO<sub>3</sub> (3.4 mg, 20 mol%) and NBS (21.4 mg, 0.12 mmol) are dissolved in acetone (1 mL) and stirred for 3 hours at room temperature. Removal of the solvent under reduced pressure and purification by chromatography on silica gel (petroleum ether/ethyl acetate, v: v = 20:1) to afford the product **5a**.

**(S)-5-((R)-1-(2-(bromoethynyl)cyclohex-1-en-1-yl)propyl)-5-methyl-2-phenylthiazol-4(5H)-one: 5a**

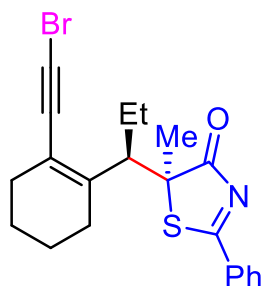

Colorless liquid. 33 mg, 80% yield, 98.4:1.6 er.

<sup>1</sup>H NMR (600 MHz, CDCl<sub>3</sub>): δ 8.16 (d, *J* = 7.8 Hz, 2H), 7.67-7.65 (m, 1H), 7.53-7.50 (m, 2H), 3.73 (dd, *J* = 11.4 and 3.0 Hz, 1H), 2.34-2.24 (m, 2H), 2.07-2.04 (m, 1H), 1.91-1.88 (m, 1H), 1.74-1.68 (m, 2H), 1.62-1.58 (m, 1H), 1.56 (s, 3H), 1.53-1.48 (m, 1H), 1.16-1.11 (m, 1H), 0.86-0.83 (m, 1H), 0.76 (t, *J* = 7.2 Hz, 3H). <sup>13</sup>C NMR (151 MHz, CDCl<sub>3</sub>): δ 196.4, 195.1, 142.1, 134.8, 132.3, 129.0, 128.8, 121.6, 80.2, 67.4, 53.7, 52.7, 30.5, 25.9, 24.8, 22.4, 21.7, 11.4. HRMS (ESI) calcd for C<sub>21</sub>H<sub>23</sub>BrNOS [(M+H)<sup>+</sup>]: 416.0678, found: 416.0676. HPLC analysis of the product: Daicel Chiralpak ODH column; hexane/2-propanol = 95/5, 0.3 mL/min. Retention times: 22.82 min (minor), 20.32 min (major).

<Chromatogram>  
mAU

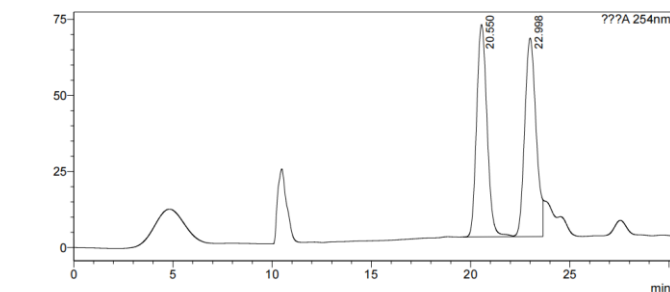

<Peak Table>

| Peak# | Ret. Time | Area    | Height | Conc.  | Unit | Mark | Name |
|-------|-----------|---------|--------|--------|------|------|------|
| 1     | 20.550    | 2563648 | 69811  | 49.582 |      |      |      |
| 2     | 22.998    | 2606878 | 65244  | 50.418 |      | V M  |      |
| Total |           | 5170527 | 135055 |        |      |      |      |

<Chromatogram>  
mAU

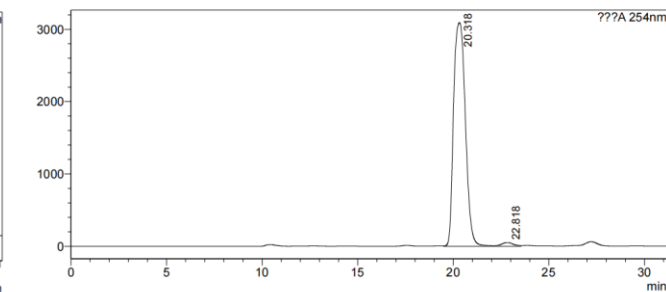

<Peak Table>

| Peak# | Ret. Time | Area      | Height  | Conc.  | Unit | Mark | Name |
|-------|-----------|-----------|---------|--------|------|------|------|
| 1     | 20.318    | 132601887 | 3091941 | 98.360 |      |      |      |
| 2     | 22.818    | 2210554   | 49965   | 1.640  |      | V    |      |
| Total |           | 134812441 | 3141906 |        |      |      |      |

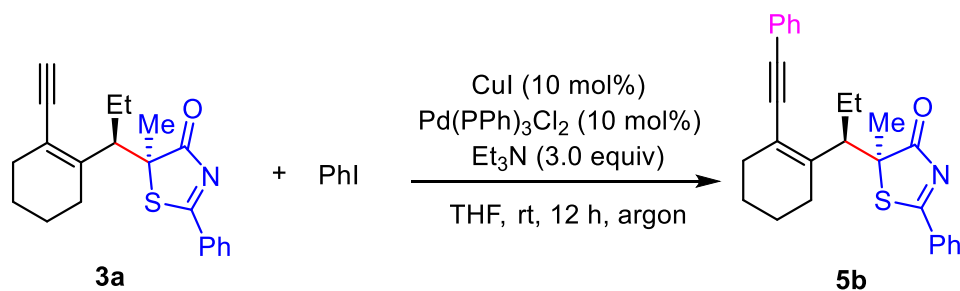

**Procedure:** Iodobenzene (30.6 mg, 0.15 mmol) and **3a** (34 mg, 0.1 mmol) were dissolved in THF, and  $\text{Et}_3\text{N}$  (30.4 mg, 0.3 mmol),  $\text{Pd(PPh}_3)_2\text{Cl}_2$  (7 mg, 0.01 mmol) and  $\text{CuI}$  (1.9 mg, 0.01 mmol) were added. The mixture was stirred at room temperature under argon atmosphere for 12 h. When the reaction was completed as monitored by TLC, the solution was quenched carefully with saturated  $\text{NH}_4\text{Cl}$  solution and then warmed to room temperature. The product was extracted with ethyl acetate (5 mL  $\times$  3), and dried over anhydrous  $\text{Na}_2\text{SO}_4$ . After filtration and evaporation in vacuo, the residue was purified by flash chromatography on silica gel (petroleum ether/ethyl acetate, v: v = 20:1) to afford the product **5b**.

**(S)-5-methyl-2-phenyl-5-((R)-1-(2-(phenylethynyl)cyclohex-1-en-1-yl)propyl)thiazol-4(5H)-one: 5b**

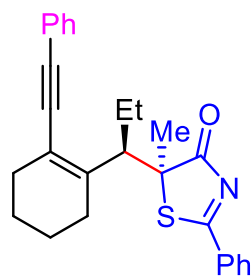

Yellow liquid. 32 mg, 77% yield, 98.4:1.6 er.

$^1\text{H NMR}$  (600 MHz,  $\text{CDCl}_3$ ):  $\delta$  8.18 (d,  $J = 7.8$  Hz, 2H), 7.68-7.65 (m, 1H), 7.60-7.59 (m, 2H), 7.54-7.51 (m, 2H), 7.35-7.33 (m, 2H), 7.31-7.28 (m, 1H), 4.04 (dd,  $J = 11.4$  and  $3.6$  Hz, 1H), 2.44-2.36 (m, 2H), 2.14-2.11 (m, 1H), 1.98-1.96 (m, 1H), 1.80-1.66 (m, 4H), 1.63 (s, 3H), 1.60-1.52 (m, 1H), 1.18-1.13 (m, 1H), 0.81 (t,  $J = 7.2$  Hz, 3H).  $^{13}\text{C NMR}$  (151 MHz,  $\text{CDCl}_3$ ):  $\delta$  196.7, 195.1, 140.8, 134.8, 132.4, 131.6, 129.0, 128.8, 128.3, 127.9, 123.7, 121.9, 93.2, 89.8, 67.6, 53.7, 30.4, 25.9, 24.9, 22.5, 22.4, 21.8, 11.6. HRMS (ESI) calcd for  $\text{C}_{27}\text{H}_{28}\text{NOS}$  [ $(\text{M}+\text{H}^+)$ ]: 414.1886, found: 414.1884. HPLC analysis of the product: Daicel Chiralpak ODH column; hexane/2-propanol = 95/5, 0.3 mL/min. Retention times: 20.30 min (minor), 17.57 min (major).

<Chromatogram>  
mAU

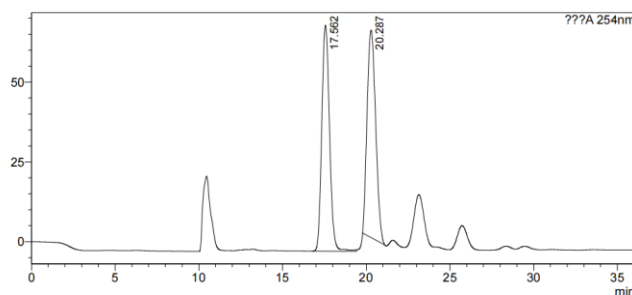

<Peak Table>

| Peak# | Ret. Time | Area    | Height | Conc.  | Unit | Mark | Name |
|-------|-----------|---------|--------|--------|------|------|------|
| 1     | 17.562    | 2281674 | 70766  | 49.628 |      | S M  |      |
| 2     | 20.287    | 2315846 | 65018  | 50.372 |      | M    |      |
| Total |           | 4597520 | 135783 |        |      |      |      |

<Chromatogram>  
mAU

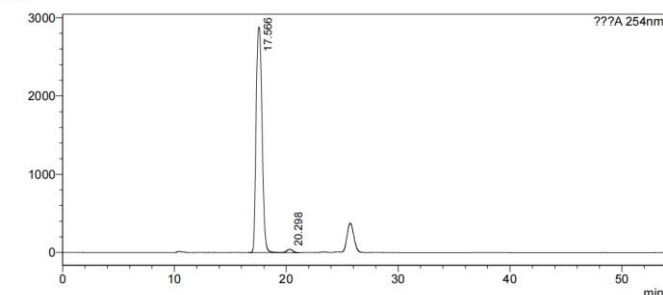

<Peak Table>

| Peak# | Ret. Time | Area      | Height  | Conc.  | Unit | Mark | Name |
|-------|-----------|-----------|---------|--------|------|------|------|
| 1     | 17.566    | 106516256 | 2887108 | 98.394 |      |      |      |
| 2     | 20.298    | 1738912   | 44804   | 1.606  |      | V    |      |
| Total |           | 108255168 | 2931913 |        |      |      |      |

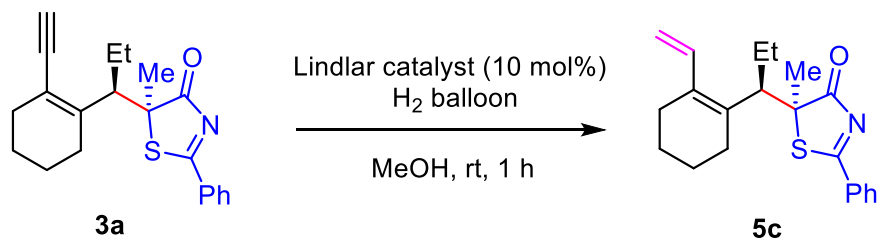

**Procedure:** In a flask were placed **3a** (34 mg, 0.1 mmol), 10 mol% Lindlar catalyst (2 mg) and 1 mL MeOH, and the mixture was stirred using a magnetic stirrer at room temperature under a hydrogen atmosphere for 1 h. When the reaction was completed as monitored by TLC, the EA was added, and then the mixture was passed through a membrane filter. After filtration and evaporation in vacuo, the residue was purified by flash chromatography on silica gel (petroleum ether/ethyl acetate, v: v = 20:1) to afford the product **5c**.

**(S)-5-methyl-2-phenyl-5-((R)-1-(2-vinylcyclohex-1-en-1-yl)propyl)thiazol-4(5H)-one: 5c**

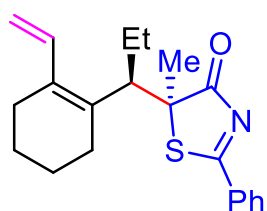

Colorless liquid. 33 mg, 97% yield, 98.8:1.2 er.

$^1\text{H NMR}$  (600 MHz,  $\text{CDCl}_3$ ):  $\delta$  8.17 (d,  $J = 7.8$  Hz, 2H), 7.68-7.66 (m, 1H), 7.53-7.51 (m, 2H), 7.11 (dd,  $J = 16.8$  and 10.8 Hz, 1H), 5.25 (d,  $J = 16.8$  Hz, 1H), 5.08 (d,  $J = 10.8$  Hz, 1H), 3.70 (dd,  $J = 10.8$  and 3.6 Hz, 1H), 2.36-2.27 (m, 2H), 2.14-2.11 (m, 1H), 1.92-1.89 (m, 1H), 1.74-1.72 (m, 2H), 1.65-1.63 (m, 1H), 1.60-1.56 (m, 2H), 1.47 (s, 3H), 1.12-1.07 (m, 1H), 0.71 (t,  $J = 7.2$  Hz, 3H).  $^{13}\text{C NMR}$  (151 MHz,  $\text{CDCl}_3$ ):  $\delta$  197.8, 195.9, 139.3, 134.8, 132.4, 128.9, 128.8, 124.9, 67.8, 49.5, 29.5, 26.3, 26.2, 24.5, 23.3, 23.1, 21.7, 13.1, 11.8. HRMS (ESI) calcd for  $\text{C}_{21}\text{H}_{26}\text{NOS}$  [(M+H $^+$ )]: 340.1730, found: 340.1727. HPLC analysis of the product: Daicel Chiralpak ADH column; hexane/2-propanol = 95/5, 0.5 mL/min. Retention times: 19.98 min (minor), 16.33 min (major).

<Chromatogram>  
mAU

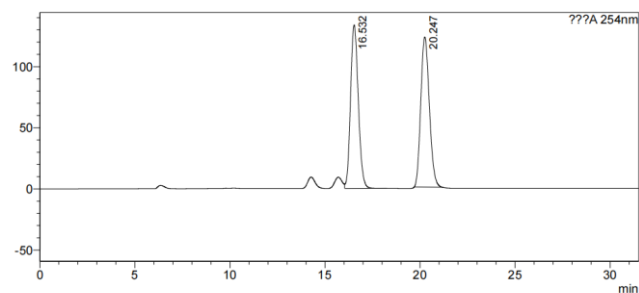

<Peak Table>

| Peak# | Ret. Time | Area    | Height | Conc.  | Unit | Mark | Name |
|-------|-----------|---------|--------|--------|------|------|------|
| 1     | 16.532    | 3784688 | 133607 | 49.584 |      |      |      |
| 2     | 20.247    | 3848191 | 122838 | 50.416 |      | M    |      |
| Total |           | 7632879 | 256246 |        |      |      |      |

<Chromatogram>  
mAU

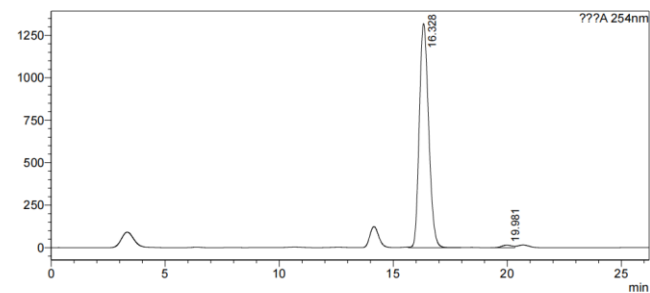

<Peak Table>

| Peak# | Ret. Time | Area     | Height  | Conc.  | Unit | Mark | Name |
|-------|-----------|----------|---------|--------|------|------|------|
| 1     | 16.328    | 37603776 | 1318609 | 98.775 |      | M    |      |
| 2     | 19.981    | 466372   | 15375   | 1.225  |      |      |      |
| Total |           | 38070149 | 1333983 |        |      |      |      |



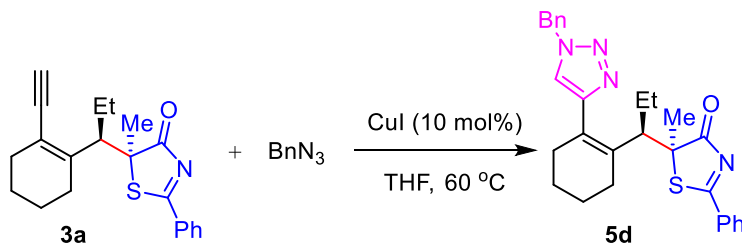

**Procedure:** BnN<sub>3</sub> (40 mg, 0.3 mmol) and **3a** (34 mg, 0.1 mmol) were dissolved in THF, and CuI (1.9 mg, 0.01 mmol) were added. The mixture was stirred at 60 °C (oil bath temperature) under argon atmosphere for 12 h. When the reaction was completed as monitored by TLC. After filtration and evaporation in vacuo, the residue was purified by flash chromatography on silica gel (petroleum ether/ethyl acetate, v: v = 20:1) to afford the product **5d**.

**(S)-5-((R)-1-(2-(1-benzyl-1H-1,2,3-triazol-5-yl)cyclohex-1-en-1-yl)propyl)-5-methyl-2-phenylthiazol-4(5H)-one: 5d**

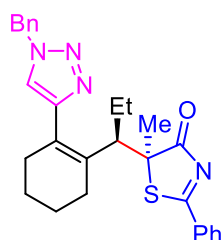

White solid. 33 mg, 70% yield, 99.3:0.7 er.

<sup>1</sup>H NMR (600 MHz, CDCl<sub>3</sub>): δ 8.15 (d, *J* = 7.8 Hz, 2H), 7.66-7.64 (m, 1H), 7.52-7.49 (m, 2H), 7.46 (s, 1H), 7.42-7.40 (m, 2H), 7.35-7.30 (m, 3H), 5.63-5.57 (m, 2H), 3.46 (dd, *J* = 10.8 and 3.0 Hz, 1H), 2.54-2.46 (m, 2H), 2.16-2.13 (m, 1H), 1.93-1.91 (m, 1H), 1.79-1.77 (m, 2H), 1.73-1.62 (m, 2H), 1.60-1.52 (m, 1H), 1.48 (s, 3H), 1.05-1.00 (m, 1H), 0.67 (t, *J* = 7.2 Hz, 3H). <sup>13</sup>C NMR (151 MHz, CDCl<sub>3</sub>): δ 197.0, 195.5, 148.3, 134.9, 134.8, 133.2, 132.3, 129.4, 129.1, 128.9, 128.7, 128.5, 127.7, 121.4, 67.4, 54.0, 50.7, 31.4, 26.2, 24.8, 22.8, 22.6, 21.9, 11.7. HRMS (ESI) calcd for C<sub>28</sub>H<sub>31</sub>N<sub>4</sub>OS [(M+H)<sup>+</sup>]: 471.2213, found: 471.2211. HPLC analysis of the product: Daicel Chiralpak IB-3 column; hexane/2-propanol = 94/6, 0.4 mL/min. Retention times: 89.08 min (minor), 92.80 min (major).

<Chromatogram>  
mAU

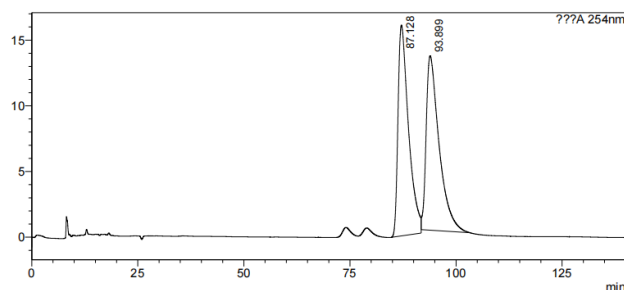

<Peak Table>  
???A 254nm

| Peak# | Ret. Time | Area    | Height | Conc.  | Unit | Mark | Name |
|-------|-----------|---------|--------|--------|------|------|------|
| 1     | 87.128    | 2770969 | 16039  | 49.463 |      | M    |      |
| 2     | 93.899    | 2831087 | 13285  | 50.537 |      | M    |      |
| Total |           | 5602056 | 29324  |        |      |      |      |

<Chromatogram>  
mAU

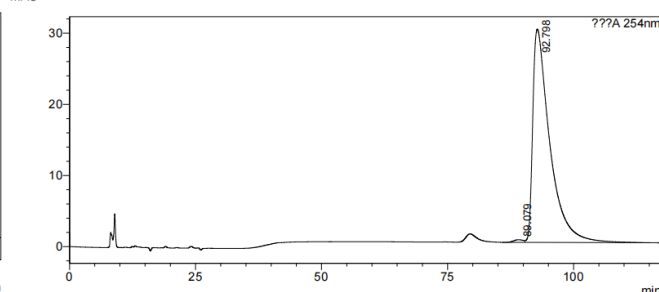

<Peak Table>  
???A 254nm

| Peak# | Ret. Time | Area    | Height | Conc.  | Unit | Mark | Name |
|-------|-----------|---------|--------|--------|------|------|------|
| 1     | 89.079    | 48505   | 370    | 0.683  |      | M    |      |
| 2     | 92.798    | 7058205 | 30002  | 99.317 |      | V M  |      |
| Total |           | 7106710 | 30372  |        |      |      |      |

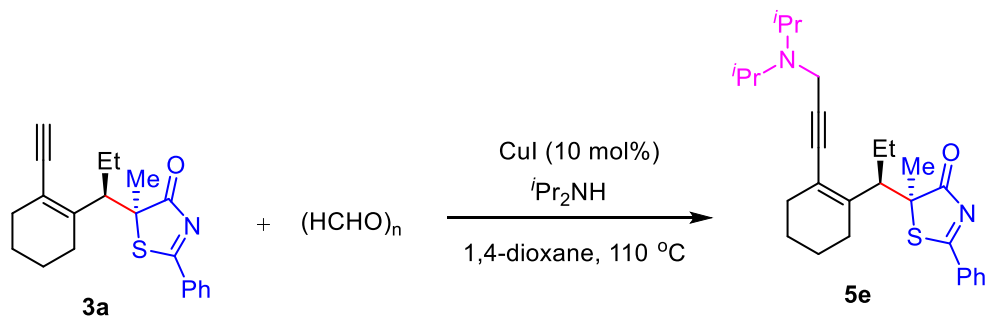

**Procedure:**  $(\text{HCHO})_n$  (5.1 mg, 0.16 mmol),  $^i\text{Pr}_2\text{NH}$  (14.2 mg, 0.14 mmol) and **3a** (34 mg, 0.1 mmol) were dissolved in 1,4-dioxane, and CuI (1.9 mg, 0.01 mmol) were added. The mixture was stirred at 110 °C (oil bath temperature) under air atmosphere for 12 h. When the reaction was completed as monitored by TLC. After filtration and evaporation in vacuo, the residue was purified by flash chromatography on silica gel (petroleum ether/ethyl acetate, v: v = 20:1) to afford the product **5e**.

**(S)-5-((R)-1-(2-(3-(diisopropylamino)prop-1-yn-1-yl)cyclohex-1-en-1-yl)propyl)-5-methyl-2-phenylthiazol-4(5H)-one: 5e**

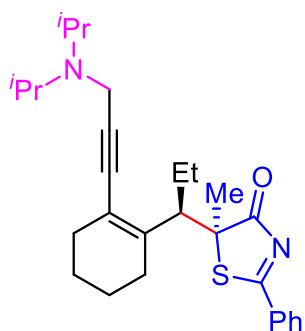

Yellow liquid. 36 mg, 80% yield, 98.2:1.8 er.

$^1\text{H}$  NMR (600 MHz,  $\text{CDCl}_3$ ):  $\delta$  8.16 (d,  $J = 7.8$  Hz, 2H), 7.67-7.64 (m, 1H), 7.52-7.50 (m, 2H), 3.83 (dd,  $J = 11.4$  and 3.6 Hz, 1H), 3.69 (s, 2H), 3.38-3.32 (m, 2H), 2.29-2.23 (m, 2H), 2.06-2.03 (m, 1H), 1.88-1.85 (m, 1H), 1.75-1.66 (m, 2H), 1.61-1.57 (m, 2H), 1.55 (s, 3H), 1.52-1.47 (m, 1H), 1.17 (d,  $J = 6.0$  Hz, 12H), 1.14-1.06 (m, 1H), 0.75 (t,  $J = 7.2$  Hz, 3H).  $^{13}\text{C}$  NMR (151 MHz,  $\text{CDCl}_3$ ):  $\delta$  196.6, 195.0, 138.7, 134.8, 132.4, 128.9, 128.8, 122.1, 92.2, 83.9,

67.5, 53.6, 48.3, 34.7, 31.5, 30.8, 30.1, 29.7, 25.8, 24.6, 22.55, 22.50, 21.7, 20.65, 20.57, 11.4. HRMS (ESI) calcd for  $\text{C}_{28}\text{H}_{39}\text{N}_2\text{OS}$  [ $\text{M}+\text{H}^+$ ]: 451.2778, found: 451.2775. HPLC analysis of the product: Daicel Chiralpak ADH column; hexane/2-propanol = 97/3, 0.3 mL/min. Retention times: 22.99 min (minor), 21.19 min (major).

<Chromatogram>  
mAU

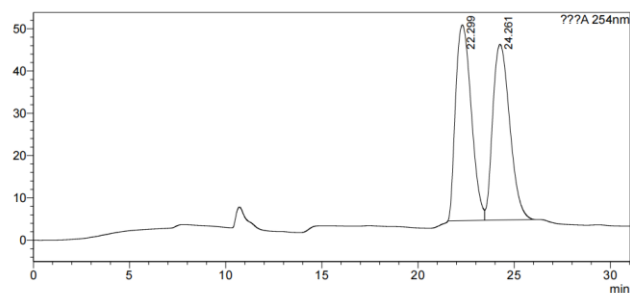

<Peak Table>

| Peak# | Ret. Time | Area    | Height | Conc.  | Unit | Mark | Name |
|-------|-----------|---------|--------|--------|------|------|------|
| 1     | 22.299    | 2622342 | 46260  | 50.593 |      | M    |      |
| 2     | 24.261    | 2560825 | 41546  | 49.407 |      | V M  |      |
| Total |           | 5183167 | 87806  |        |      |      |      |

<Chromatogram>  
mAU

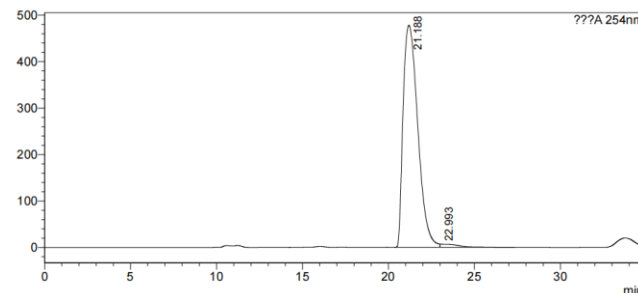

<Peak Table>

| Peak# | Ret. Time | Area     | Height | Conc.  | Unit | Mark | Name |
|-------|-----------|----------|--------|--------|------|------|------|
| 1     | 21.188    | 28381110 | 477860 | 98.143 |      | M    |      |
| 2     | 22.993    | 537057   | 7001   | 1.857  |      | V M  |      |
| Total |           | 28918166 | 484861 |        |      |      |      |

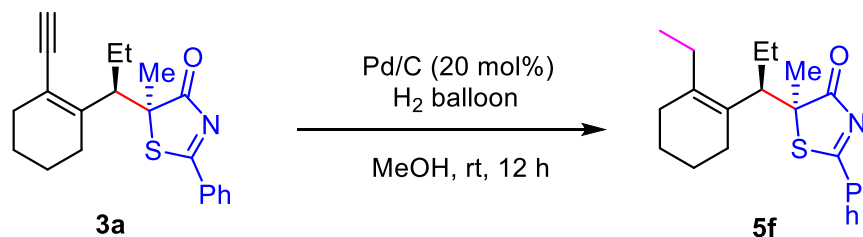

**Procedure:** In a flask were placed **3a** (34 mg, 0.1 mmol), 20 mol% Pd/C (2 mg) and 1 mL MeOH, and the mixture was stirred using a magnetic stirrer at room temperature under a hydrogen atmosphere for 12 h. When the reaction was completed as monitored by TLC, the EA was added, and then the mixture was passed through a membrane filter. After filtration and evaporation in vacuo, the residue was purified by flash chromatography on silica gel (petroleum ether/ethyl acetate, v: v = 20:1) to afford the product **5f**.

**(S)-5-((R)-1-(2-propylcyclohex-1-en-1-yl)propyl)-5-methyl-2-phenylthiazol-4(5H)-one: 5f**

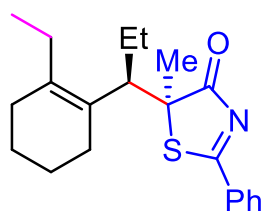

Colorless liquid. 25 mg, 73% yield, 97.3:2.7 er.

$^1\text{H}$  NMR (600 MHz,  $\text{CDCl}_3$ ):  $\delta$  8.17 (d,  $J = 7.8$  Hz, 2H), 7.67-7.64 (m, 1H), 7.52-7.50 (m, 2H), 3.39 (dd,  $J = 10.8$  and 3.0 Hz, 1H), 2.32-2.26 (m, 1H), 2.13-2.05 (m, 3H), 1.97-1.95 (m, 1H), 1.76-1.73 (m, 1H), 1.69-1.54 (m, 5H), 1.50 (s, 3H), 1.01 (t,  $J = 7.8$  Hz, 3H), 0.96-0.83 (m, 1H), 0.72 (t,  $J = 7.2$  Hz, 3H).  $^{13}\text{C}$  NMR (151 MHz,  $\text{CDCl}_3$ ):  $\delta$  197.8, 195.9, 139.3, 134.8, 132.4, 128.9, 128.8, 124.9, 67.8, 49.5, 29.5, 26.3, 26.2, 24.5, 23.3, 23.1, 21.7, 13.1, 11.8. HRMS (ESI) calcd for  $\text{C}_{21}\text{H}_{28}\text{NOS}$  [(M+H) $^+$ ]: 342.1886, found: 342.1881. HPLC analysis of the product: Daicel Chiralpak ADH column; hexane/2-propanol = 95/5, 0.5 mL/min. Retention times: 15.75 min (minor), 14.15 min (major).

<Chromatogram>  
mAU

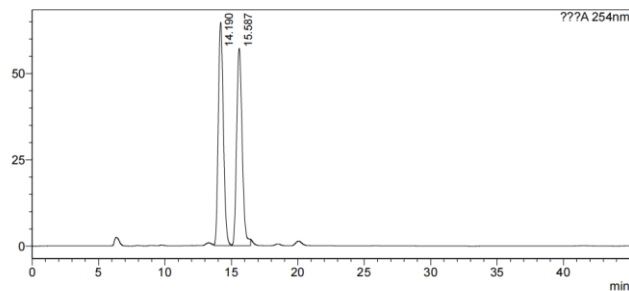

<Peak Table>

| Peak# | Ret. Time | Area    | Height | Conc.  | Unit | Mark | Name |
|-------|-----------|---------|--------|--------|------|------|------|
| 1     | 14.190    | 1723485 | 64651  | 50.965 |      |      |      |
| 2     | 15.587    | 1658231 | 57072  | 49.035 |      | V M  |      |
| Total |           | 3381716 | 121723 |        |      |      |      |

<Chromatogram>  
mAU

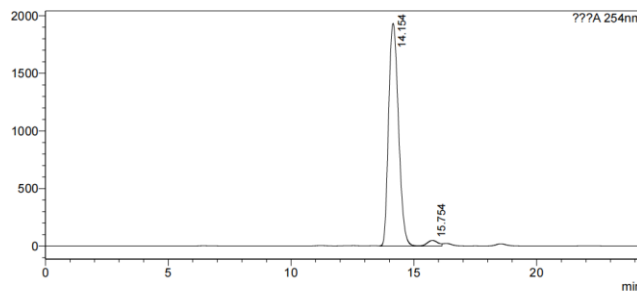

<Peak Table>

| Peak# | Ret. Time | Area     | Height  | Conc.  | Unit | Mark | Name |
|-------|-----------|----------|---------|--------|------|------|------|
| 1     | 14.154    | 54141181 | 1932381 | 97.273 |      |      |      |
| 2     | 15.754    | 1518051  | 49797   | 2.727  |      | V    |      |
| Total |           | 55659232 | 1982178 |        |      |      |      |

## 6. References.

[1] a) H.-H. Kong, C. Zhu, S. Deng, G. Xu, R. Zhao, C. Yao, H.-M. Xiang, C. Zhao, X. Qi, H. Xu, *J. Am. Chem. Soc.* **2022**, *144*, 21347–21355; b) M.-D. Li, Z.-H. Wang, H. Zhu, X.-R. Wang, J.-R. Wang, T.-Y. Lin, *Angew. Chem. Int. Ed.* **2023**, e202313911.

[2] a) T.-C. Wang, Z.-Y. Han, P.-S. Wang, H.-C. Lin, S.-W. Luo, L.-Z. Gong, *Org. Lett.* **2018**, *20*, 4740–4744; b) F. A. J. Kerdesky, J. H. Holms, J. L. Moore, R. L. Bell, R. D. Dyer, G. W. Carter, D. W. Brooks. *J. Med. Chem.* **1991**, *34*, 2158–2165.

## 7. Crystal Structure of (*S,R*)-**3a**

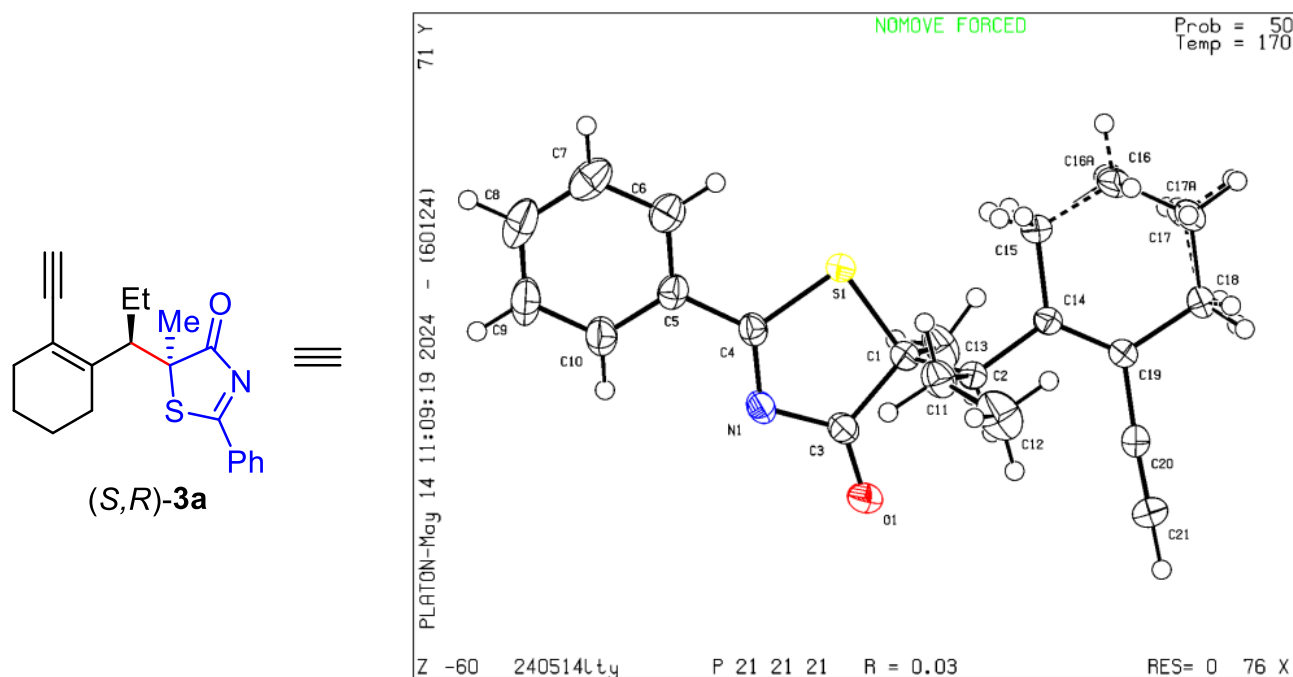

Method for single crystals cultivation: **3a** (50.0 mg) was dissolved in *n*-hexane/ dichloromethane (v/v =80:20, 2.0 mL) in a vial at room temperature. The vial was properly sealed with parafilm and kept at 25 °C to allow the slow evaporation of the solvents until a single crystal was obtained. The absolute configuration of compound (*S,R*)-**3a** is determined by anomalous dispersion with Ga K $\alpha$  radiation ( $\lambda = 1.34139 \text{ \AA}$ ) as X-ray source for X-ray diffraction experiment, and a Flack parameter of -0.01(2) is obtained as result. This crystal was deposited in the Cambridge Crystallographic Data Centre and assigned as CCDC 2372766.

**Table 1** Crystal data and structure refinement for 240514lty.

|                                             |                                          |
|---------------------------------------------|------------------------------------------|
| Identification code                         | 240514lty                                |
| Empirical formula                           | C <sub>21</sub> H <sub>23</sub> NOS      |
| Formula weight                              | 337.46                                   |
| Temperature/K                               | 170.00                                   |
| Crystal system                              | orthorhombic                             |
| Space group                                 | P212121                                  |
| a/Å                                         | 10.7747(2)                               |
| b/Å                                         | 11.7976(2)                               |
| c/Å                                         | 14.5095(3)                               |
| α / °                                       | 90                                       |
| β / °                                       | 90                                       |
| γ / °                                       | 90                                       |
| Volume/Å <sup>3</sup>                       | 1844.38(6)                               |
| Z                                           | 4                                        |
| ρ calcg/cm <sup>3</sup>                     | 1.215                                    |
| μ /mm-1                                     | 1.044                                    |
| F(000)                                      | 720.0                                    |
| Crystal size/mm <sup>3</sup>                | 0.17 × 0.17 × 0.05                       |
| Radiation                                   | GaKα (λ = 1.34139)                       |
| 2θ range for data collection/°              | 8.404 to 109.782                         |
| Index ranges                                | -12 ≤ h ≤ 13, -14 ≤ k ≤ 14, -17 ≤ l ≤ 17 |
| Reflections collected                       | 16049                                    |
| Independent reflections                     | 3491 [Rint = 0.0515, Rsigma = 0.0387]    |
| Data/restraints/parameters                  | 3491/65/238                              |
| Goodness-of-fit on F <sup>2</sup>           | 1.032                                    |
| Final R indexes [I ≥ 2σ (I)]                | R1 = 0.0277, wR2 = 0.0724                |
| Final R indexes [all data]                  | R1 = 0.0288, wR2 = 0.0733                |
| Largest diff. peak/hole / e Å <sup>-3</sup> | 0.30/-0.20                               |
| Flack parameter                             | 0.026(8)                                 |

**Table 2** Fractional Atomic Coordinates ( $\times 10^4$ ) and Equivalent Isotropic Displacement Parameters ( $\text{\AA}^2 \times 10^3$ ) for 240514lty. Ueq is defined as 1/3 of the trace of the orthogonalised Uij tensor.

| Atom | x          | y          | z          | U(eq)     |
|------|------------|------------|------------|-----------|
| S1   | 3202.3(5)  | 3425.3(4)  | 3233.6(3)  | 36.58(15) |
| O1   | 1687.1(16) | 784.7(12)  | 2199.3(10) | 39.7(4)   |
| N1   | 2214.9(15) | 1452.0(14) | 3629.5(11) | 28.8(4)   |
| C14  | 3939.4(17) | 3324.6(16) | 873.2(12)  | 22.7(4)   |
| C2   | 3614.0(18) | 2348.8(15) | 1509.1(12) | 25.4(4)   |
| C19  | 3852.9(17) | 3212.5(16) | -47.6(13)  | 23.8(4)   |
| C5   | 2965.9(19) | 2459.6(16) | 4974.8(14) | 28.6(4)   |
| C18  | 4196.1(19) | 4149.1(17) | -723.0(14) | 29.5(4)   |
| C3   | 2123.4(18) | 1529.0(17) | 2666.9(13) | 28.1(4)   |
| C1   | 2613.1(19) | 2646.6(16) | 2239.1(13) | 27.0(4)   |
| C20  | 3473(2)    | 2159.6(17) | -464.9(13) | 31.5(4)   |
| C11  | 4772(2)    | 1802.0(18) | 1940.2(15) | 35.6(5)   |
| C15  | 4432(2)    | 4405.6(16) | 1297.5(14) | 31.3(5)   |
| C6   | 3766(2)    | 3287(2)    | 5320.0(15) | 36.6(5)   |
| C13  | 1508(2)    | 3271.5(19) | 1810.0(17) | 40.9(5)   |
| C10  | 2360(2)    | 1729.6(19) | 5583.2(14) | 36.8(5)   |
| C4   | 2746.6(18) | 2338.3(17) | 3978.4(13) | 26.6(4)   |
| C21  | 3221(3)    | 1301.7(18) | -847.5(15) | 43.0(6)   |
| C7   | 3954(2)    | 3382(2)    | 6266.6(16) | 45.8(6)   |
| C9   | 2549(3)    | 1840(2)    | 6522.9(15) | 48.6(6)   |
| C8   | 3340(3)    | 2662(2)    | 6860.3(16) | 51.0(6)   |
| C12  | 5629(2)    | 1284(2)    | 1230(2)    | 54.5(7)   |
| C16  | 4469(5)    | 5411(4)    | 638(3)     | 31.5(11)  |
| C17  | 4982(5)    | 5072(3)    | -297(2)    | 32.3(11)  |
| C17A | 4268(8)    | 5294(5)    | -254(4)    | 29.8(16)  |
| C16A | 5010(9)    | 5201(8)    | 628(6)     | 35.8(18)  |

**Table 3** Anisotropic Displacement Parameters ( $\text{\AA}^2 \times 10^3$ ) for 240514lty. The Anisotropic displacement factor exponent takes the form:  $-2\pi^2[h^2a^2U_{11}+2hka^*b^*U_{12}+\dots]$ .

| Atom | U11      | U22      | U33      | U23       | U13       | U12       |
|------|----------|----------|----------|-----------|-----------|-----------|
| S1   | 60.3(3)  | 24.0(2)  | 25.4(2)  | -2.70(19) | 9.3(2)    | -10.8(2)  |
| O1   | 53.6(9)  | 30.8(8)  | 34.7(8)  | 1.6(6)    | -5.3(7)   | -14.8(7)  |
| N1   | 32.2(8)  | 27.2(8)  | 26.9(8)  | 5.8(7)    | 1.1(7)    | -2.7(7)   |
| C14  | 24.6(9)  | 20.1(9)  | 23.5(9)  | 0.4(8)    | -0.3(7)   | 0.1(8)    |
| C2   | 34.3(10) | 20.0(9)  | 22.0(9)  | -0.1(7)   | 0.5(7)    | -0.2(8)   |
| C19  | 25.6(9)  | 21.7(9)  | 24.0(9)  | 1.4(7)    | 0.5(7)    | -2.1(7)   |
| C5   | 31.3(10) | 29.3(10) | 25.3(9)  | -0.8(8)   | 2.7(8)    | 9.0(8)    |
| C18  | 37.0(11) | 27.9(10) | 23.8(9)  | 4.3(8)    | 0.6(8)    | -5.7(8)   |
| C3   | 30.0(9)  | 25.3(9)  | 29.1(9)  | 3.4(8)    | 0.5(8)    | -2.5(8)   |
| C1   | 34.5(10) | 21.5(9)  | 24.9(9)  | 1.6(7)    | 1.2(8)    | -1.3(8)   |
| C20  | 41.0(12) | 31.3(11) | 22.3(9)  | 1.2(8)    | 1.5(8)    | -7.2(9)   |
| C11  | 38.0(11) | 30.9(10) | 37.7(11) | 8.4(9)    | -1.0(9)   | 6.3(9)    |
| C15  | 42.7(12) | 25.3(10) | 25.8(10) | -1.4(8)   | -1.9(9)   | -7.9(9)   |
| C6   | 34.6(11) | 41.4(12) | 33.9(11) | -2.7(10)  | 0.3(9)    | 4.7(10)   |
| C13  | 37.0(11) | 37.0(11) | 48.6(12) | 15.3(10)  | 7.9(10)   | 7.0(9)    |
| C10  | 45.3(12) | 36.2(12) | 29.0(10) | 3.5(9)    | 7.3(9)    | 6.2(10)   |
| C4   | 28.5(10) | 26.2(9)  | 24.9(10) | 2.8(8)    | 5.2(8)    | 2.9(8)    |
| C21  | 63.5(15) | 33.3(11) | 32.0(11) | -6.8(9)   | 0.8(11)   | -14.6(11) |
| C7   | 44.0(12) | 53.5(14) | 39.9(12) | -12.4(12) | -11.5(10) | 12.4(12)  |
| C9   | 66.7(16) | 53.1(15) | 26.1(11) | 7.9(10)   | 9.8(11)   | 13.1(13)  |
| C8   | 64.5(16) | 61.9(15) | 26.4(11) | -3.9(11)  | -4.3(12)  | 22.2(14)  |
| C12  | 48.3(14) | 44.5(15) | 70.7(18) | 13.9(13)  | 13.1(14)  | 21.6(11)  |
| C16  | 37(3)    | 23.6(19) | 33.9(19) | 0.4(15)   | 0(2)      | -6.7(18)  |
| C17  | 38(3)    | 28.3(18) | 30.4(18) | 5.2(13)   | 2.7(17)   | -10.5(17) |
| C17A | 37(4)    | 22(3)    | 30(3)    | 5(2)      | 2(3)      | -4(3)     |
| C16A | 43(4)    | 32(4)    | 33(3)    | 3(3)      | -6(4)     | -18(3)    |



**Table 4** Bond Lengths for 240514lty.

| Atom | Atom | Length/Å   | Atom | Atom | Length/Å  |
|------|------|------------|------|------|-----------|
| S1   | C1   | 1.825(2)   | C18  | C17  | 1.511(4)  |
| S1   | C4   | 1.7475(19) | C18  | C17A | 1.514(6)  |
| O1   | C3   | 1.205(2)   | C3   | C1   | 1.550(3)  |
| N1   | C3   | 1.403(2)   | C1   | C13  | 1.533(3)  |
| N1   | C4   | 1.295(3)   | C20  | C21  | 1.186(3)  |
| C14  | C2   | 1.516(2)   | C11  | C12  | 1.513(3)  |
| C14  | C19  | 1.346(3)   | C15  | C16  | 1.524(5)  |
| C14  | C15  | 1.512(3)   | C15  | C16A | 1.488(8)  |
| C2   | C1   | 1.552(3)   | C6   | C7   | 1.393(3)  |
| C2   | C11  | 1.538(3)   | C10  | C9   | 1.385(3)  |
| C19  | C18  | 1.522(3)   | C7   | C8   | 1.379(4)  |
| C19  | C20  | 1.441(3)   | C9   | C8   | 1.381(4)  |
| C5   | C6   | 1.395(3)   | C16  | C17  | 1.519(6)  |
| C5   | C10  | 1.395(3)   | C17A | C16A | 1.513(10) |
| C5   | C4   | 1.472(3)   |      |      |           |

**Table 5** Bond Angles for 240514lty.

| Atom | Atom | Atom | Angle/°    | Atom | Atom | Atom | Angle/°    |
|------|------|------|------------|------|------|------|------------|
| C4   | S1   | C1   | 91.25(9)   | C3   | C1   | C2   | 108.50(15) |
| C4   | N1   | C3   | 111.58(17) | C13  | C1   | S1   | 110.45(15) |
| C19  | C14  | C2   | 120.89(16) | C13  | C1   | C2   | 111.81(16) |
| C19  | C14  | C15  | 120.75(17) | C13  | C1   | C3   | 107.91(16) |
| C15  | C14  | C2   | 118.27(15) | C21  | C20  | C19  | 175.8(2)   |
| C14  | C2   | C1   | 113.83(15) | C12  | C11  | C2   | 112.79(19) |
| C14  | C2   | C11  | 112.23(16) | C14  | C15  | C16  | 114.2(2)   |
| C11  | C2   | C1   | 112.41(16) | C16A | C15  | C14  | 114.4(4)   |
| C14  | C19  | C18  | 123.42(17) | C7   | C6   | C5   | 120.0(2)   |
| C14  | C19  | C20  | 121.42(17) | C9   | C10  | C5   | 119.8(2)   |
| C20  | C19  | C18  | 115.10(16) | N1   | C4   | S1   | 118.36(14) |
| C6   | C5   | C4   | 121.31(18) | N1   | C4   | C5   | 122.23(18) |
| C10  | C5   | C6   | 119.58(19) | C5   | C4   | S1   | 119.41(15) |
| C10  | C5   | C4   | 119.10(19) | C8   | C7   | C6   | 119.7(2)   |
| C17  | C18  | C19  | 113.30(19) | C8   | C9   | C10  | 120.4(2)   |
| C17A | C18  | C19  | 111.8(3)   | C7   | C8   | C9   | 120.5(2)   |
| O1   | C3   | N1   | 122.73(18) | C17  | C16  | C15  | 111.4(4)   |
| O1   | C3   | C1   | 121.81(17) | C18  | C17  | C16  | 110.5(4)   |
| N1   | C3   | C1   | 115.46(17) | C16A | C17A | C18  | 110.0(6)   |
| C2   | C1   | S1   | 114.33(14) | C15  | C16A | C17A | 112.1(6)   |
| C3   | C1   | S1   | 103.30(12) |      |      |      |            |

**Table 6** Torsion Angles for 240514lty.

| A   | B    | C    | D    | Angle/°     | A   | B   | C   | D    | Angle/°     |
|-----|------|------|------|-------------|-----|-----|-----|------|-------------|
| O1  | C3   | C1   | S1   | -178.15(17) | C1  | S1  | C4  | N1   | 0.21(17)    |
| O1  | C3   | C1   | C2   | -56.4(3)    | C1  | S1  | C4  | C5   | -179.26(16) |
| O1  | C3   | C1   | C13  | 64.9(3)     | C1  | C2  | C11 | C12  | 167.77(18)  |
| N1  | C3   | C1   | S1   | 2.4(2)      | C20 | C19 | C18 | C17  | -160.5(3)   |
| N1  | C3   | C1   | C2   | 124.06(18)  | C20 | C19 | C18 | C17A | 165.6(4)    |
| N1  | C3   | C1   | C13  | -114.62(19) | C11 | C2  | C1  | S1   | 49.2(2)     |
| C14 | C2   | C1   | S1   | -79.77(18)  | C11 | C2  | C1  | C3   | -65.4(2)    |
| C14 | C2   | C1   | C3   | 165.55(15)  | C11 | C2  | C1  | C13  | 175.68(17)  |
| C14 | C2   | C1   | C13  | 46.7(2)     | C15 | C14 | C2  | C1   | 58.9(2)     |
| C14 | C2   | C11  | C12  | -62.4(2)    | C15 | C14 | C2  | C11  | -70.2(2)    |
| C14 | C19  | C18  | C17  | 16.9(4)     | C15 | C14 | C19 | C18  | -1.9(3)     |
| C14 | C19  | C18  | C17A | -17.0(4)    | C15 | C14 | C19 | C20  | 175.33(18)  |
| C14 | C15  | C16  | C17  | -44.3(5)    | C15 | C16 | C17 | C18  | 59.2(6)     |
| C14 | C15  | C16A | C17A | 42.3(10)    | C6  | C5  | C10 | C9   | 0.6(3)      |
| C2  | C14  | C19  | C18  | -178.43(18) | C6  | C5  | C4  | S1   | -14.6(3)    |
| C2  | C14  | C19  | C20  | -1.2(3)     | C6  | C5  | C4  | N1   | 165.96(19)  |
| C2  | C14  | C15  | C16  | -167.6(3)   | C6  | C7  | C8  | C9   | 0.6(4)      |
| C2  | C14  | C15  | C16A | 165.8(5)    | C10 | C5  | C6  | C7   | -0.1(3)     |
| C19 | C14  | C2   | C1   | -124.47(19) | C10 | C5  | C4  | S1   | 165.48(16)  |
| C19 | C14  | C2   | C11  | 106.4(2)    | C10 | C5  | C4  | N1   | -14.0(3)    |
| C19 | C14  | C15  | C16  | 15.8(4)     | C10 | C9  | C8  | C7   | -0.1(4)     |
| C19 | C14  | C15  | C16A | -10.8(5)    | C4  | S1  | C1  | C2   | -119.04(14) |
| C19 | C18  | C17  | C16  | -44.7(5)    | C4  | S1  | C1  | C3   | -1.35(13)   |
| C19 | C18  | C17A | C16A | 47.0(8)     | C4  | S1  | C1  | C13  | 113.82(15)  |
| C5  | C6   | C7   | C8   | -0.5(3)     | C4  | N1  | C3  | O1   | 178.1(2)    |
| C5  | C10  | C9   | C8   | -0.5(3)     | C4  | N1  | C3  | C1   | -2.4(2)     |
| C18 | C17A | C16A | C15  | -61.2(11)   | C4  | C5  | C6  | C7   | 179.94(19)  |
| C3  | N1   | C4   | S1   | 1.2(2)      | C4  | C5  | C10 | C9   | -179.4(2)   |
| C3  | N1   | C4   | C5   | -179.33(17) |     |     |     |      |             |

**Table 7** Hydrogen Atom Coordinates ( $\text{\AA}\times 10^4$ ) and Isotropic Displacement Parameters ( $\text{\AA}^2\times 10^3$ ) for 240514lty.

| Atom | x       | y       | z        | U(eq) |
|------|---------|---------|----------|-------|
| H2   | 3235.36 | 1753.04 | 1107.43  | 31    |
| H18A | 4653.78 | 3812.12 | -1247.37 | 35    |
| H18B | 3425.26 | 4491.28 | -968.93  | 35    |
| H18C | 5008.69 | 3972.35 | -1007.2  | 35    |
| H18D | 3568.46 | 4179.67 | -1220.69 | 35    |
| H11A | 5233.08 | 2384.42 | 2292.48  | 43    |
| H11B | 4507.97 | 1205.77 | 2378.39  | 43    |
| H15A | 5282.15 | 4263.89 | 1529.58  | 38    |
| H15B | 3906.65 | 4606.96 | 1832.68  | 38    |
| H15C | 3740.81 | 4800.04 | 1612.3   | 38    |
| H15D | 5055.87 | 4205.57 | 1771.37  | 38    |
| H6   | 4182.43 | 3785.57 | 4909.17  | 44    |
| H13A | 859.72  | 3375.34 | 2276.29  | 61    |
| H13B | 1177.05 | 2825.32 | 1295.99  | 61    |
| H13C | 1780.18 | 4013.47 | 1583.41  | 61    |
| H10  | 1820.63 | 1158.92 | 5353.68  | 44    |
| H21  | 3019.46 | 614.43  | -1154.09 | 52    |
| H7   | 4503.79 | 3941.53 | 6502.36  | 55    |
| H9   | 2131.91 | 1347.43 | 6937.88  | 58    |
| H8   | 3462.44 | 2731.71 | 7506.29  | 61    |
| H12A | 5930.71 | 1877.82 | 813.96   | 82    |
| H12B | 5175.79 | 711.95  | 873.9    | 82    |
| H12C | 6334.89 | 926.93  | 1541.03  | 82    |
| H16A | 3620.13 | 5716.93 | 560.48   | 38    |
| H16B | 4993.97 | 6016.33 | 904.56   | 38    |
| H17A | 4994.86 | 5740.26 | -709.21  | 39    |
| H17B | 5845.62 | 4797.65 | -225.72  | 39    |
| H17C | 4666.21 | 5848.58 | -672.1   | 36    |
| H17D | 3420    | 5567.25 | -112.98  | 36    |
| H16C | 5858.99 | 4935.83 | 480.05   | 43    |
| H16D | 5079.37 | 5960.44 | 913.46   | 43    |

**Table 8** Atomic Occupancy for 240514lty.

| Atom | Occupancy | Atom | Occupancy | Atom | Occupancy |
|------|-----------|------|-----------|------|-----------|
| H18A | 0.625(8)  | H18B | 0.625(8)  | H18C | 0.375(8)  |
| H18D | 0.375(8)  | H15A | 0.625(8)  | H15B | 0.625(8)  |
| H15C | 0.375(8)  | H15D | 0.375(8)  | C16  | 0.625(8)  |
| H16A | 0.625(8)  | H16B | 0.625(8)  | C17  | 0.625(8)  |
| H17A | 0.625(8)  | H17B | 0.625(8)  | C17A | 0.375(8)  |
| H17C | 0.375(8)  | H17D | 0.375(8)  | C16A | 0.375(8)  |
| H16C | 0.375(8)  | H16D | 0.375(8)  |      |           |

## 8. $^1\text{H}$ , $^{13}\text{C}$ and $^{19}\text{F}$ NMR Spectra for New Compounds

### $^1\text{H}$ and $^{13}\text{C}$ NMR (DMSO- $d_6$ ) Spectra for Compound **2f**

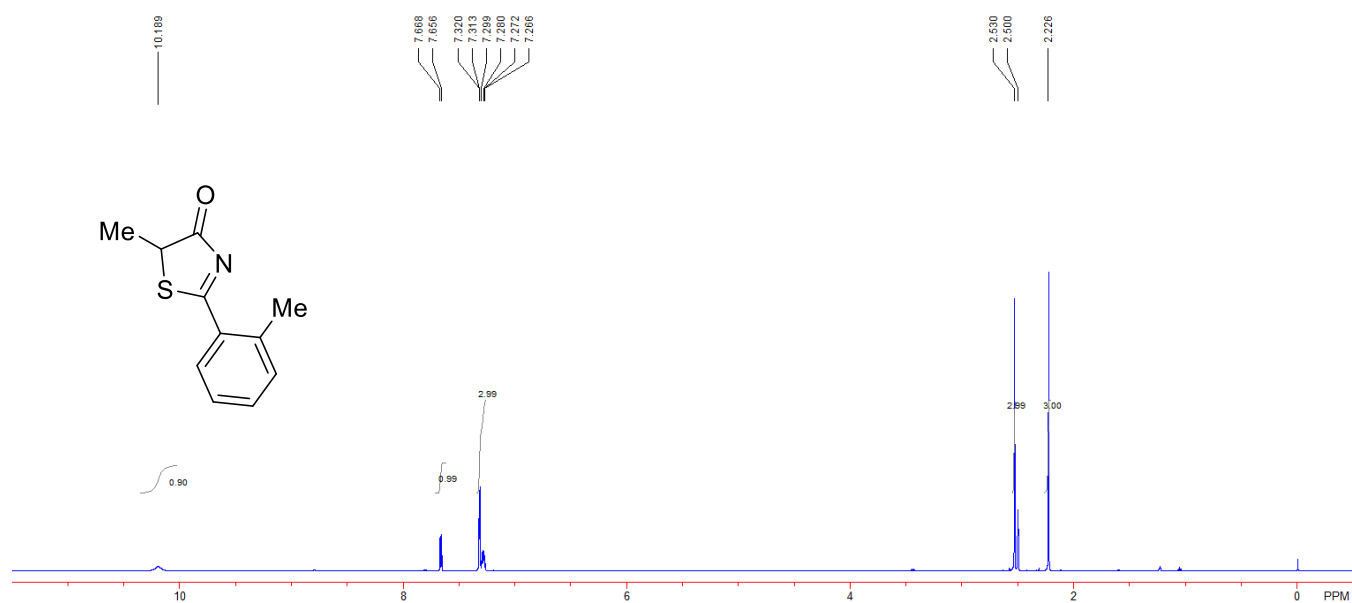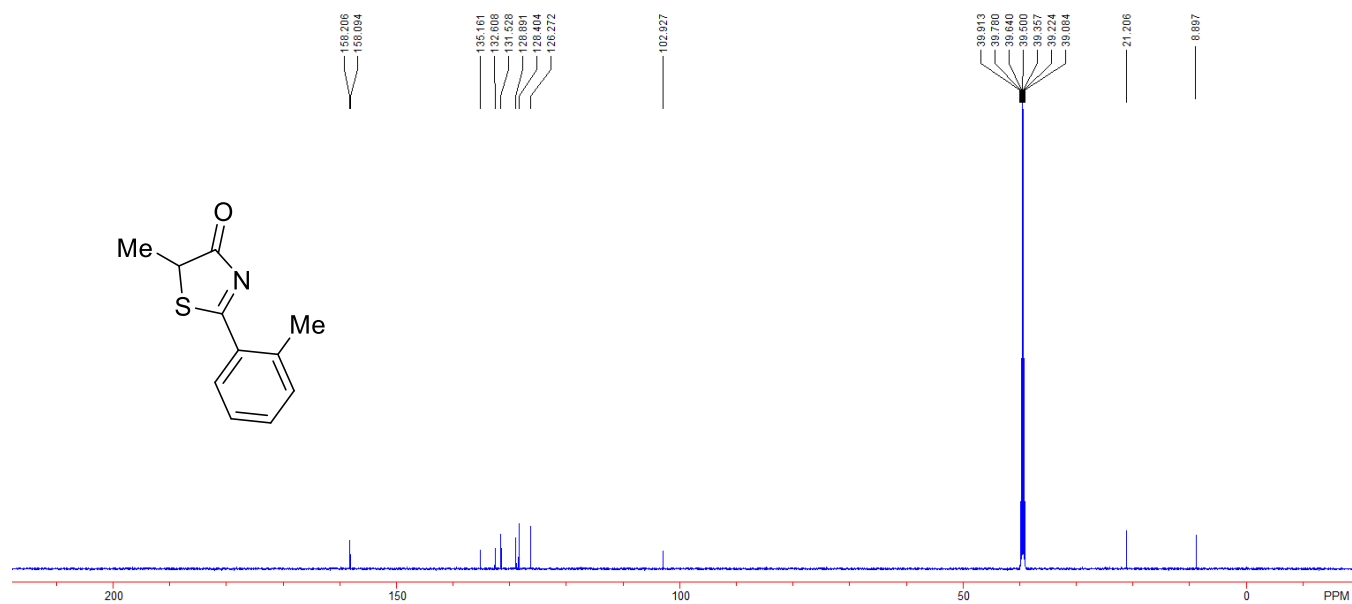

# $^1\text{H}$ and $^{13}\text{C}$ NMR ( $\text{CDCl}_3$ ) Spectra for Compound **3a**

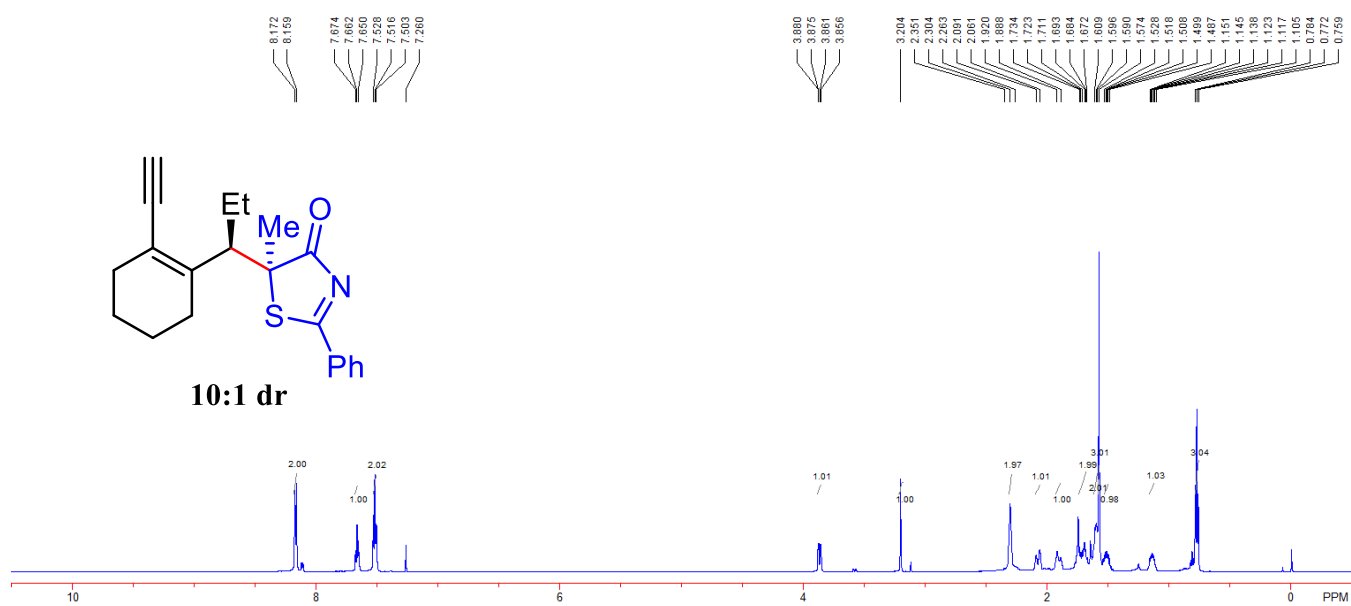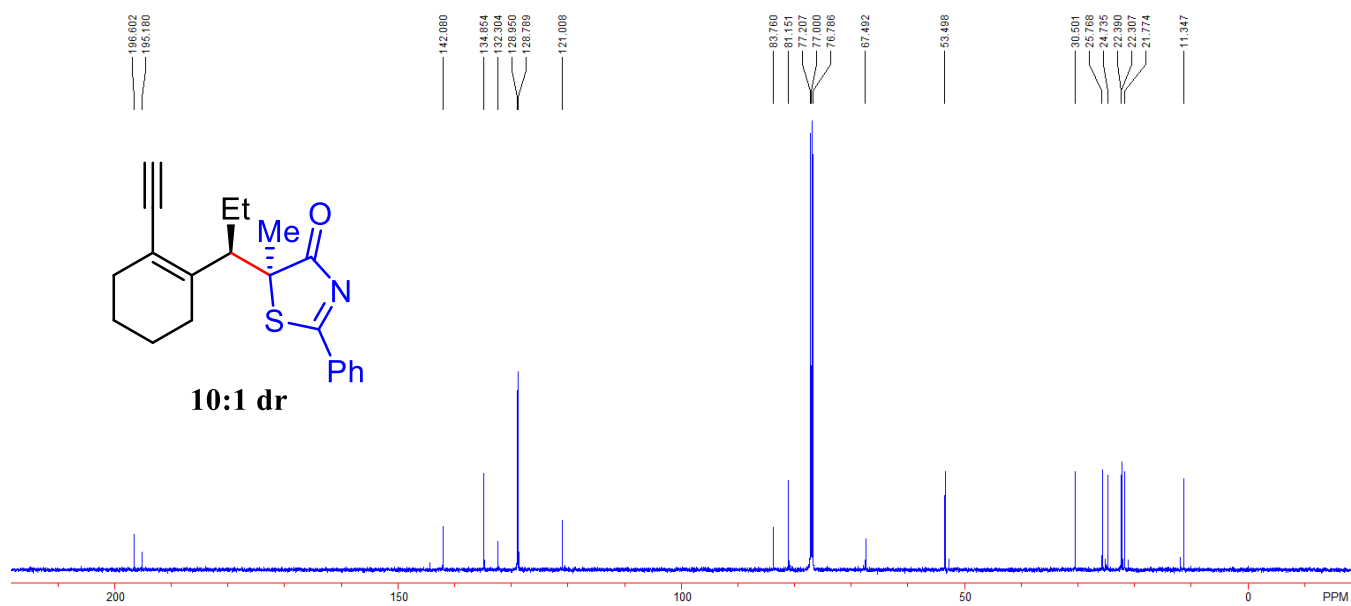

# $^1\text{H}$ and $^{13}\text{C}$ NMR ( $\text{CDCl}_3$ ) Spectra for Compound **3b**

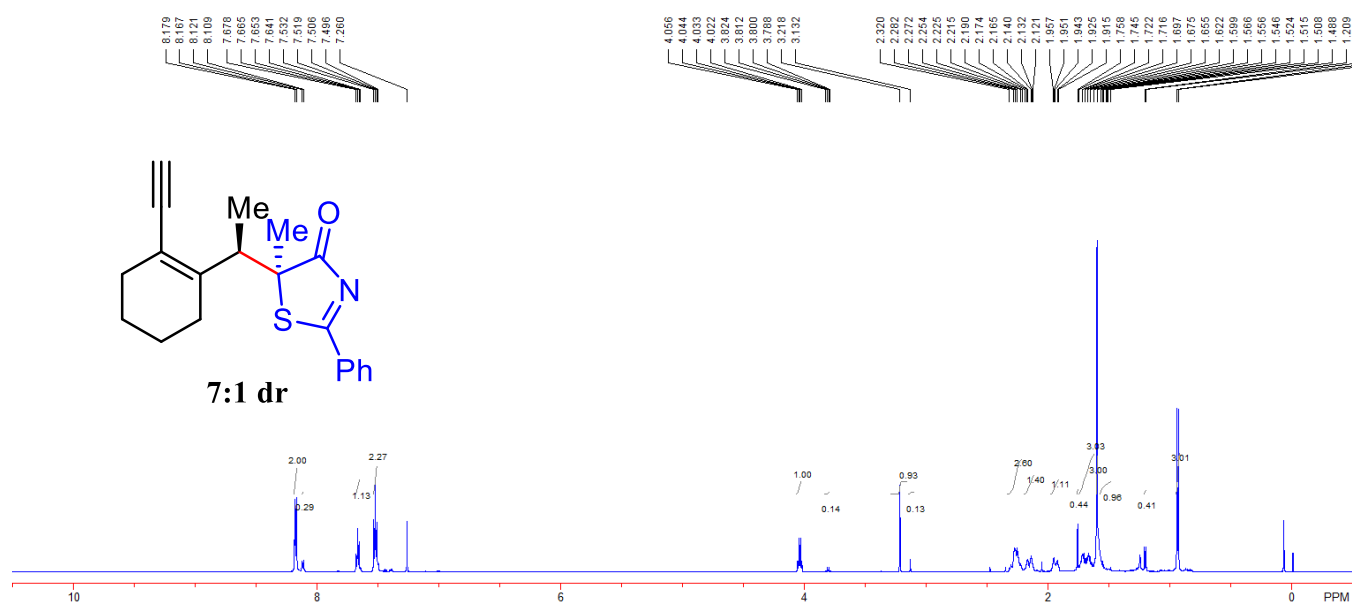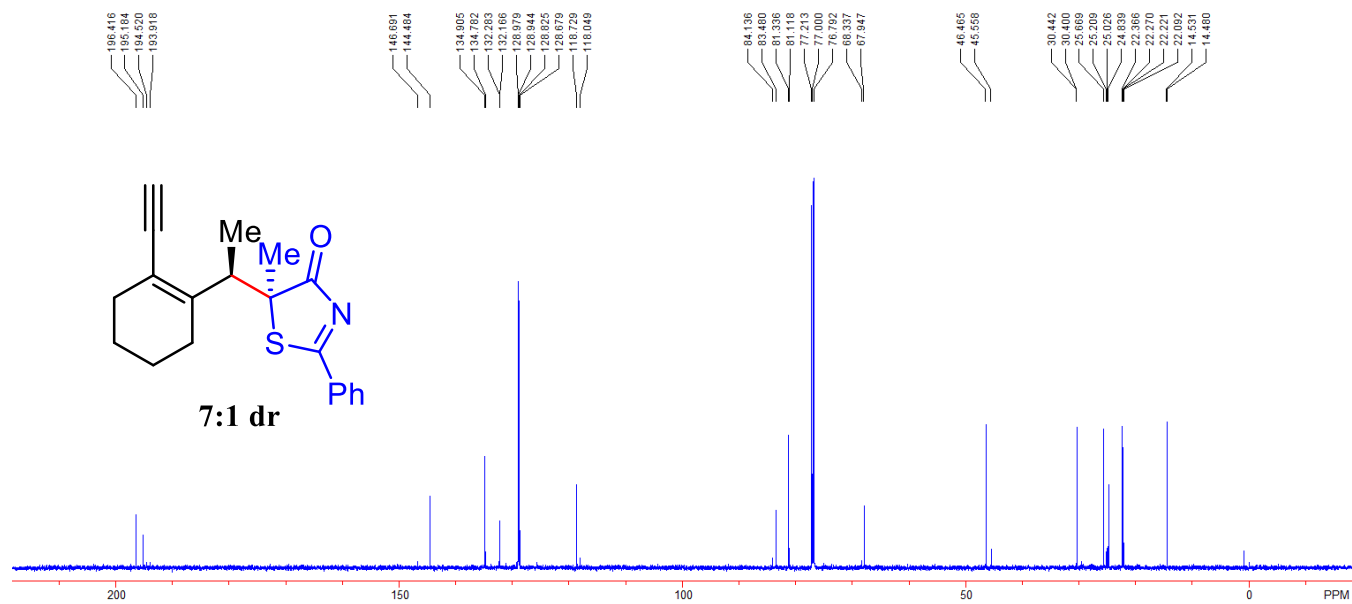



# $^1\text{H}$ and $^{13}\text{C}$ NMR ( $\text{CDCl}_3$ ) Spectra for Compound **3c**

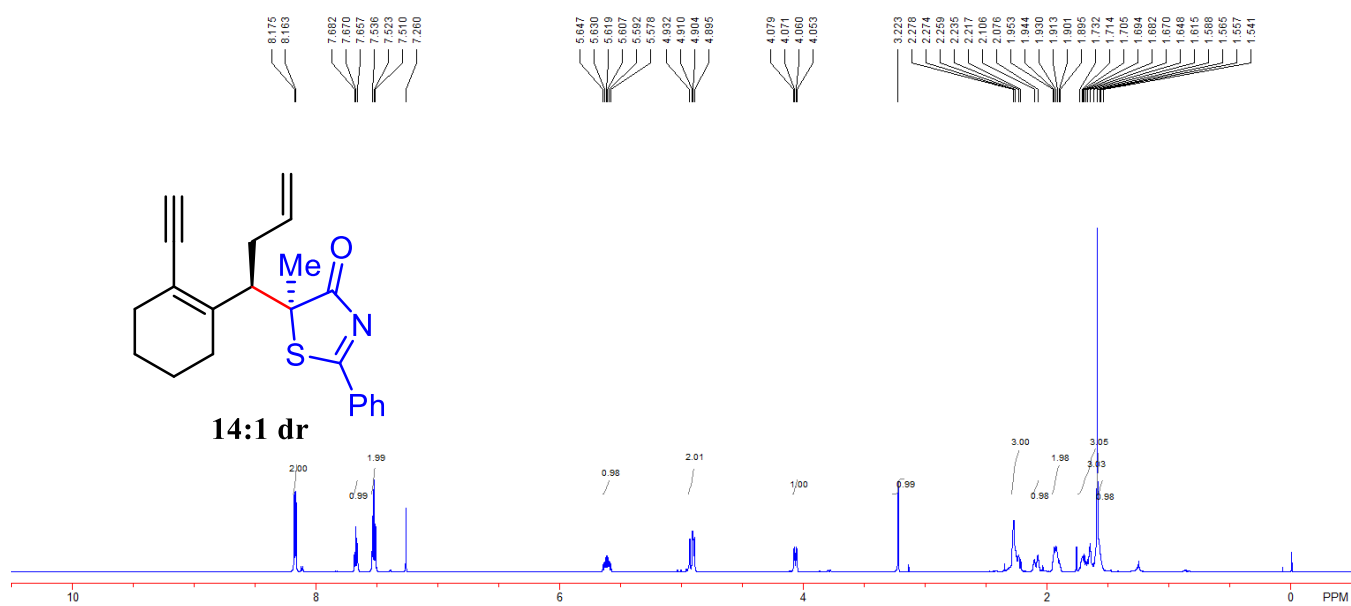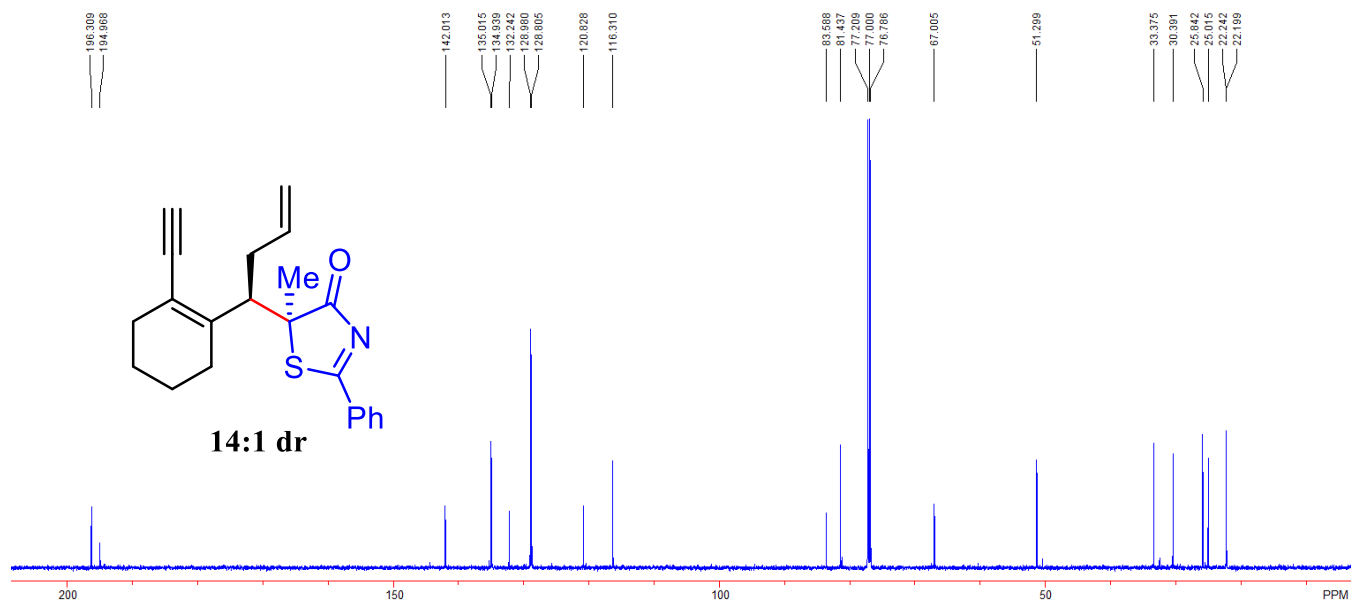

# $^1\text{H}$ and $^{13}\text{C}$ NMR ( $\text{CDCl}_3$ ) Spectra for Compound **3d**

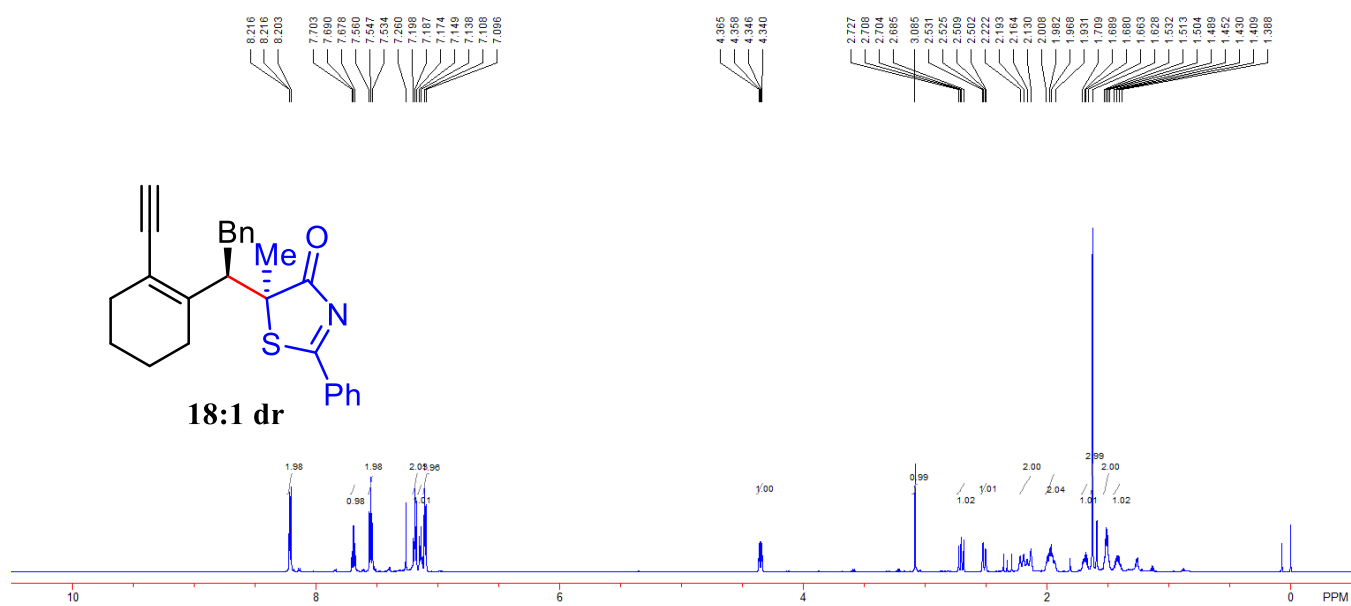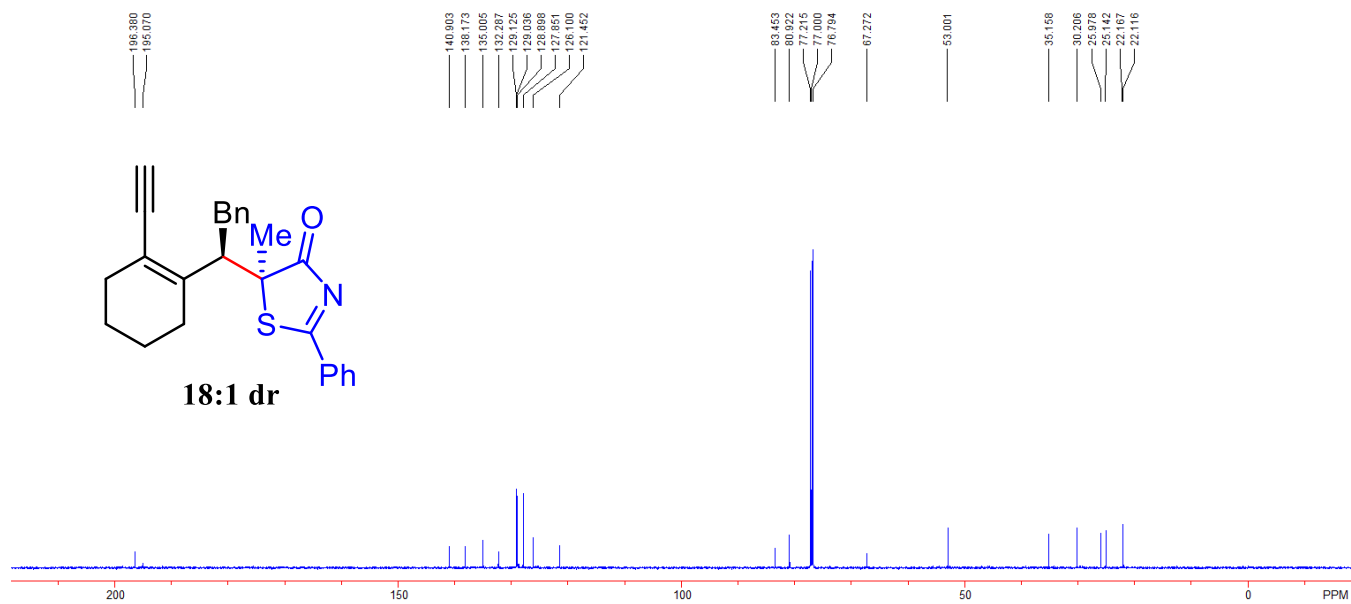

# $^1\text{H}$ and $^{13}\text{C}$ NMR ( $\text{CDCl}_3$ ) Spectra for Compound **3e**

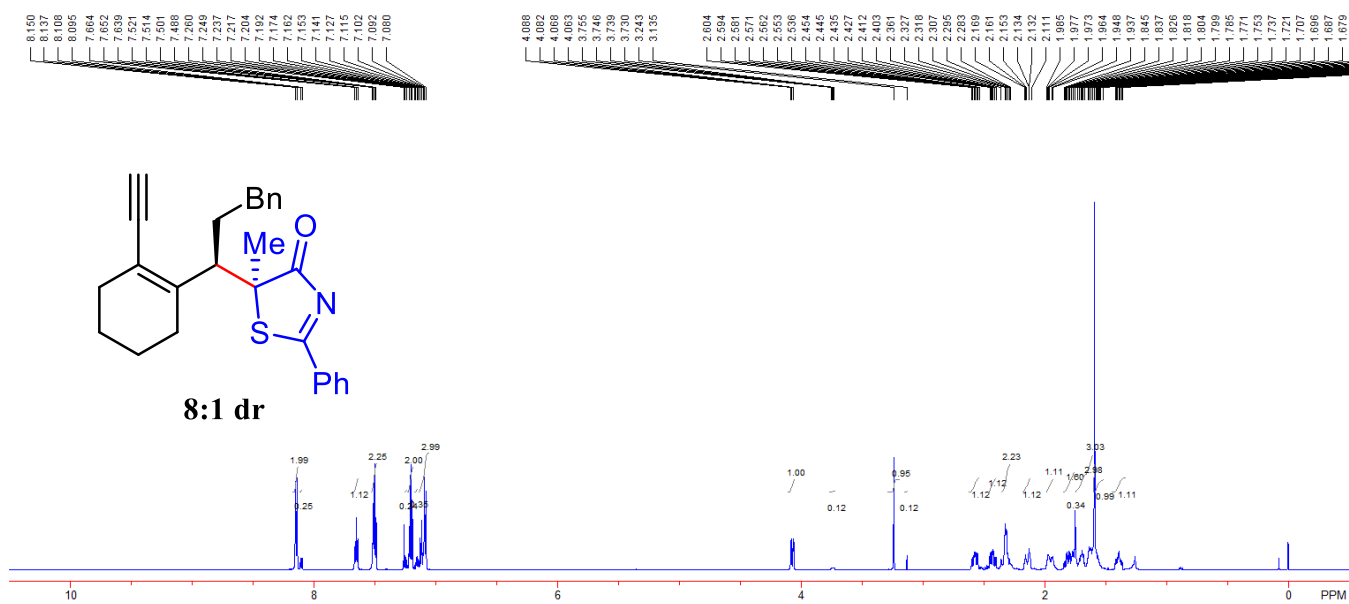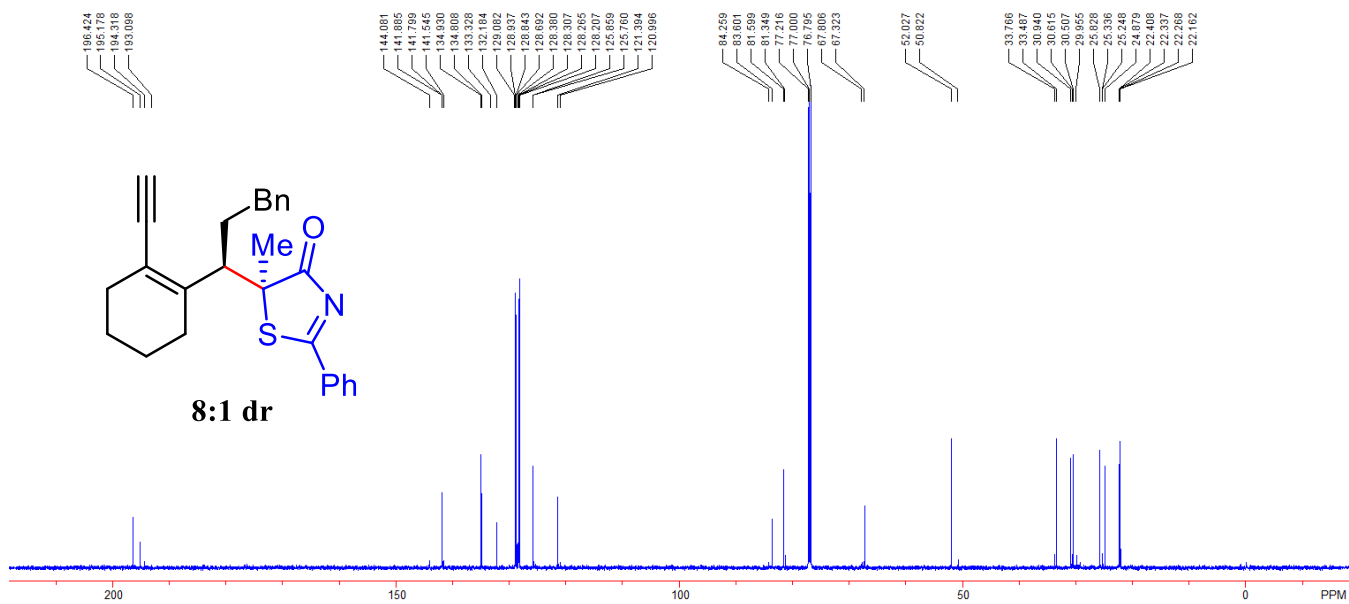

# $^1\text{H}$ and $^{13}\text{C}$ NMR ( $\text{CDCl}_3$ ) Spectra for Compound **3f**

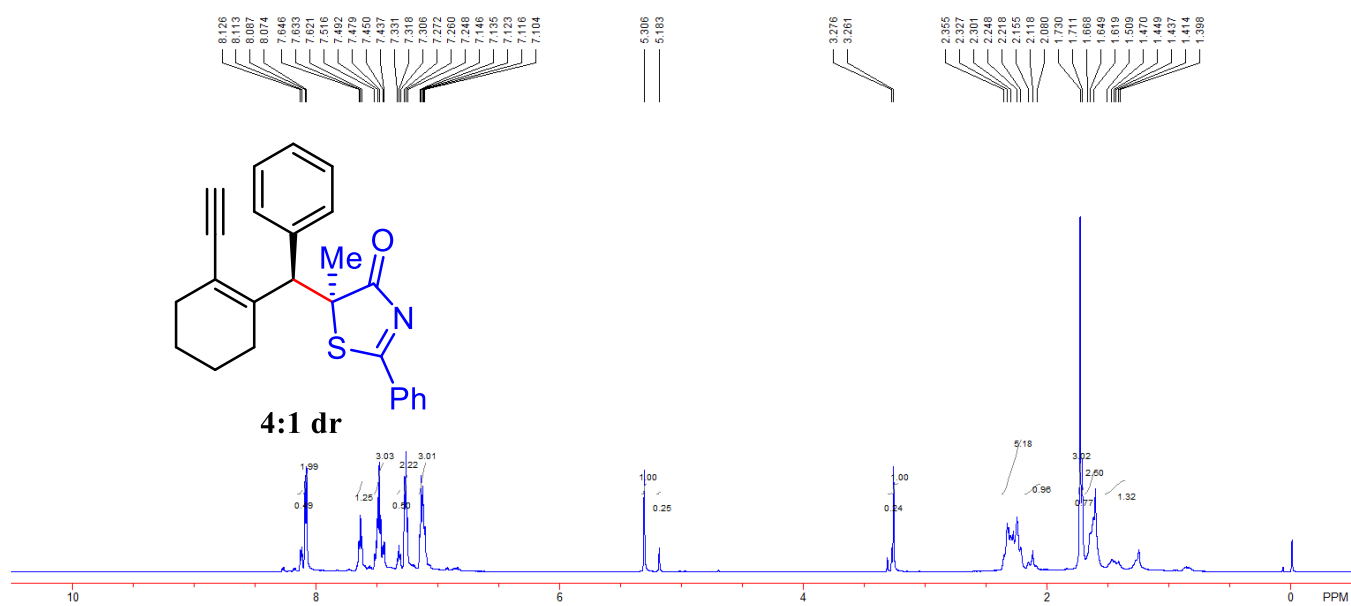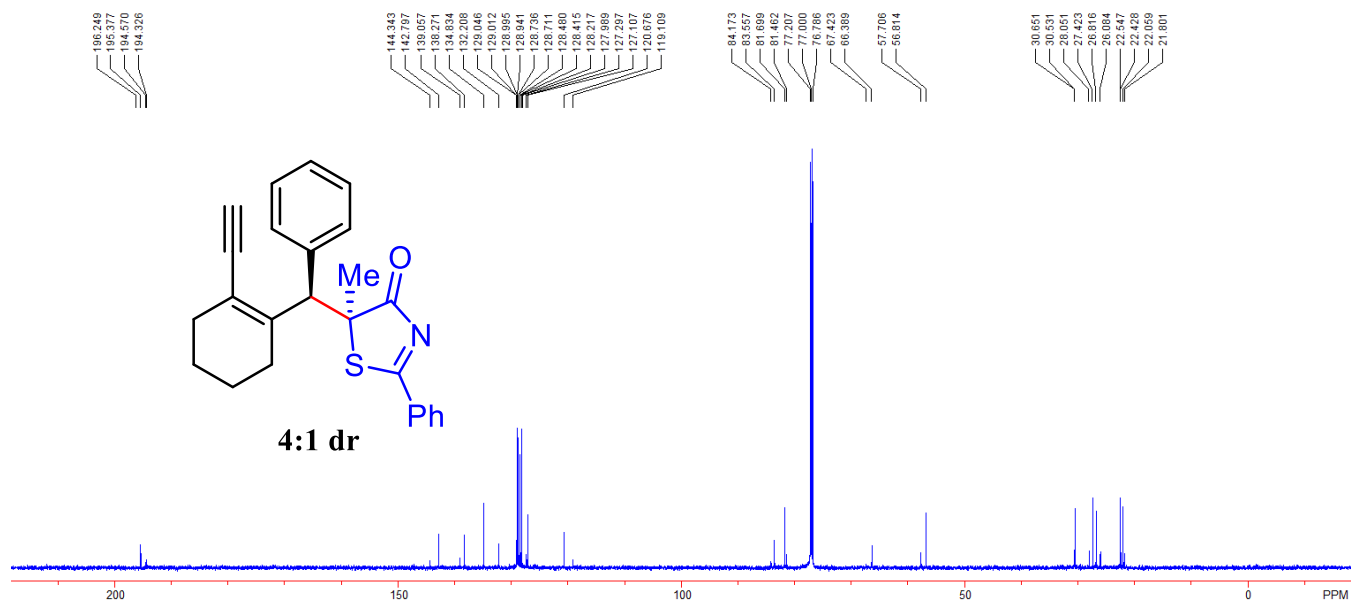

# $^1\text{H}$ and $^{13}\text{C}$ NMR ( $\text{CDCl}_3$ ) Spectra for Compound **3g**

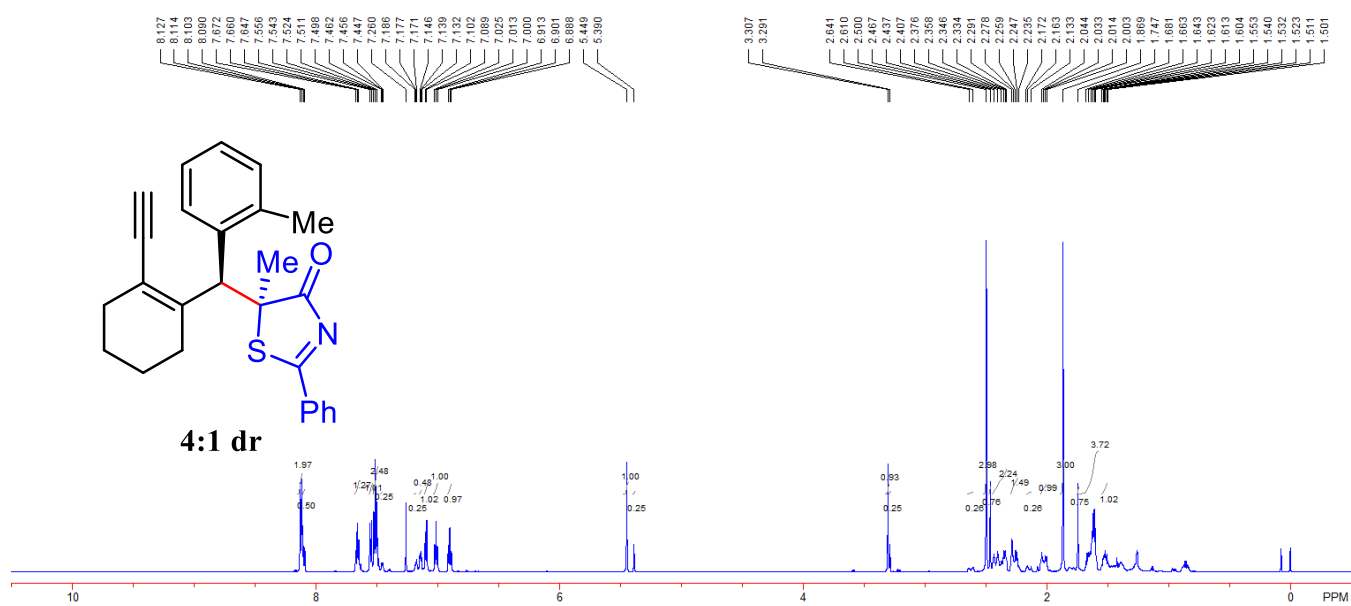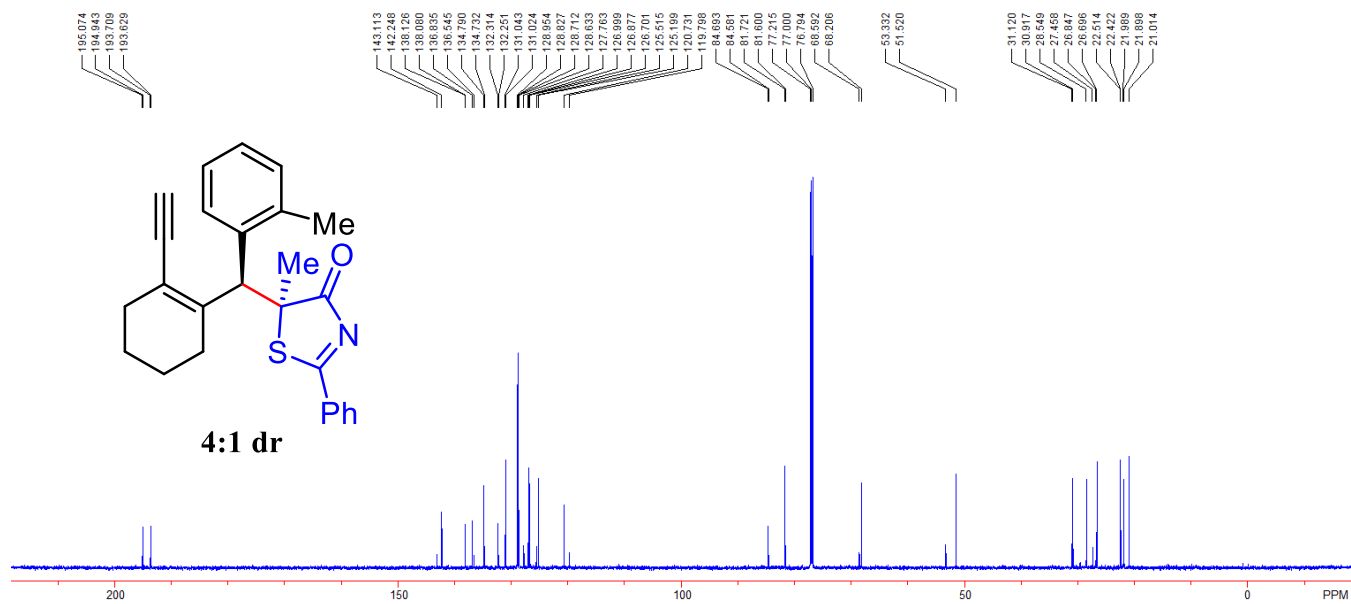

# $^1\text{H}$ and $^{13}\text{C}$ NMR ( $\text{CDCl}_3$ ) Spectra for Compound **3h**

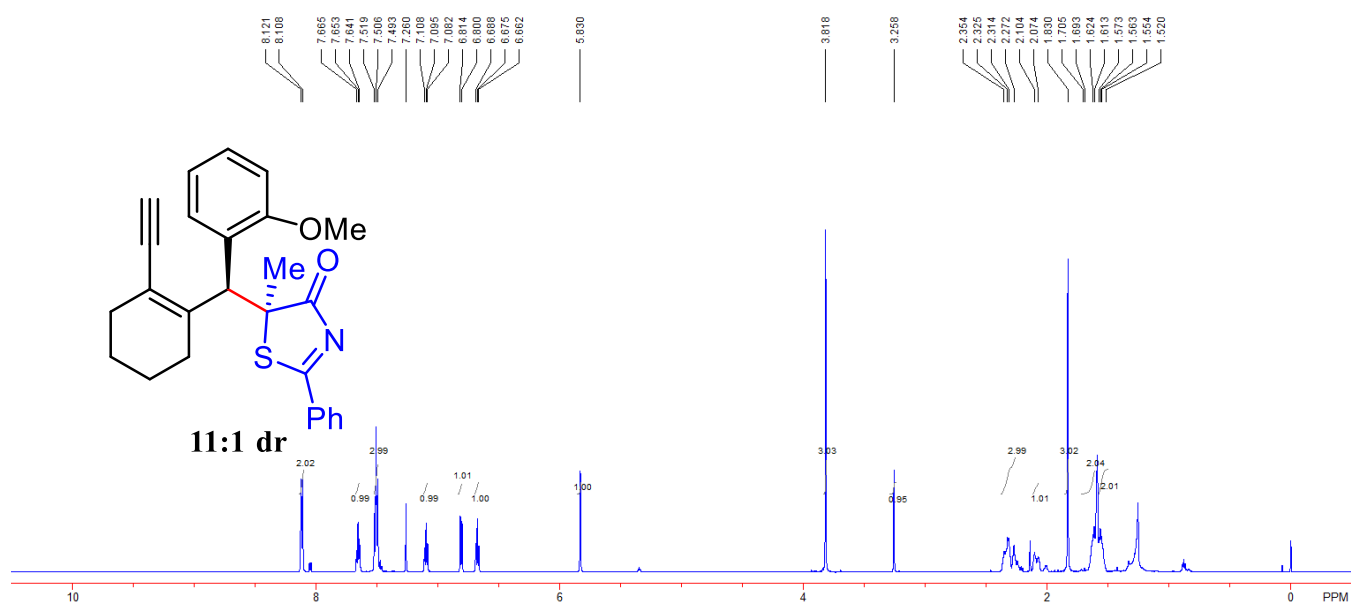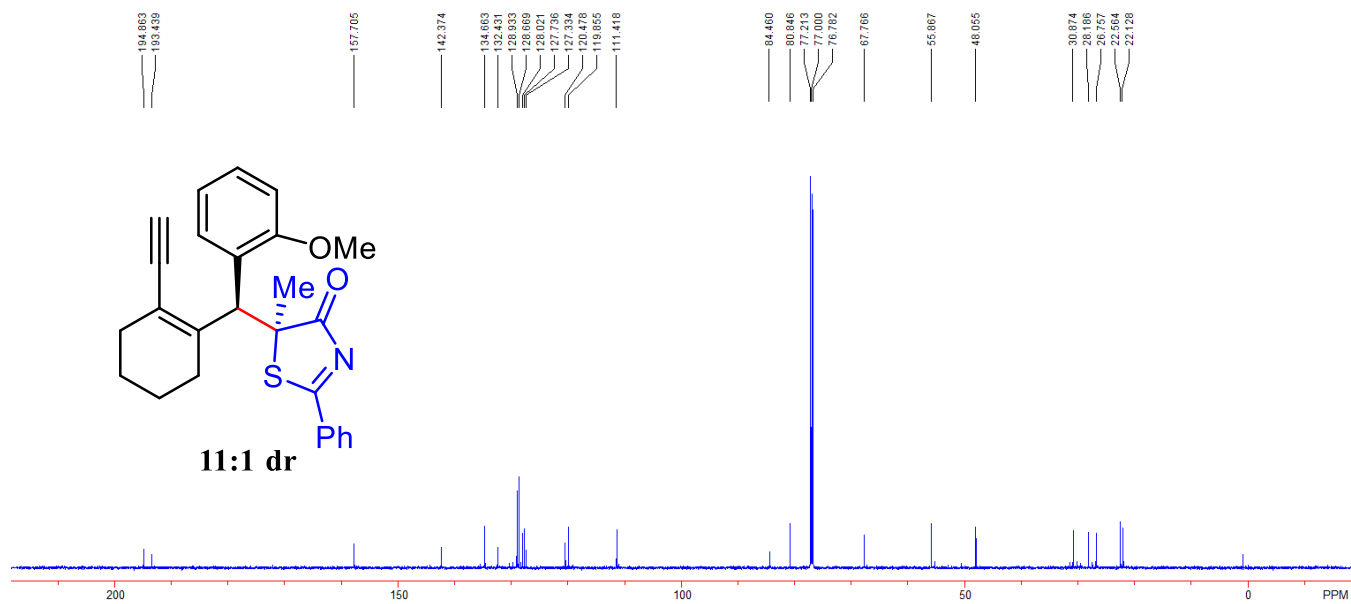

# $^1\text{H}$ and $^{13}\text{C}$ NMR ( $\text{CDCl}_3$ ) Spectra for Compound **3i**

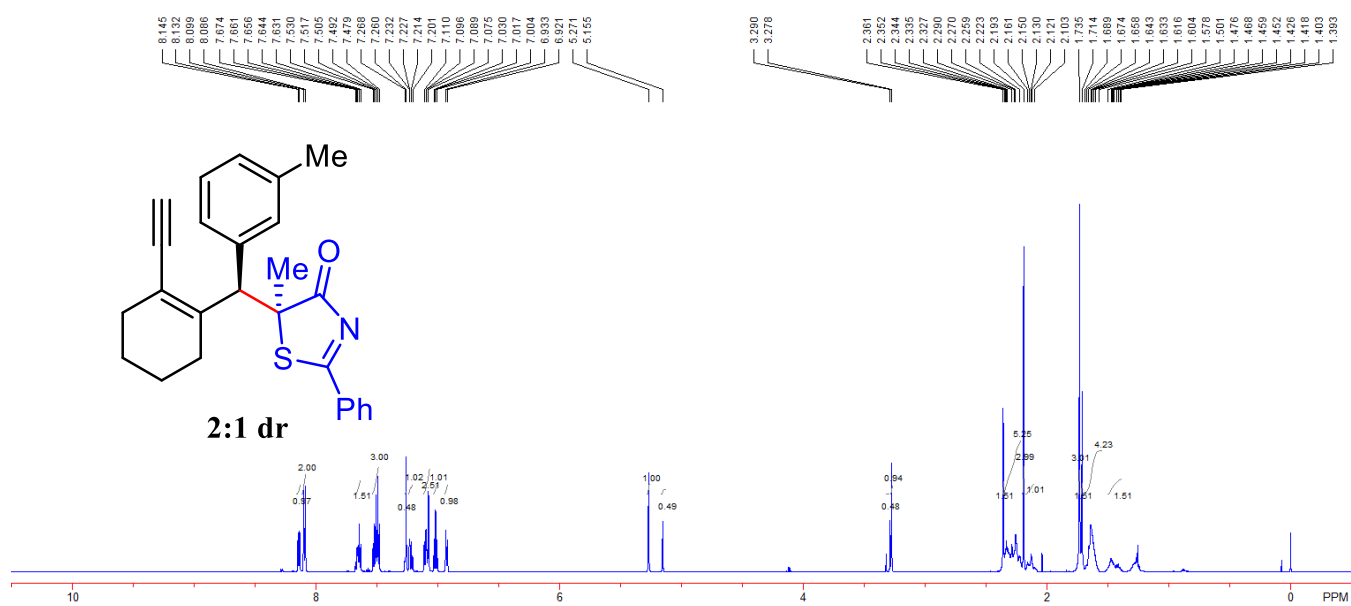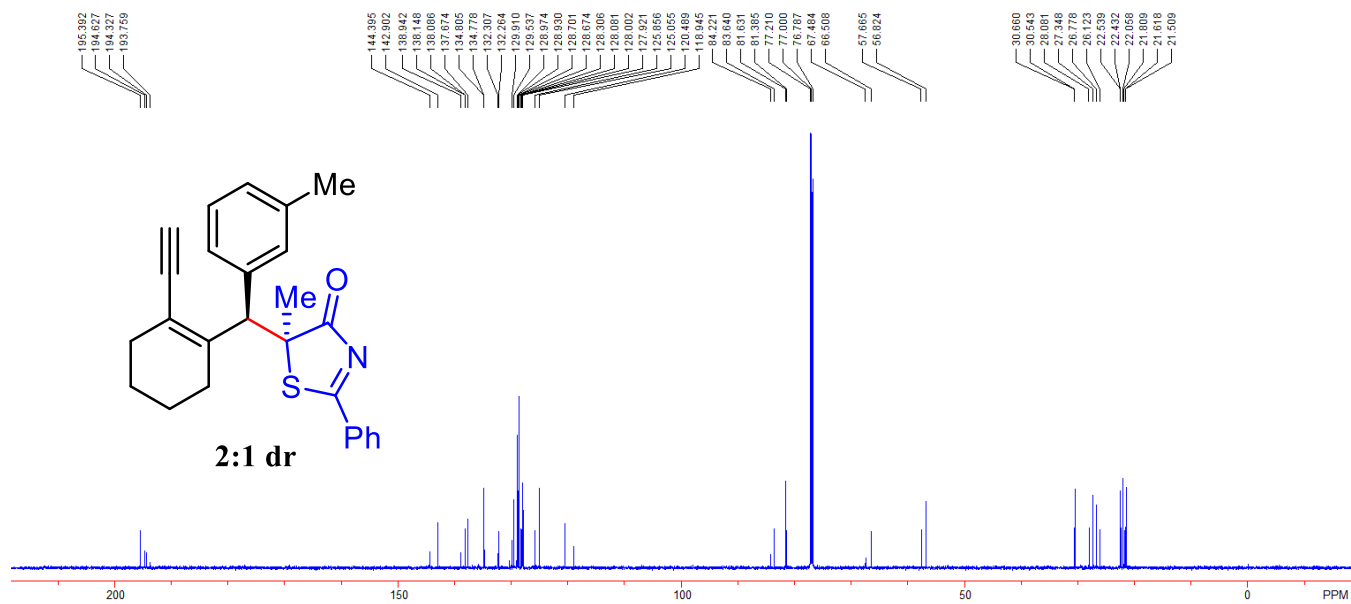

# $^1\text{H}$ and $^{13}\text{C}$ NMR ( $\text{CDCl}_3$ ) Spectra for Compound **3j**

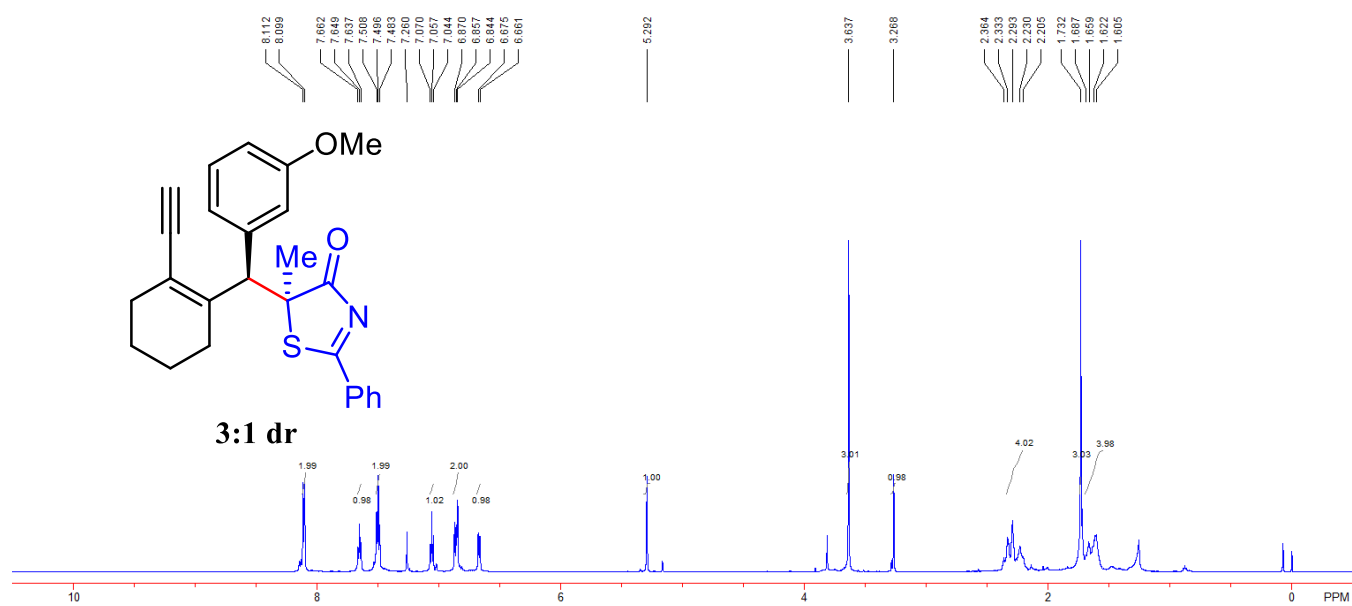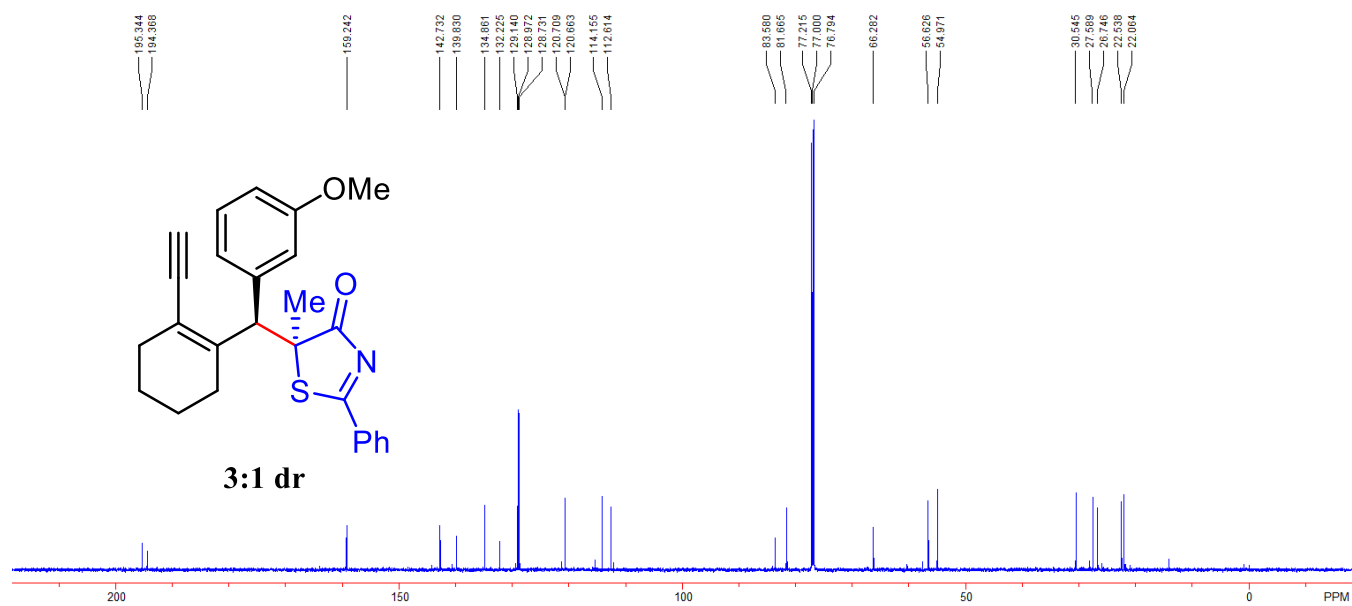



# $^1\text{H}$ , $^{13}\text{C}$ and $^{19}\text{F}$ NMR ( $\text{CDCl}_3$ ) Spectra for Compound **3k**

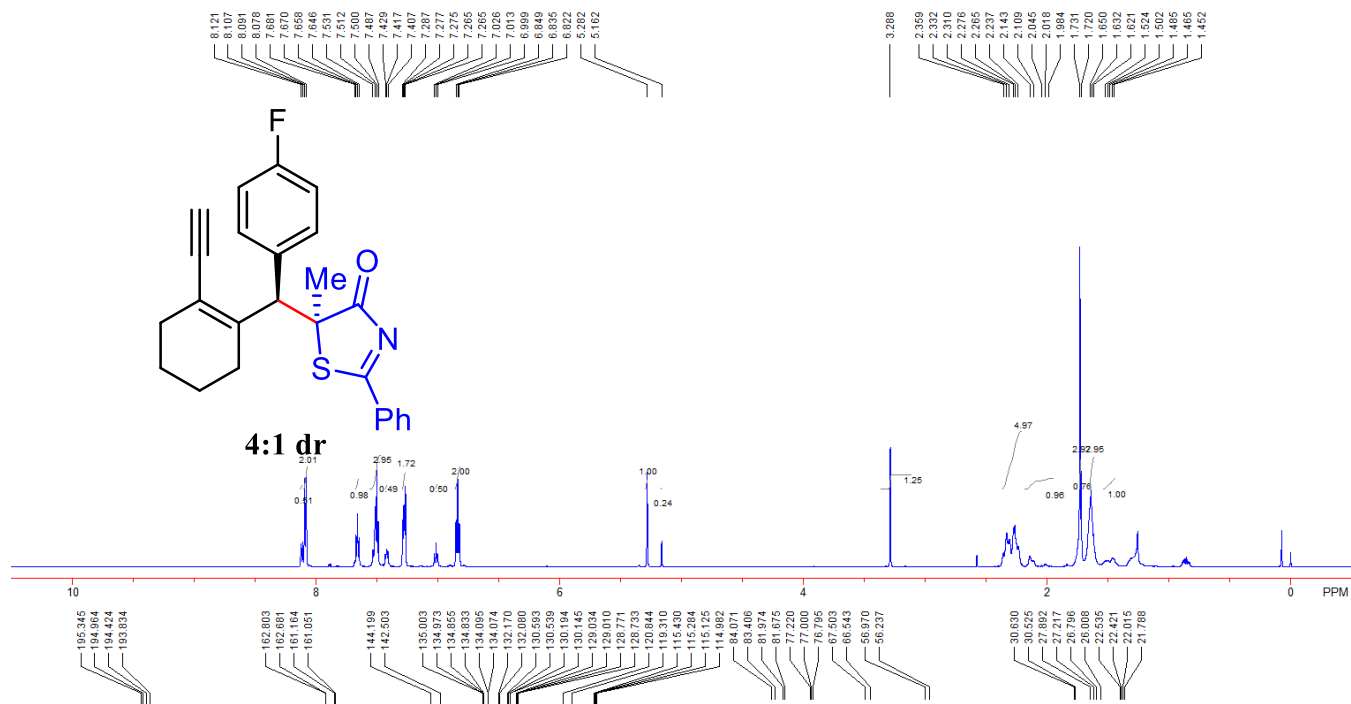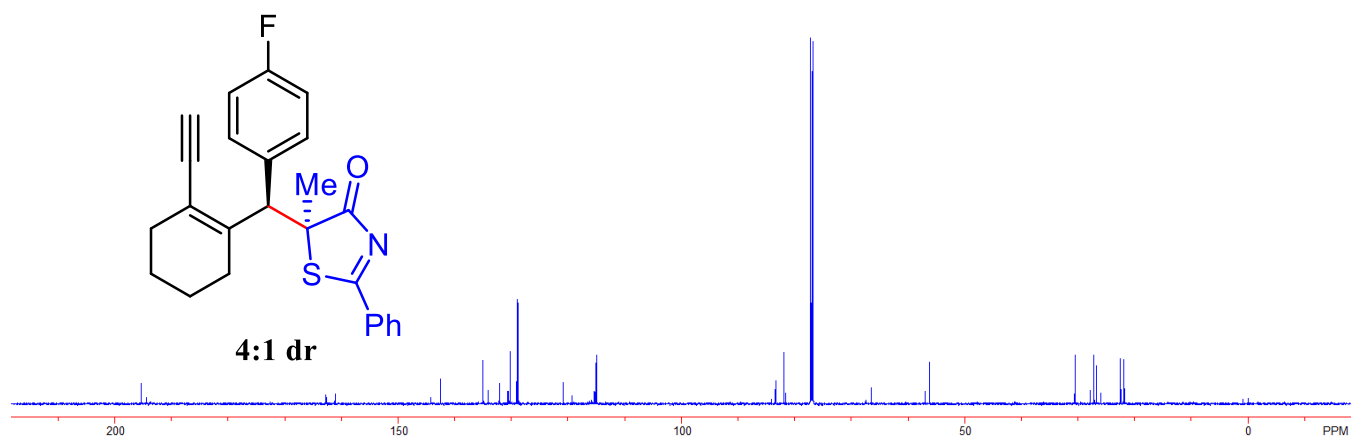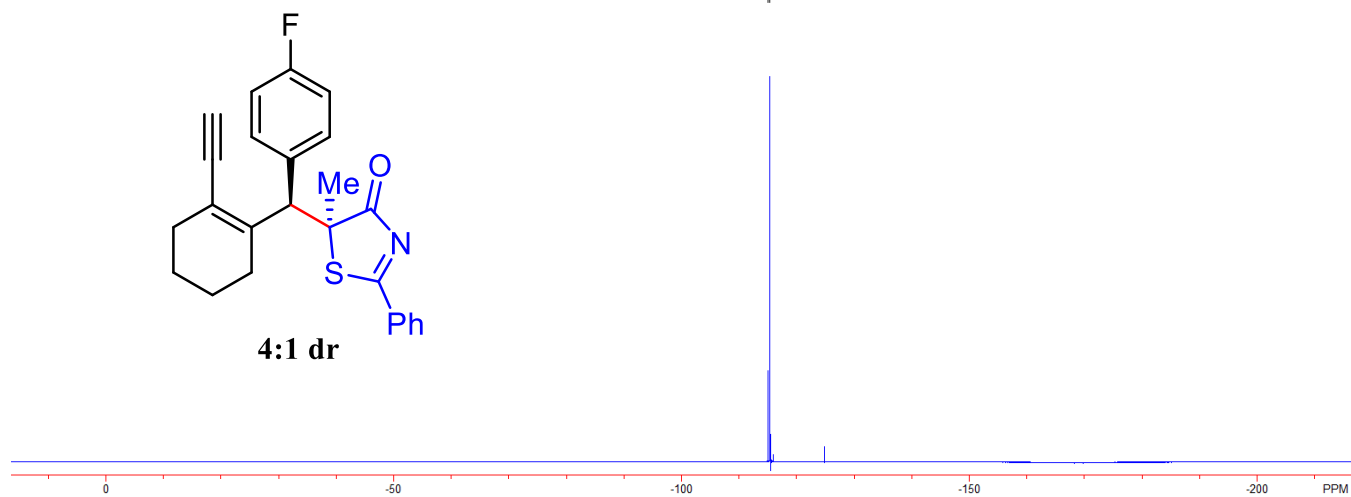

# $^1\text{H}$ and $^{13}\text{C}$ NMR ( $\text{CDCl}_3$ ) Spectra for Compound **3I**

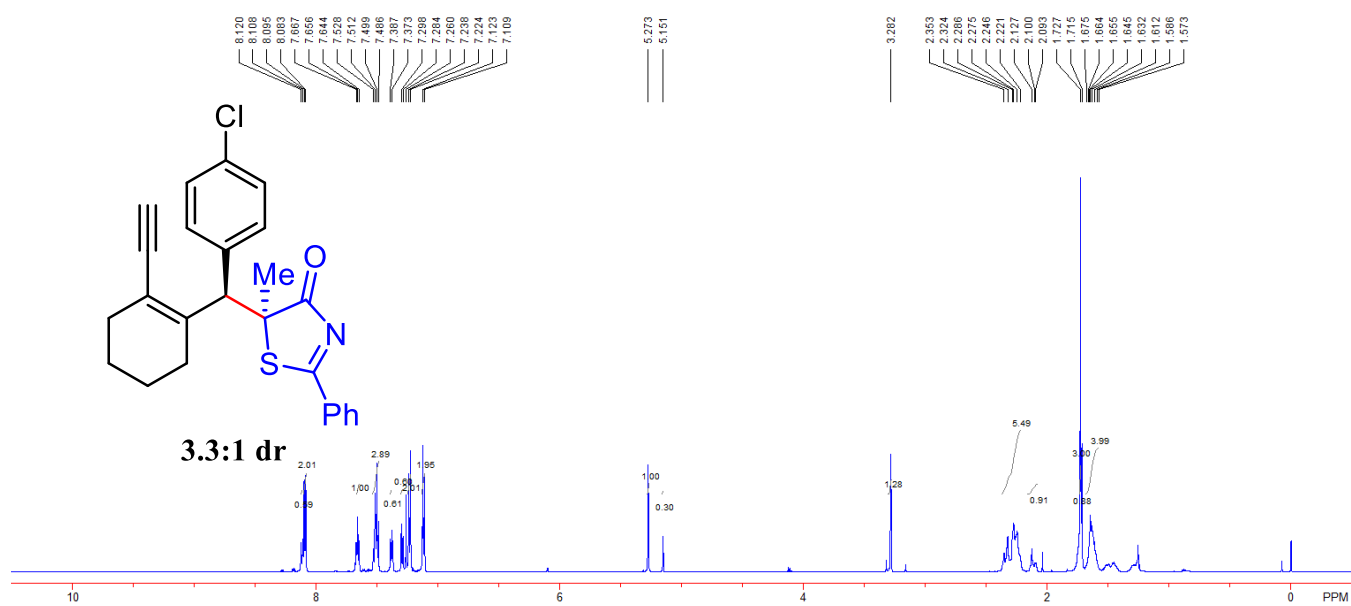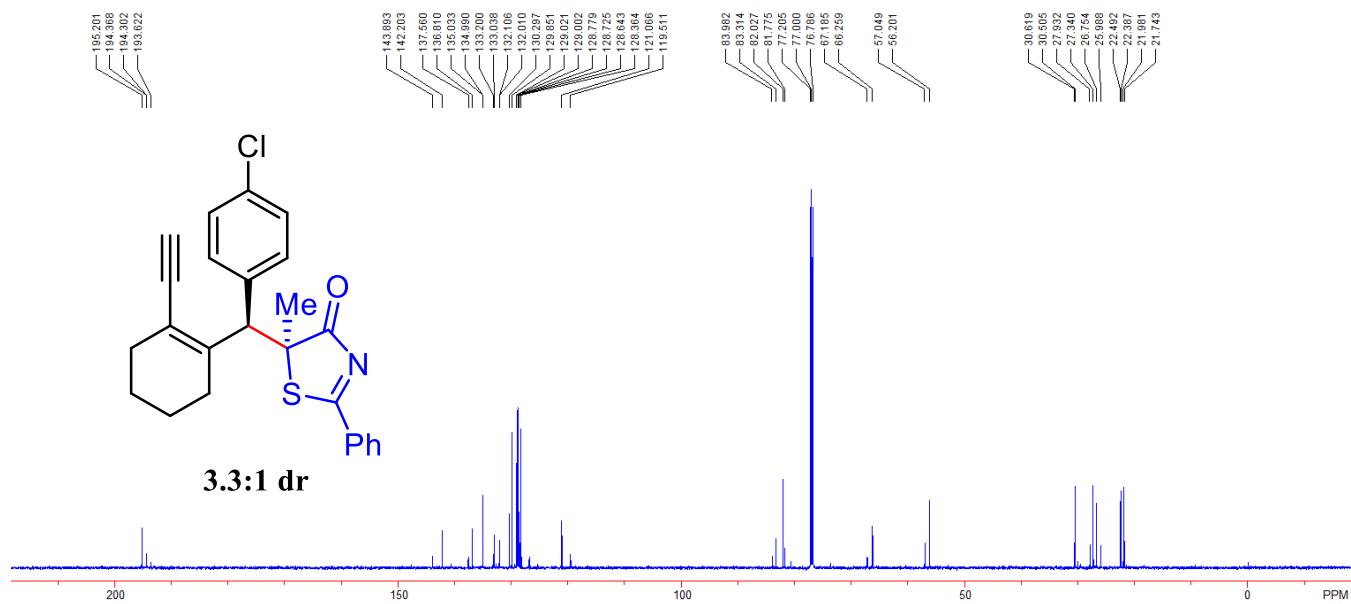

# $^1\text{H}$ , $^{13}\text{C}$ and $^{19}\text{F}$ NMR ( $\text{CDCl}_3$ ) Spectra for Compound **3m**

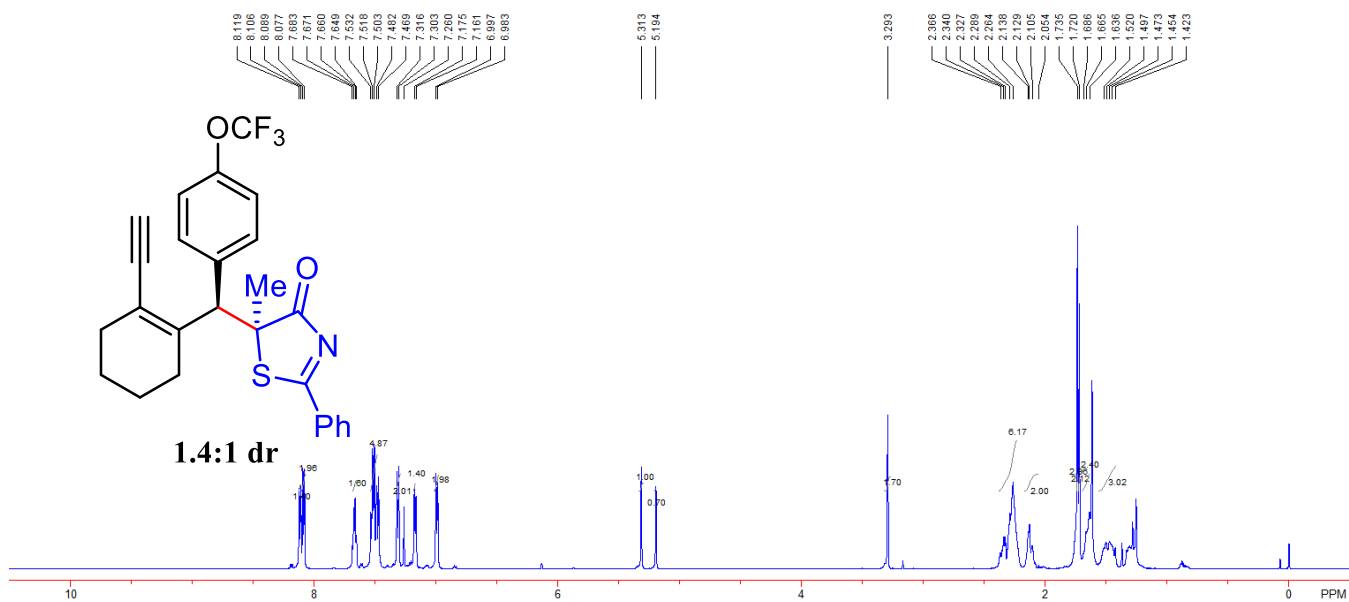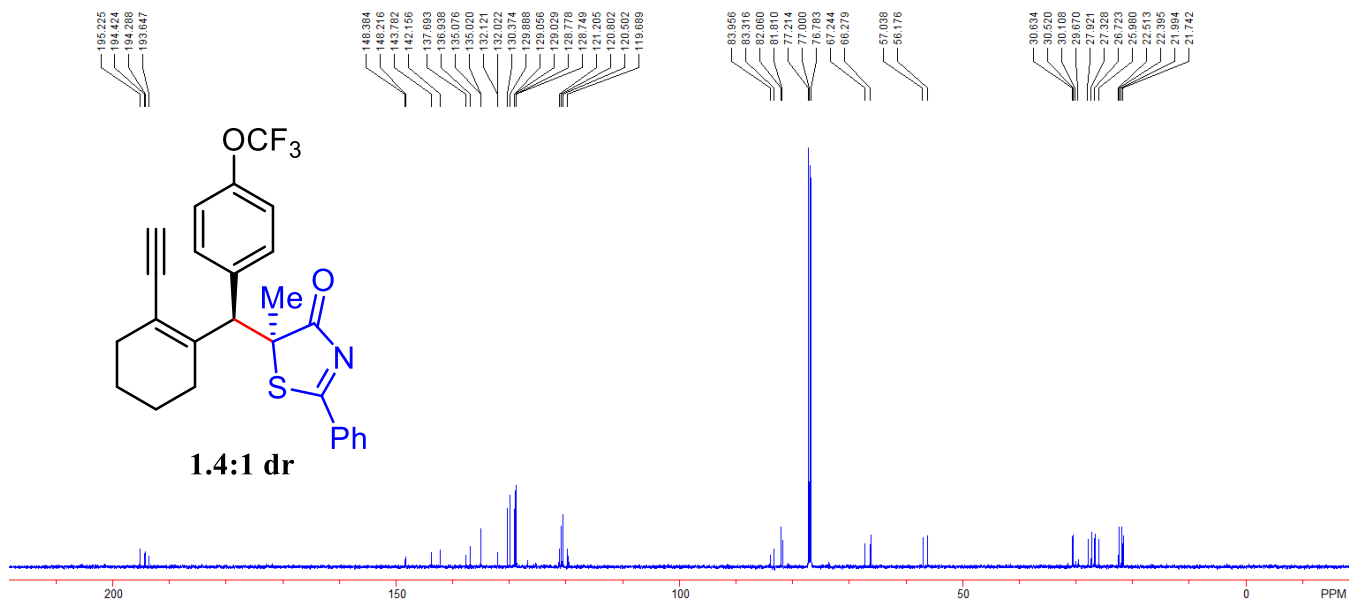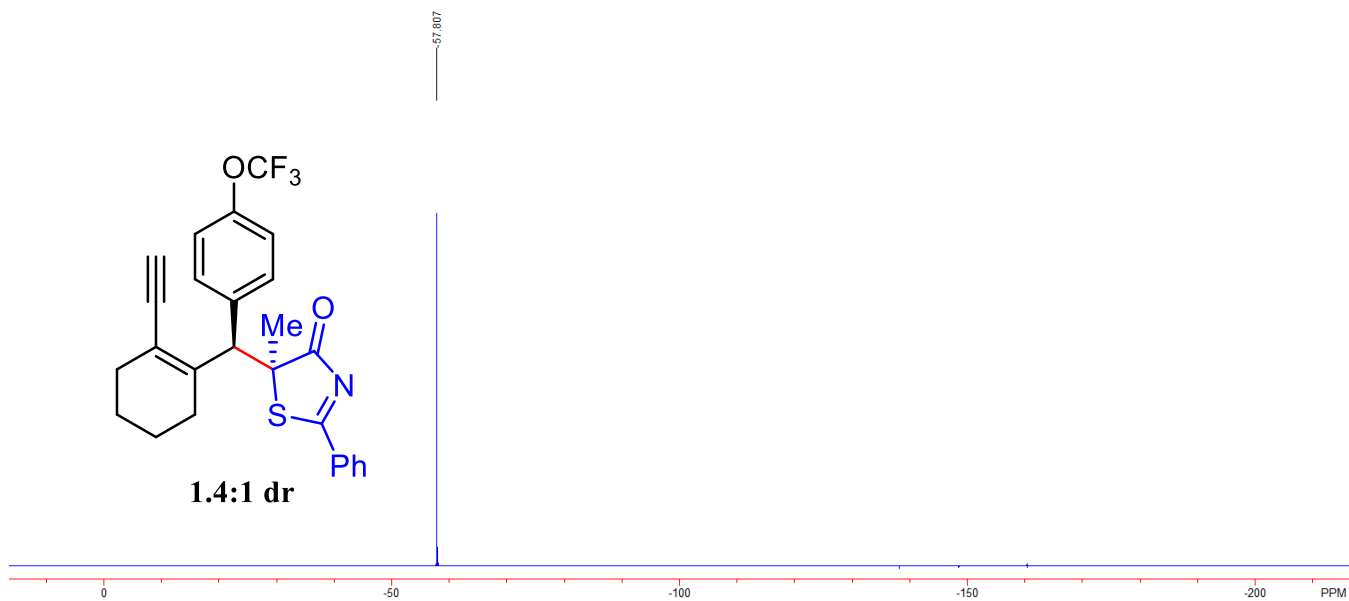

# $^1\text{H}$ and $^{13}\text{C}$ NMR ( $\text{CDCl}_3$ ) Spectra for Compound **3n**

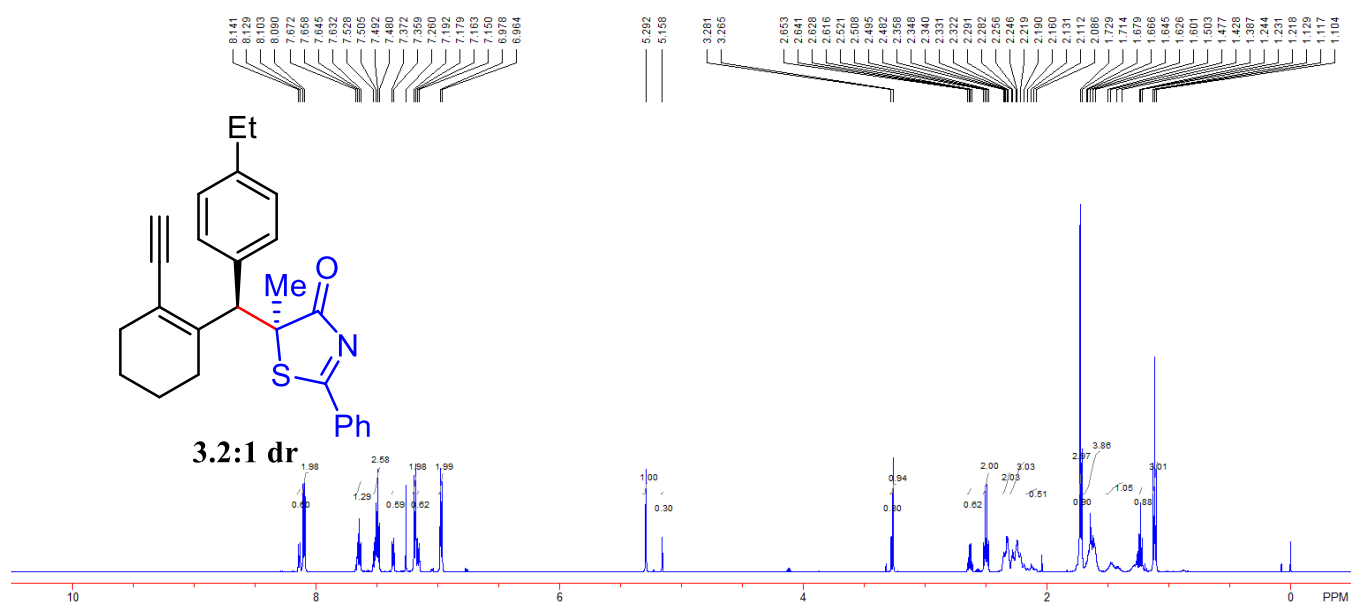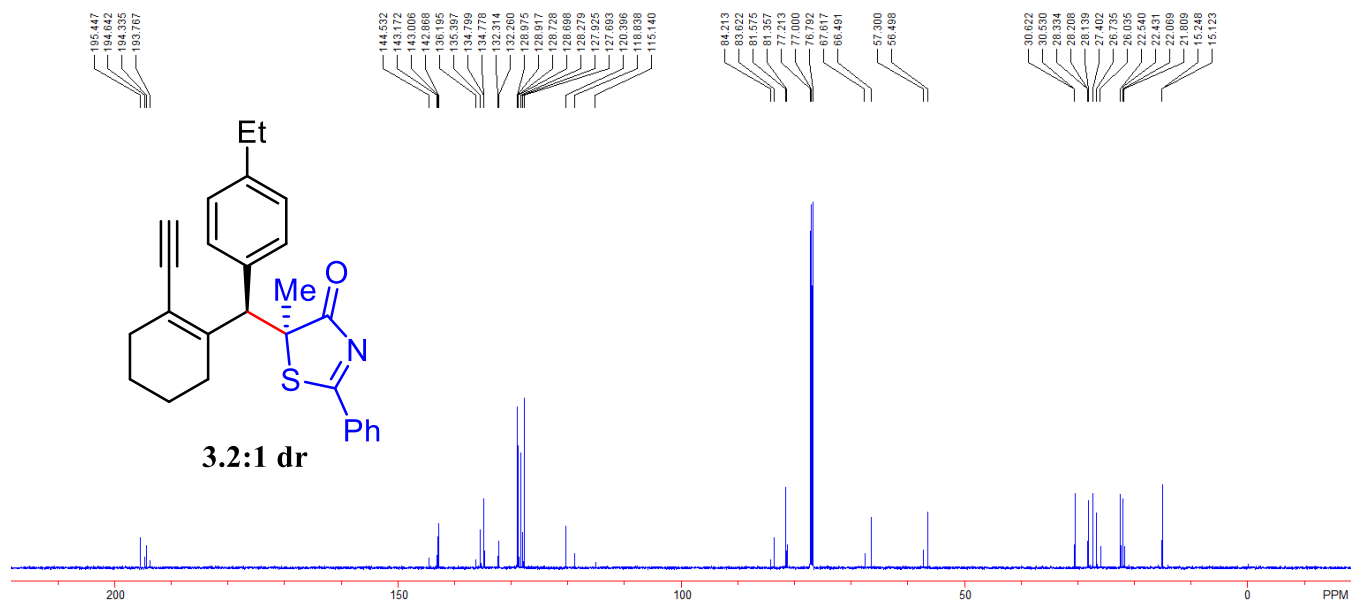

# $^1\text{H}$ and $^{13}\text{C}$ NMR ( $\text{CDCl}_3$ ) Spectra for Compound **3o**

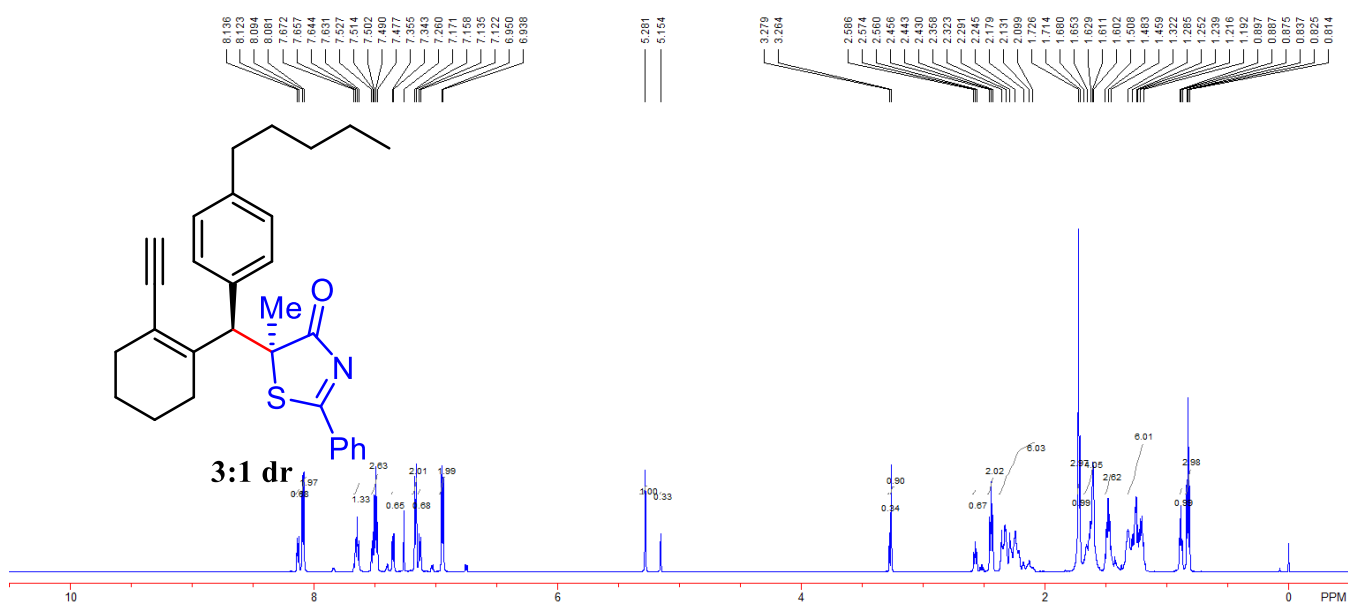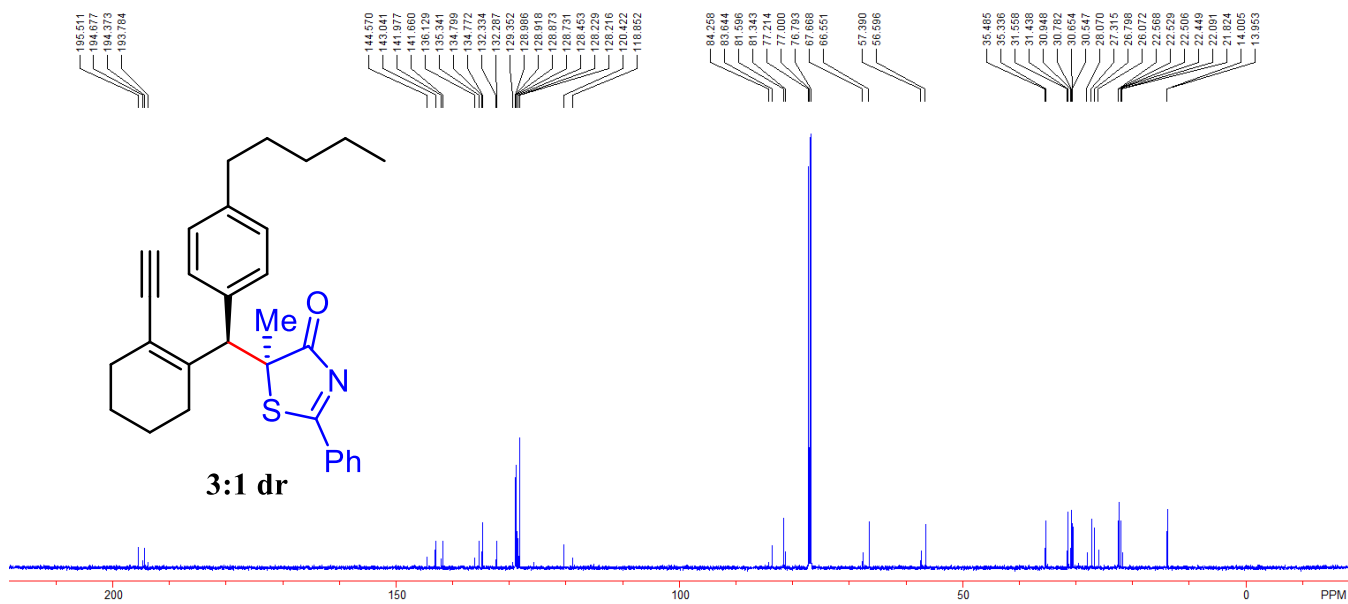

# $^1\text{H}$ and $^{13}\text{C}$ NMR ( $\text{CDCl}_3$ ) Spectra for Compound **3p**

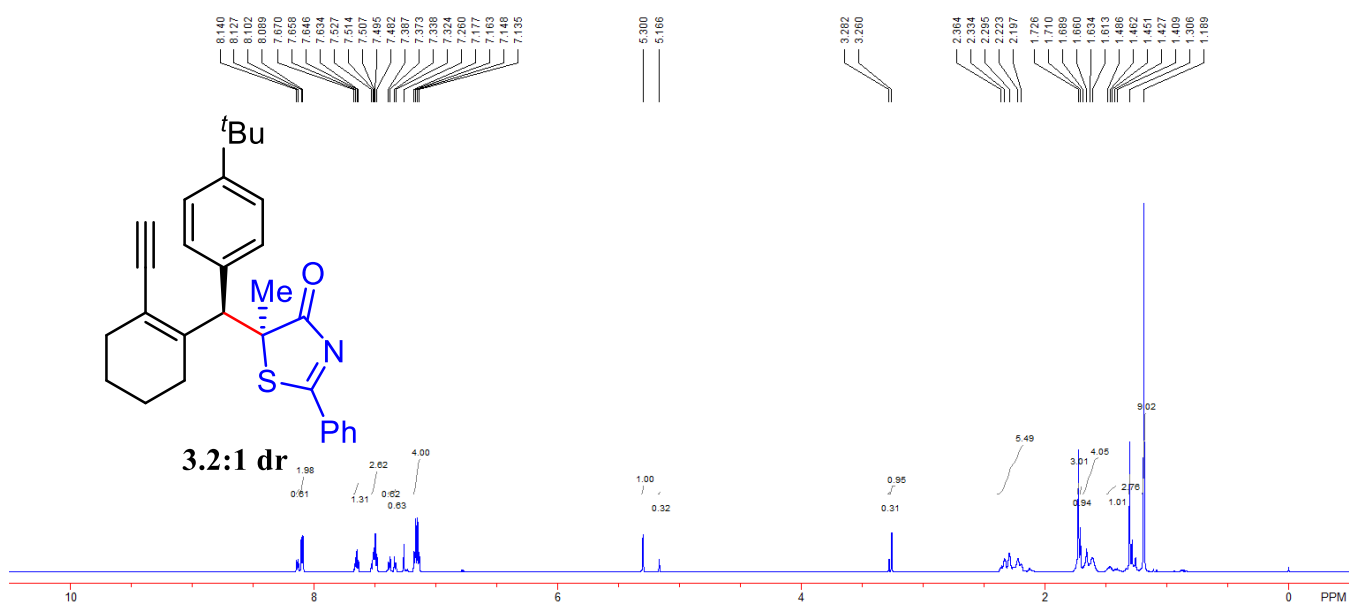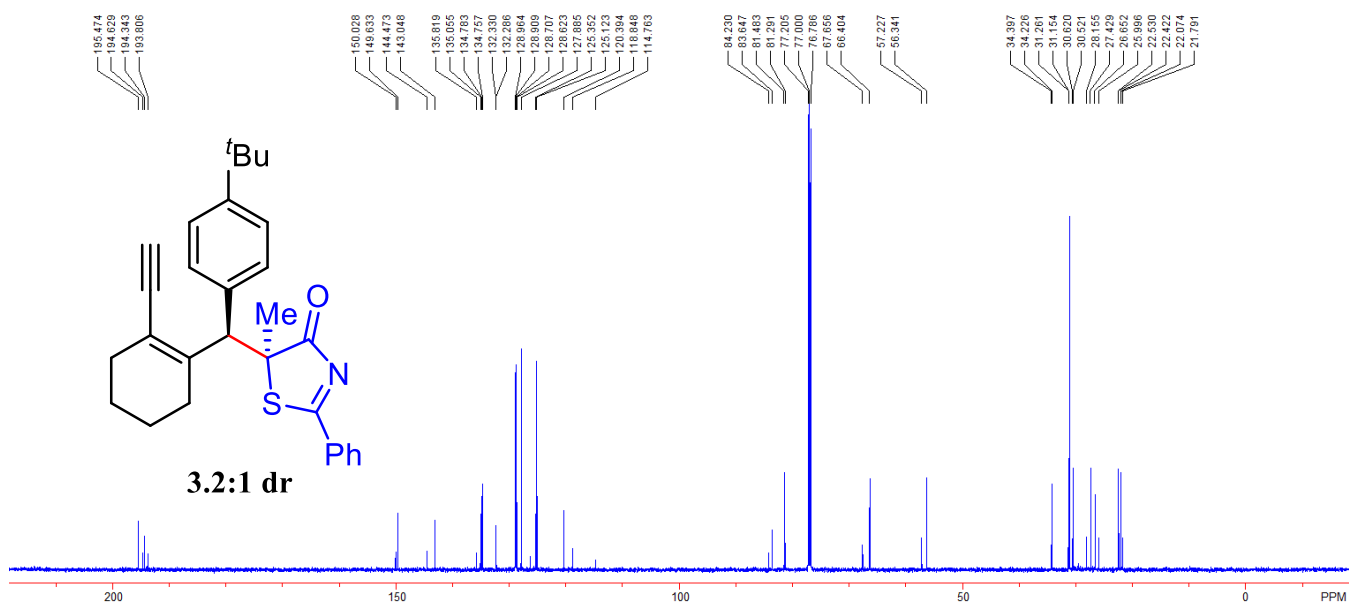

# $^1\text{H}$ and $^{13}\text{C}$ NMR ( $\text{CDCl}_3$ ) Spectra for Compound **3q**

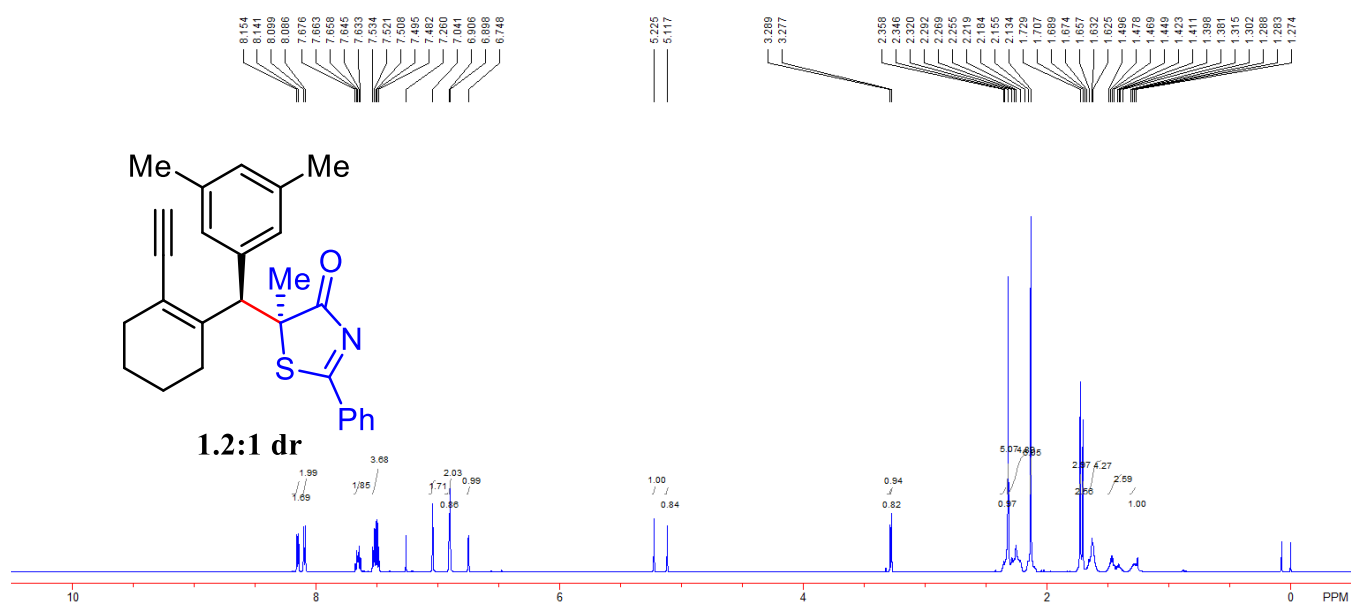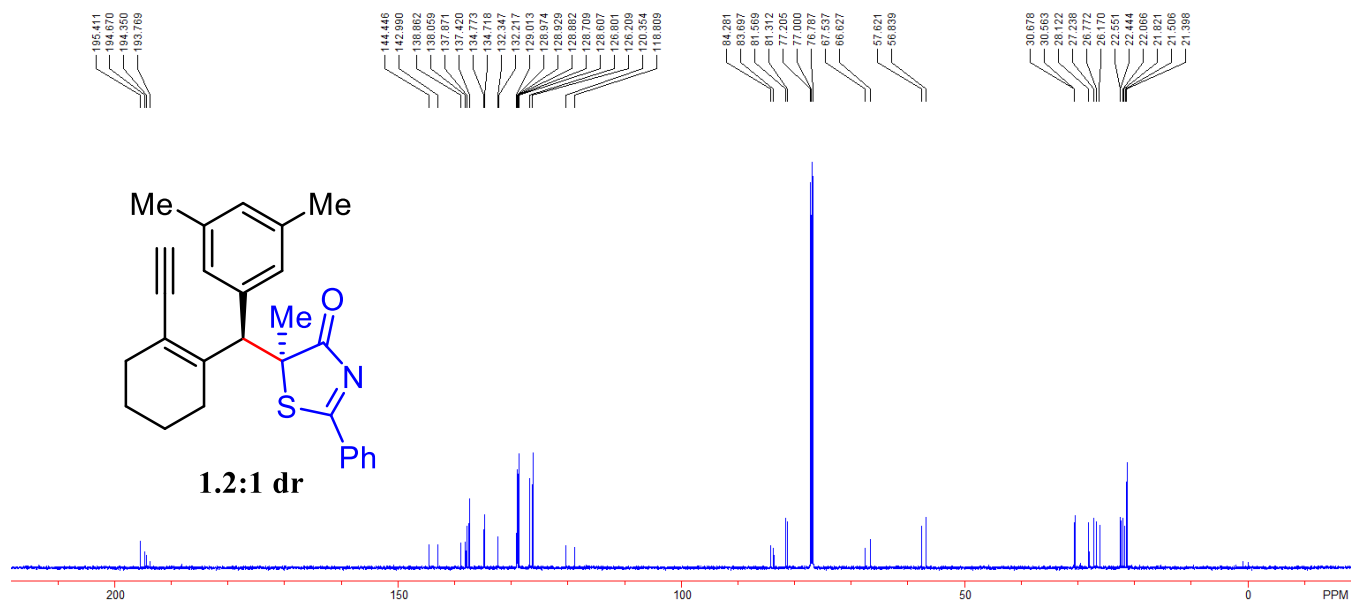

$^1\text{H}$ ,  $^{13}\text{C}$  and  $^{19}\text{F}$  NMR ( $\text{CDCl}_3$ ) Spectra for Compound **3r**

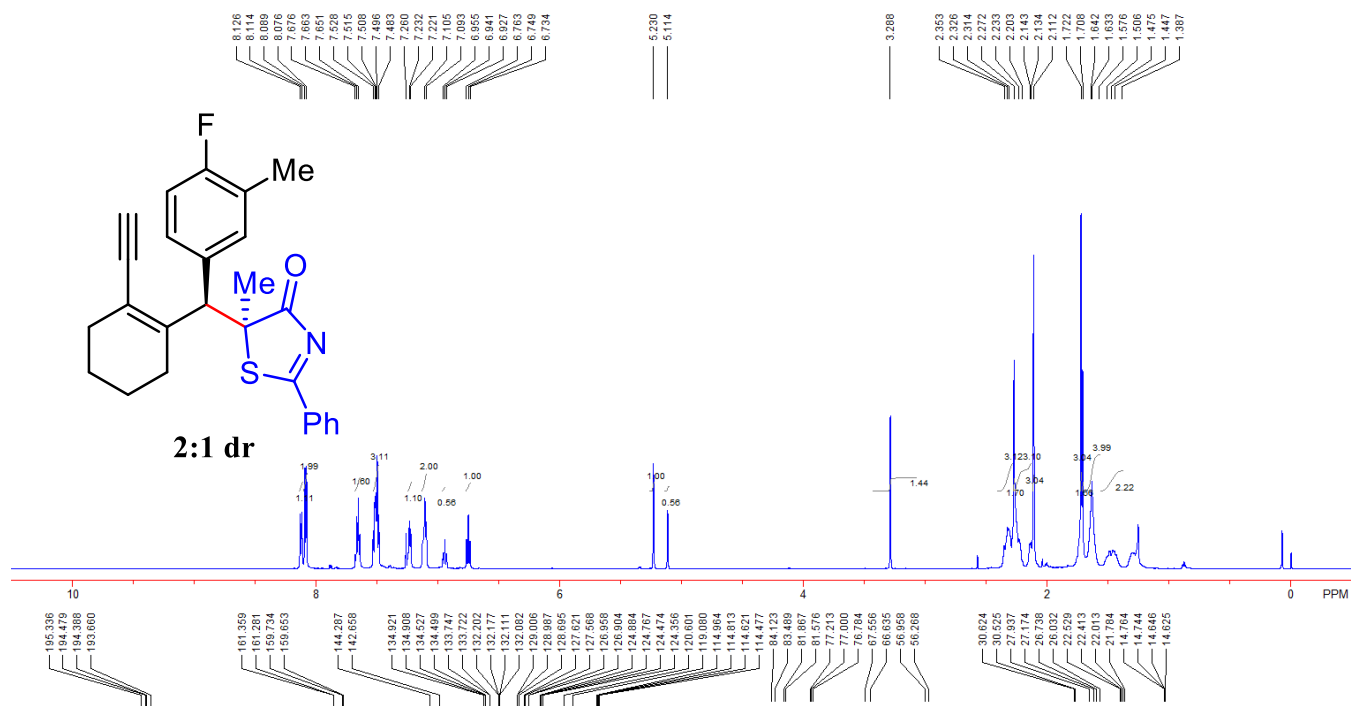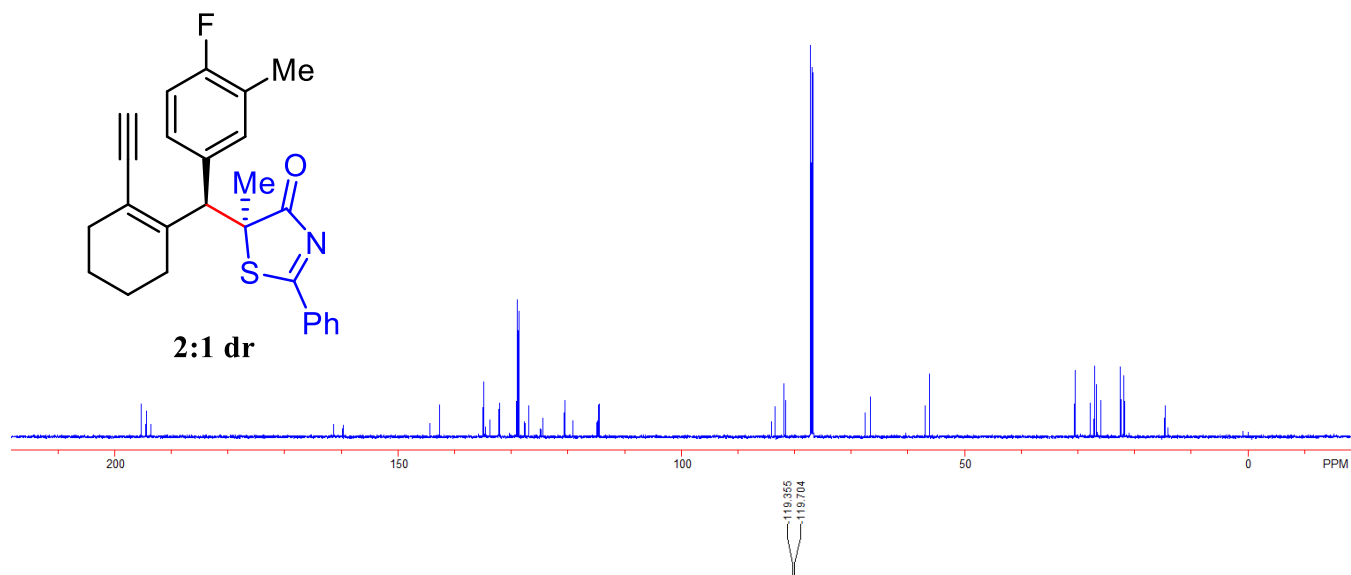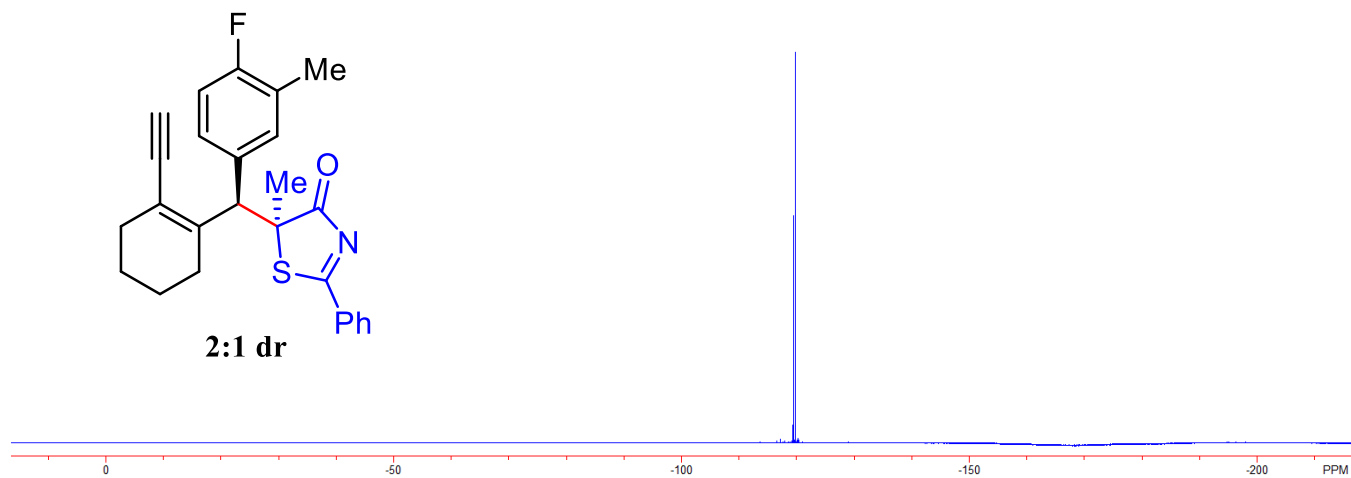



# $^1\text{H}$ and $^{13}\text{C}$ NMR ( $\text{CDCl}_3$ ) Spectra for Compound **3s**

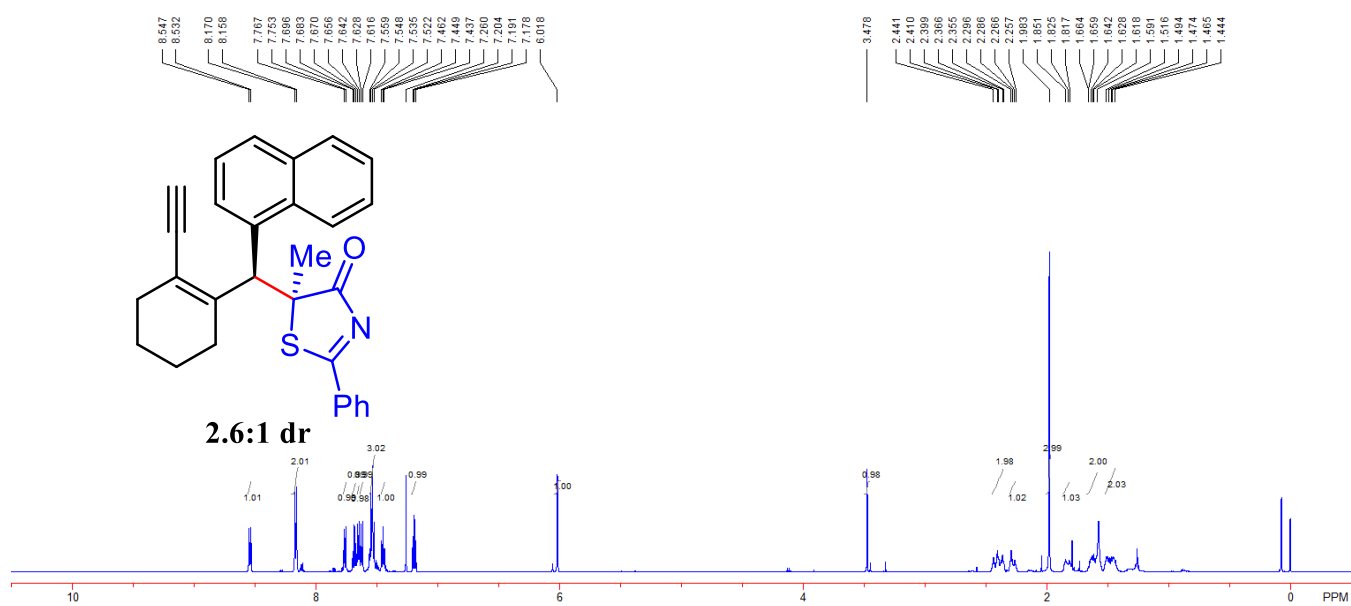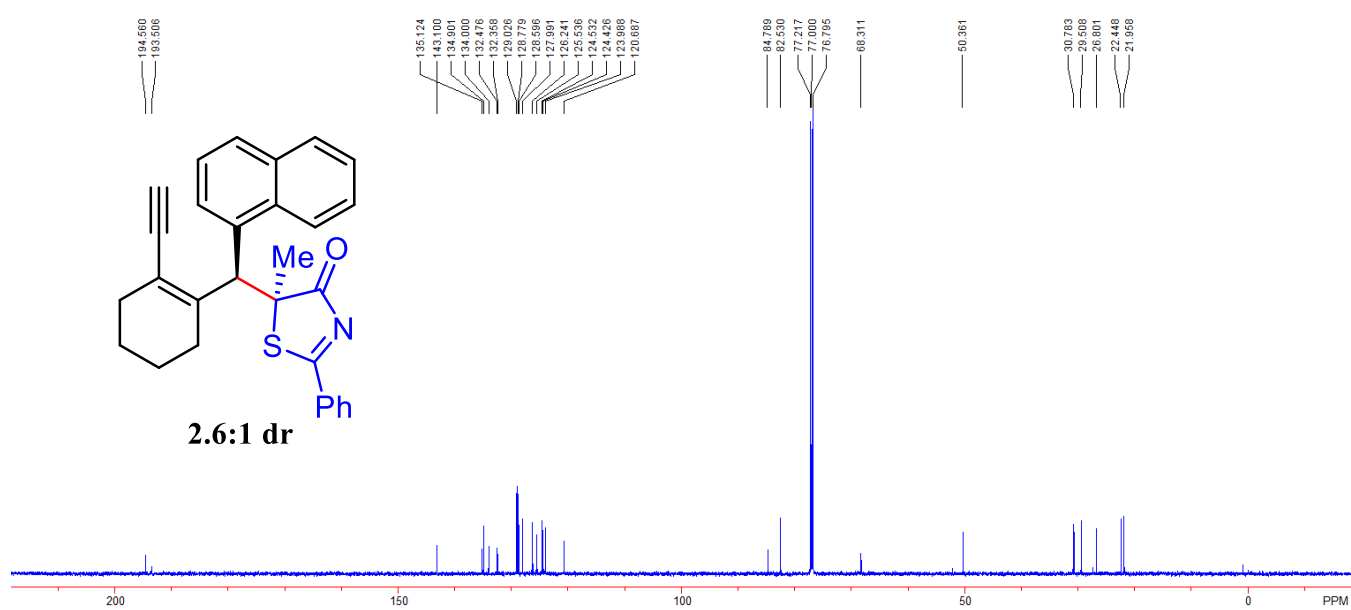

# $^1\text{H}$ and $^{13}\text{C}$ NMR ( $\text{CDCl}_3$ ) Spectra for Compound **3t**

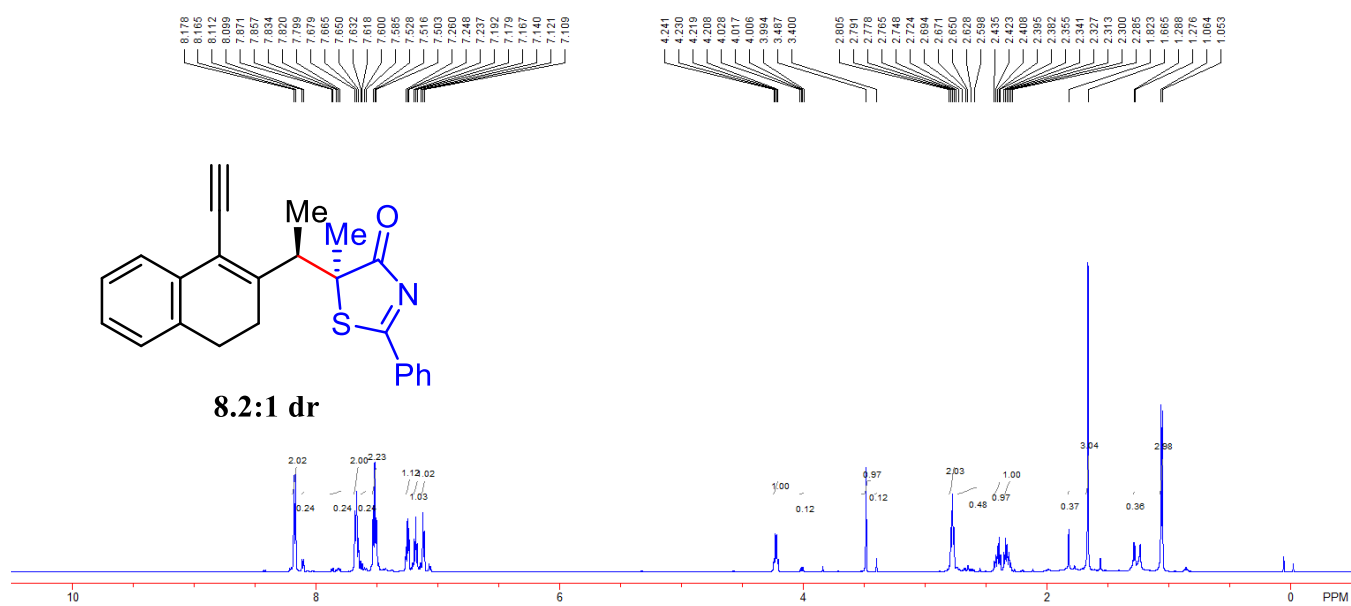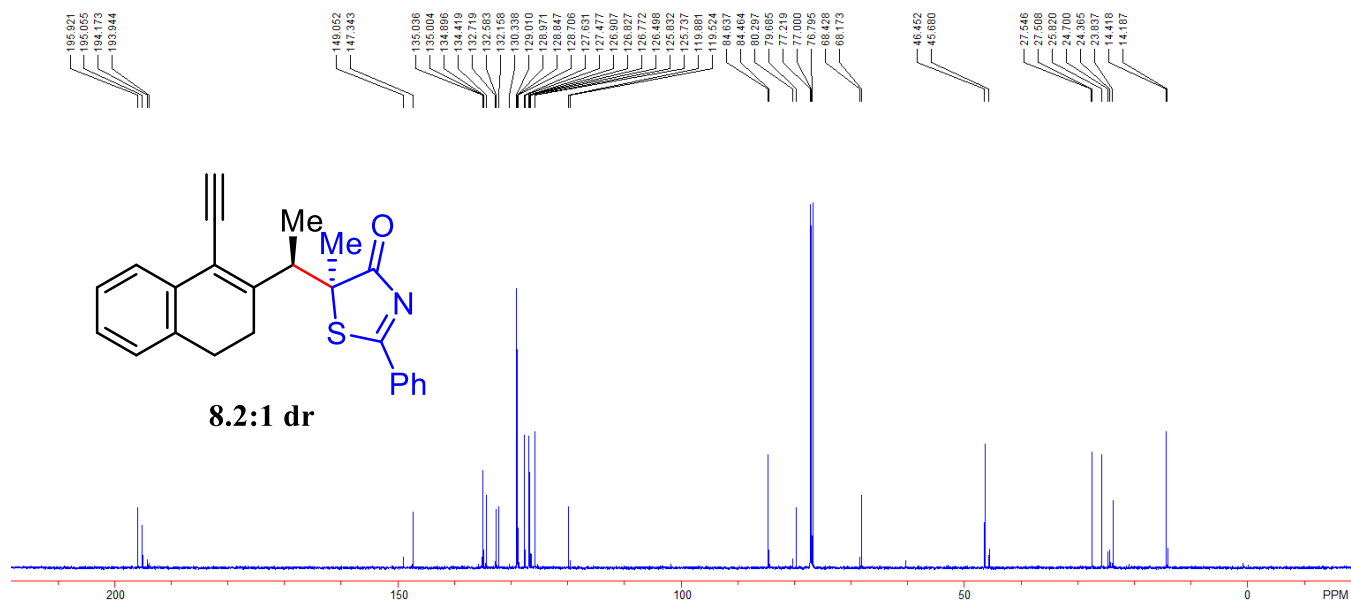

# $^1\text{H}$ and $^{13}\text{C}$ NMR ( $\text{CDCl}_3$ ) Spectra for Compound **3u**

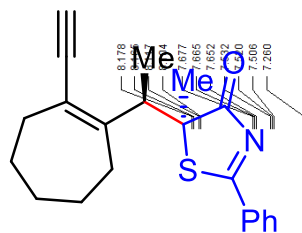

**7.5:1 dr**

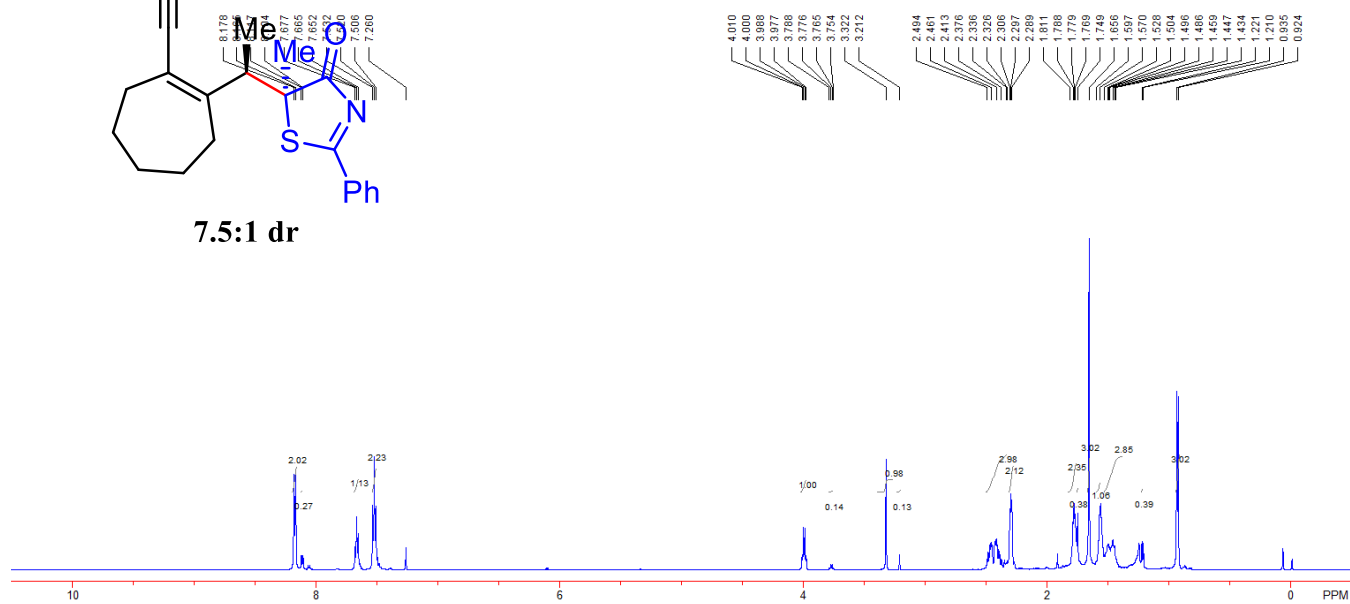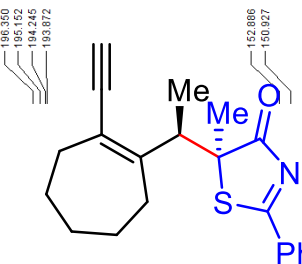

**7.5:1 dr**

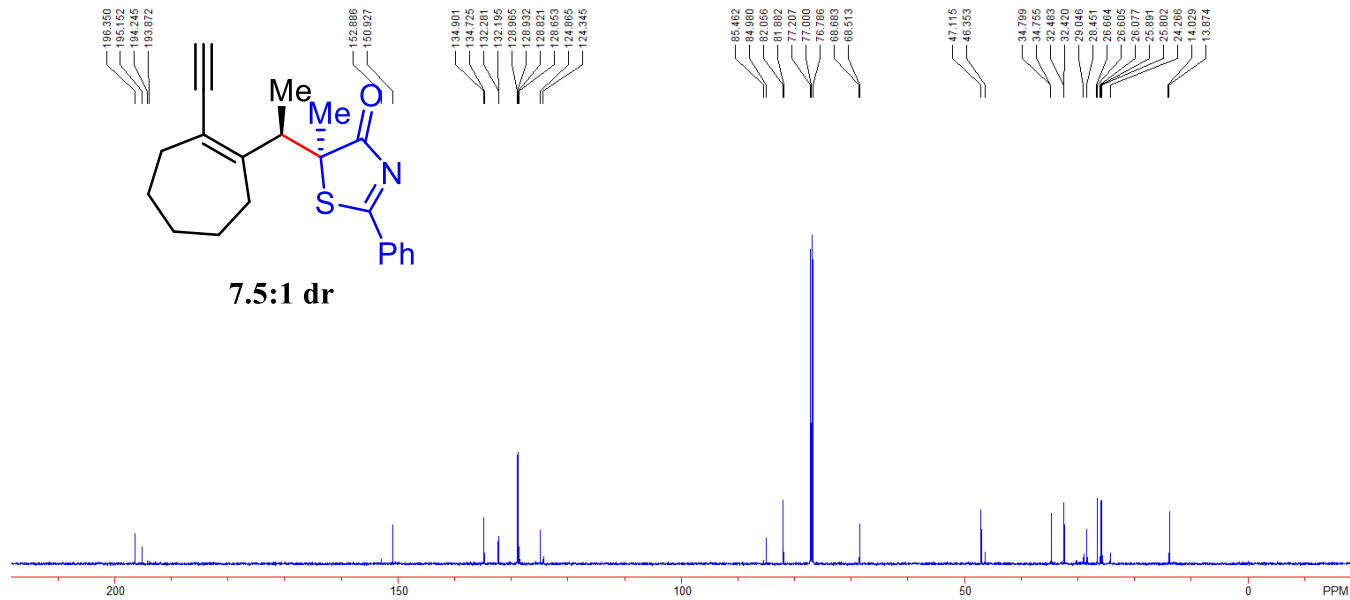

# $^1\text{H}$ and $^{13}\text{C}$ NMR ( $\text{CDCl}_3$ ) Spectra for Compound **3v**

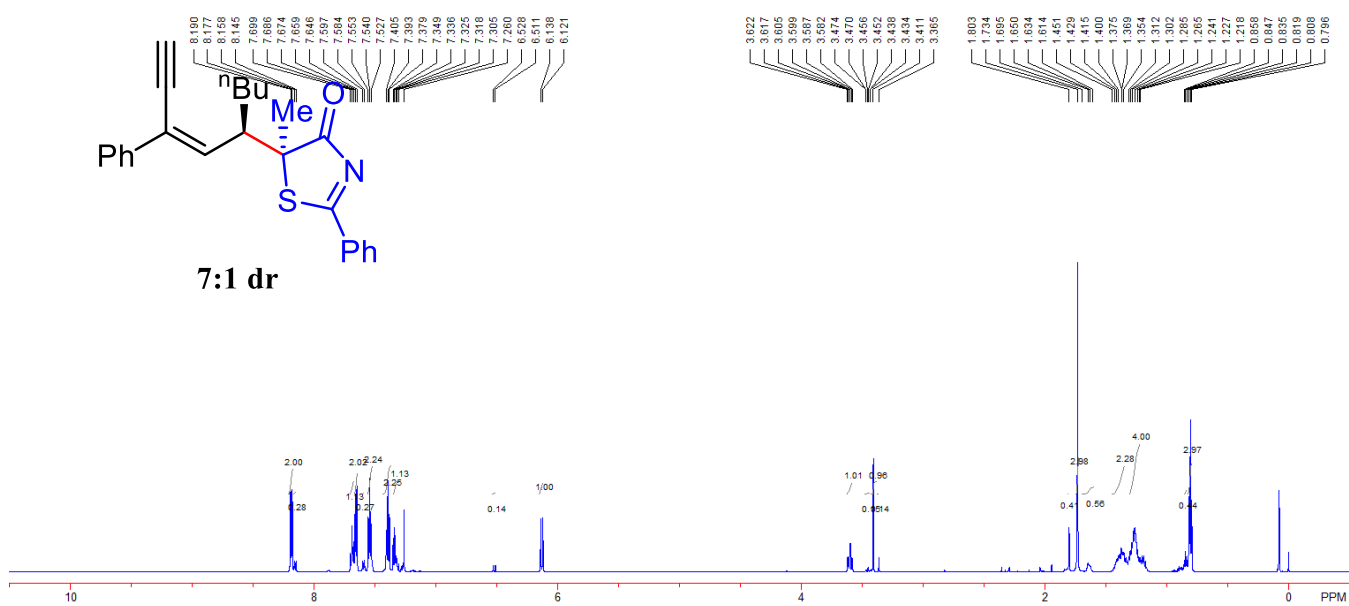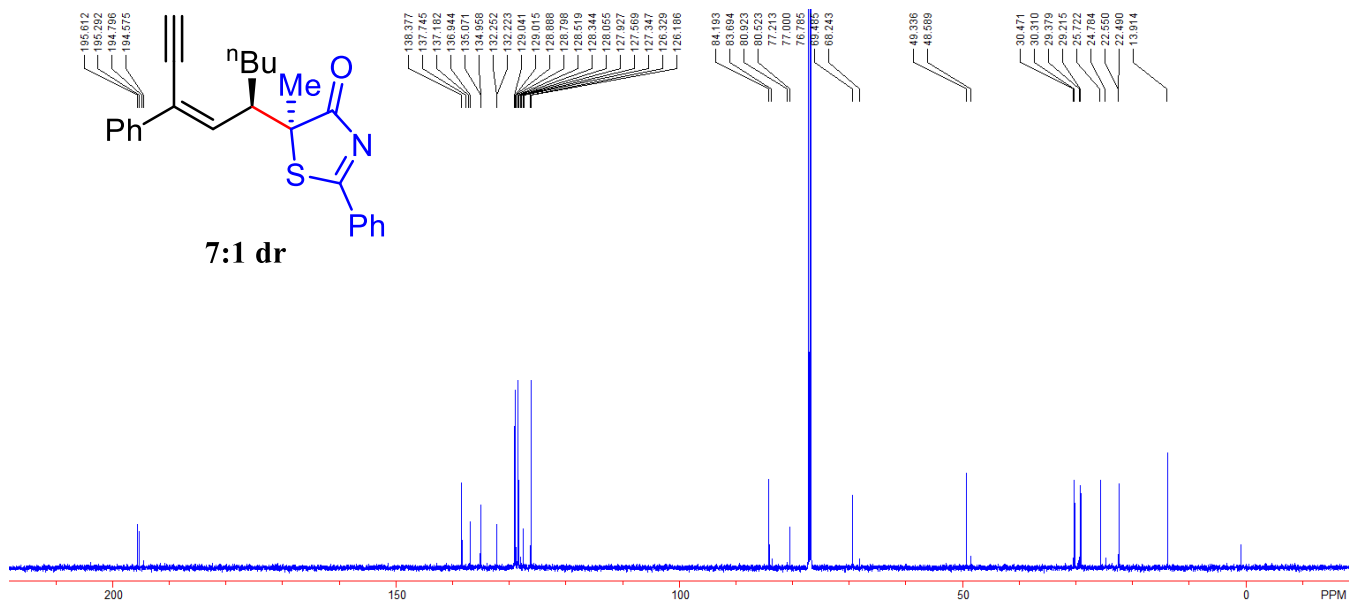

# $^1\text{H}$ and $^{13}\text{C}$ NMR ( $\text{CDCl}_3$ ) Spectra for Compound **3w**

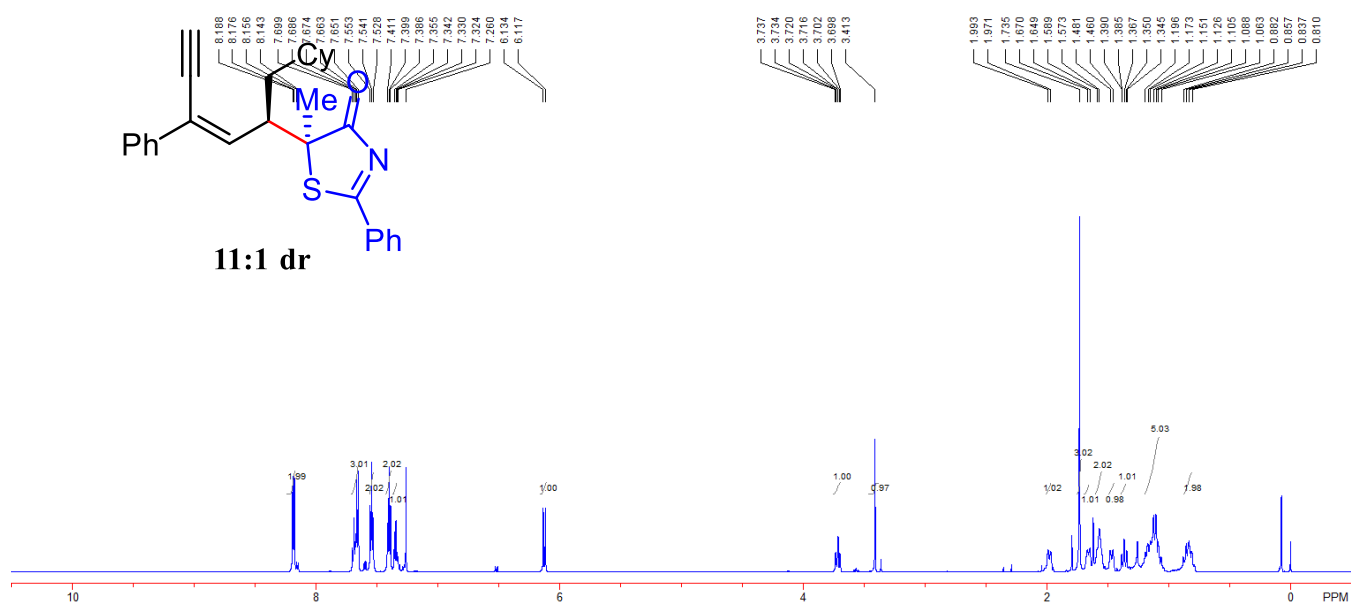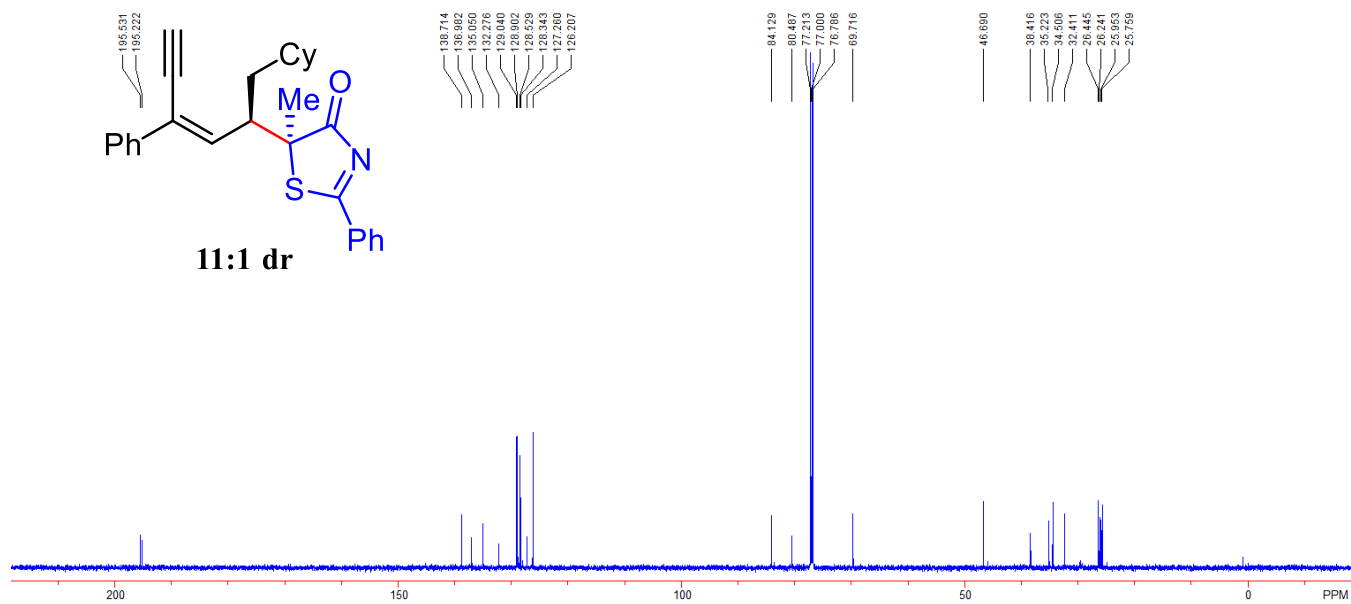

# $^1\text{H}$ and $^{13}\text{C}$ NMR ( $\text{CDCl}_3$ ) Spectra for Compound **4a**

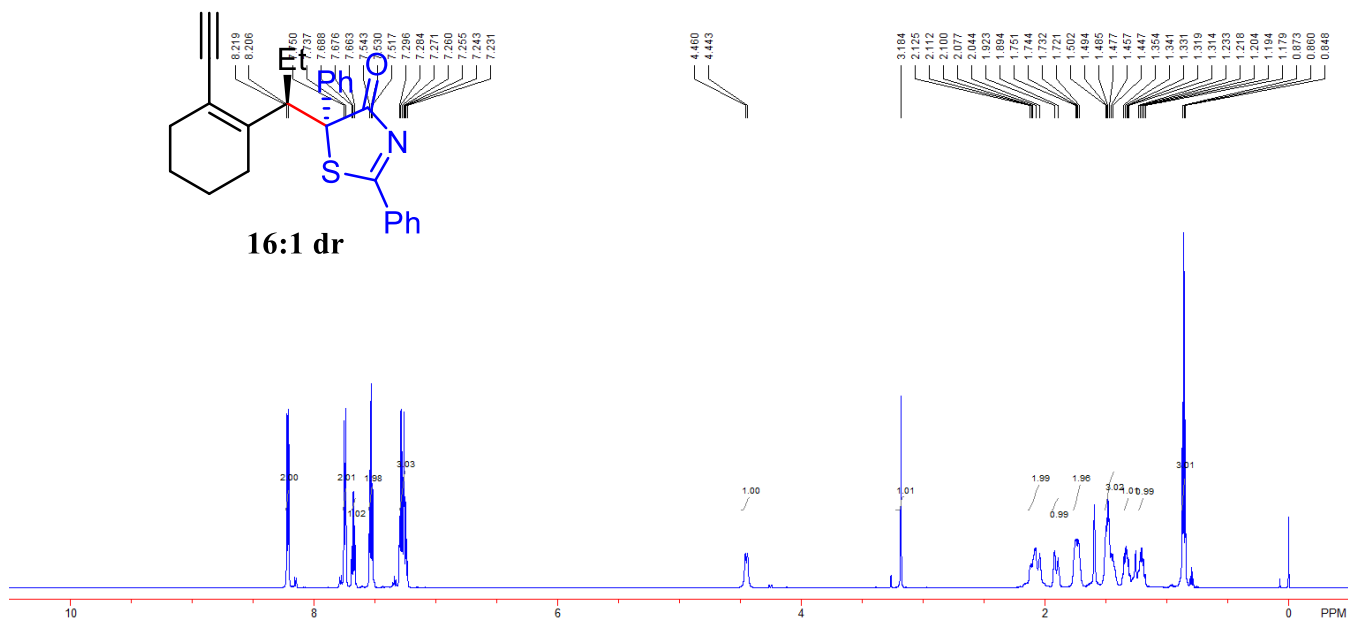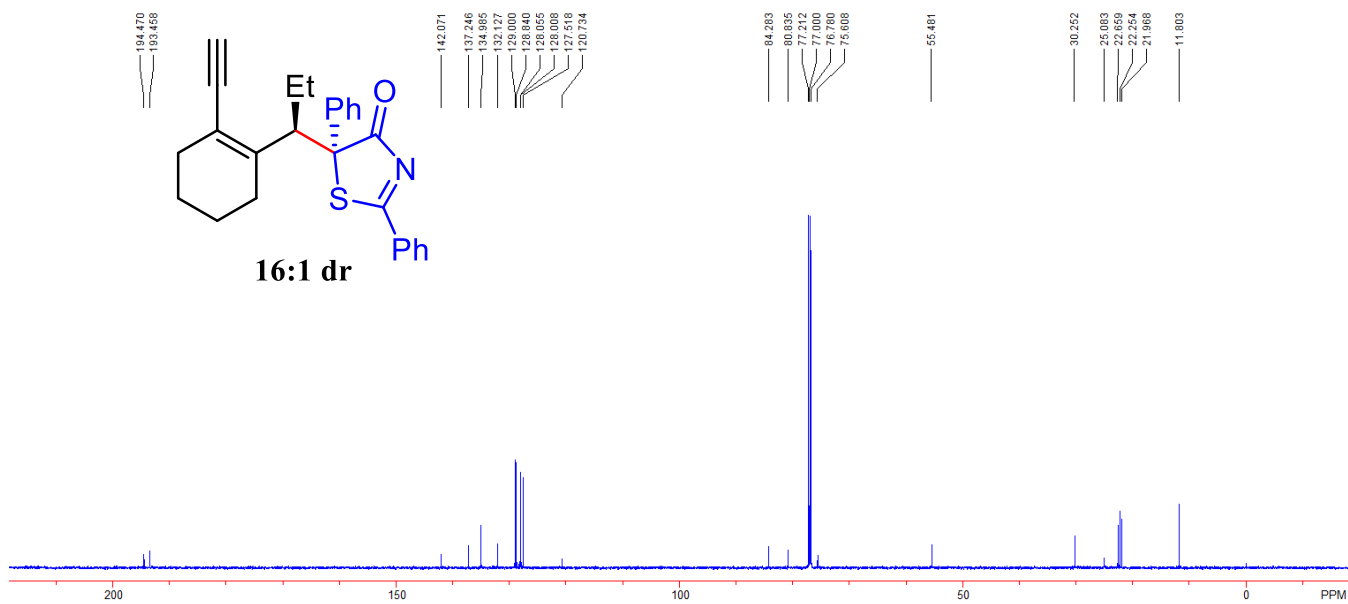

# $^1\text{H}$ and $^{13}\text{C}$ NMR ( $\text{CDCl}_3$ ) Spectra for Compound **4b**

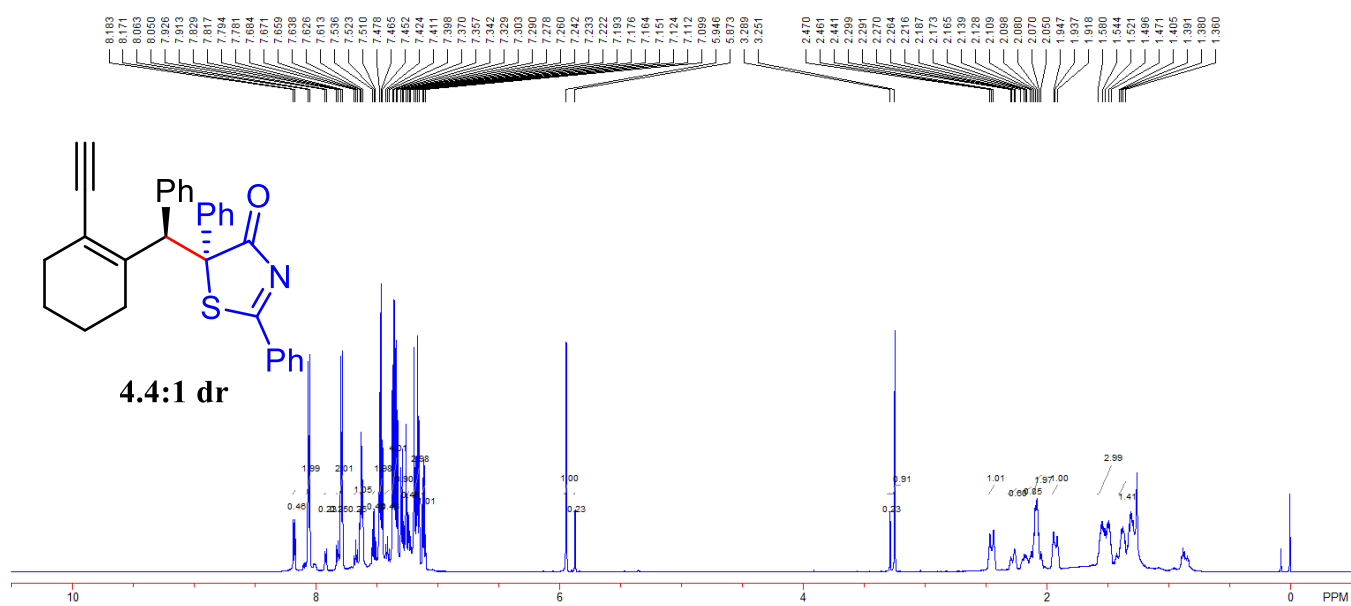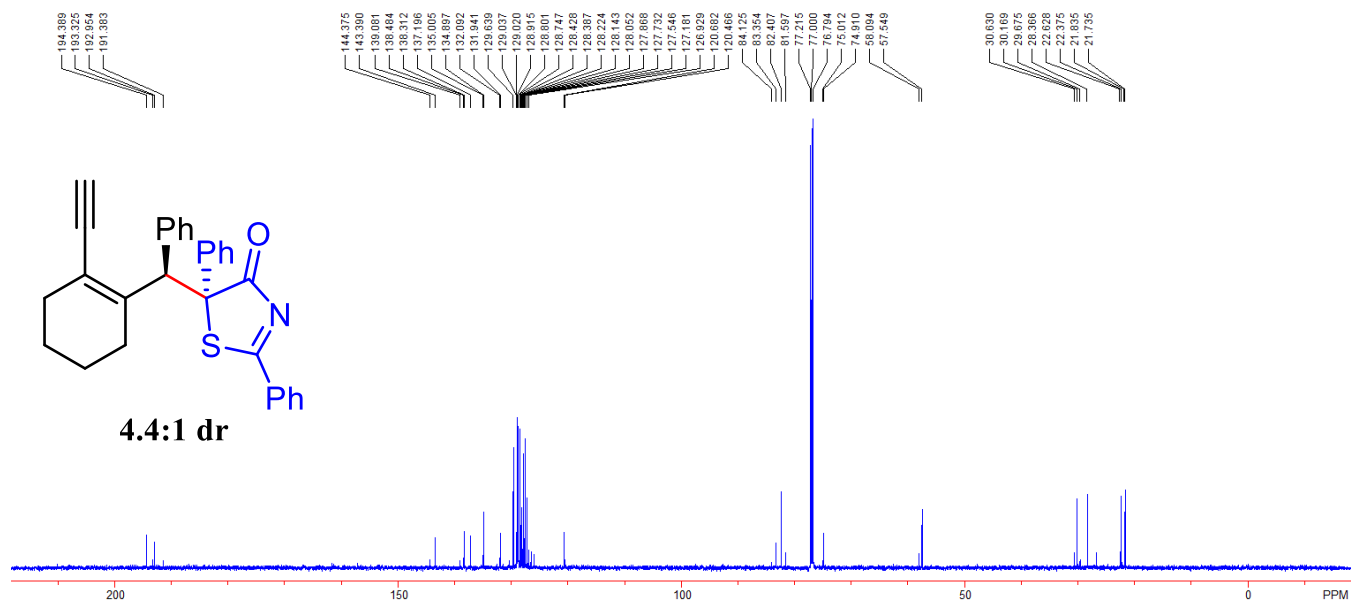

# <sup>1</sup>H and <sup>13</sup>C NMR (CDCl<sub>3</sub>) Spectra for Compound **4c**

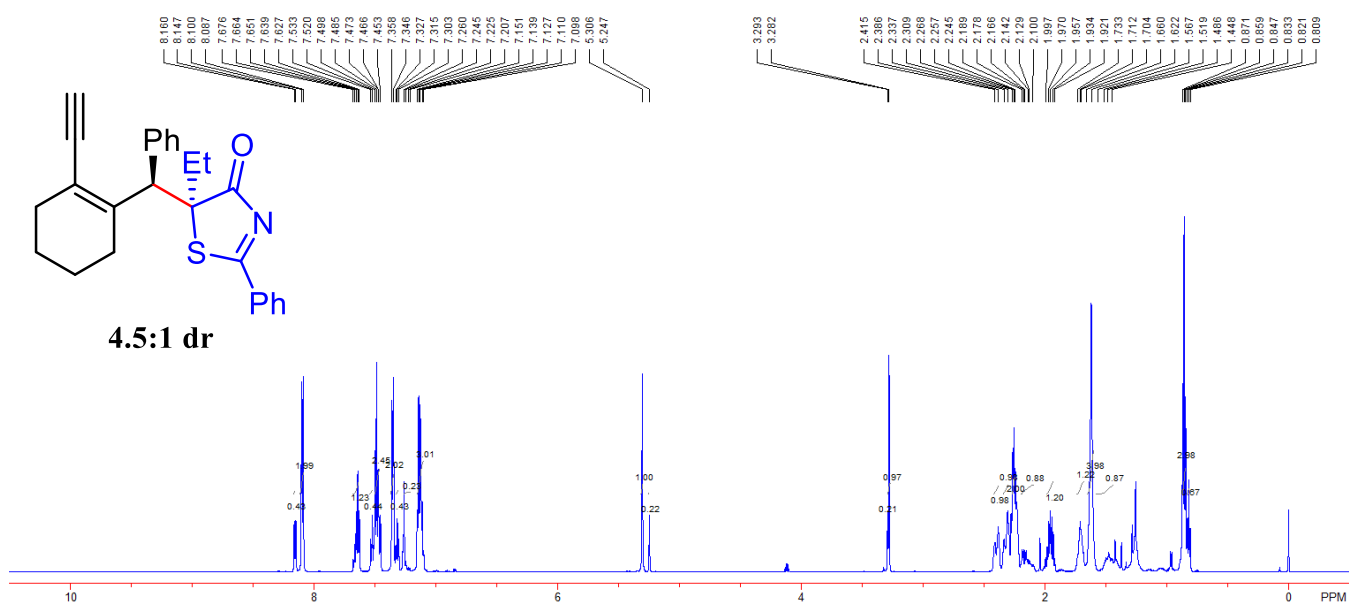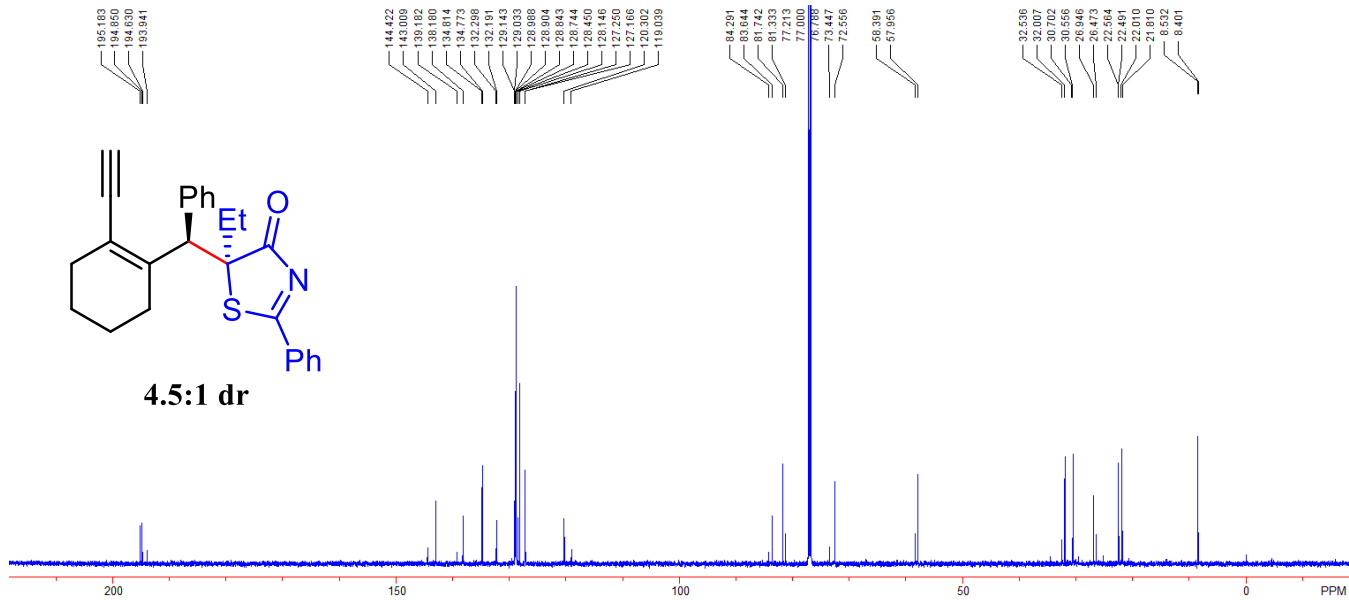



# $^1\text{H}$ and $^{13}\text{C}$ NMR ( $\text{CDCl}_3$ ) Spectra for Compound **4d**

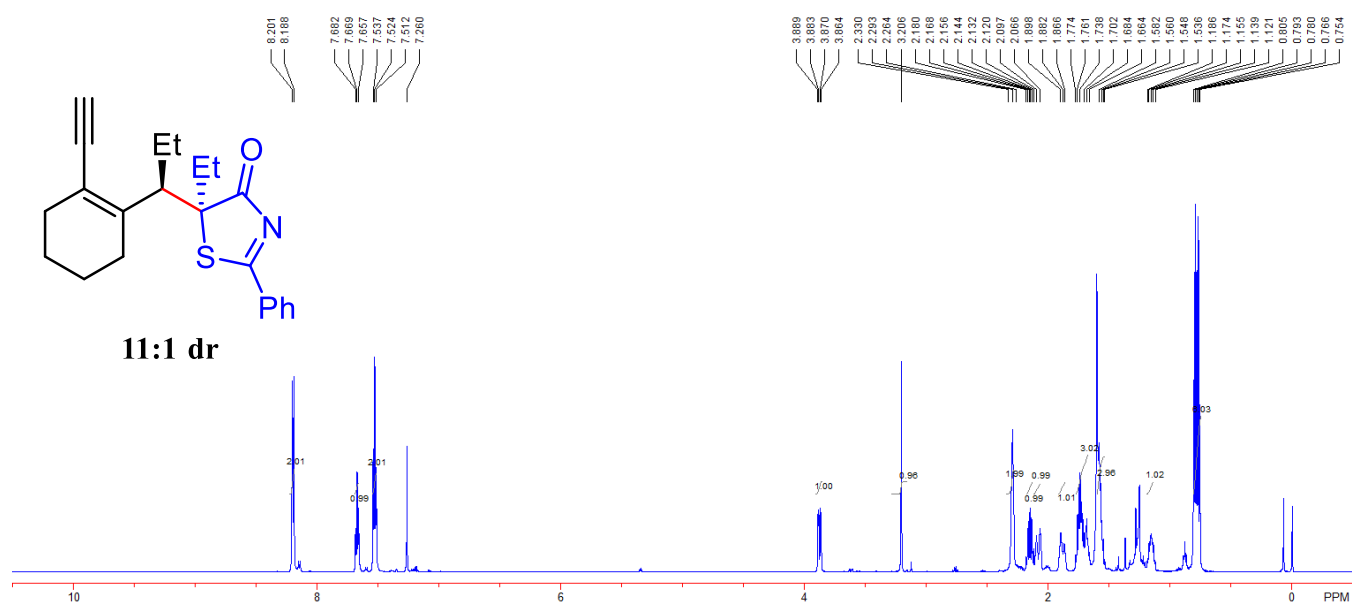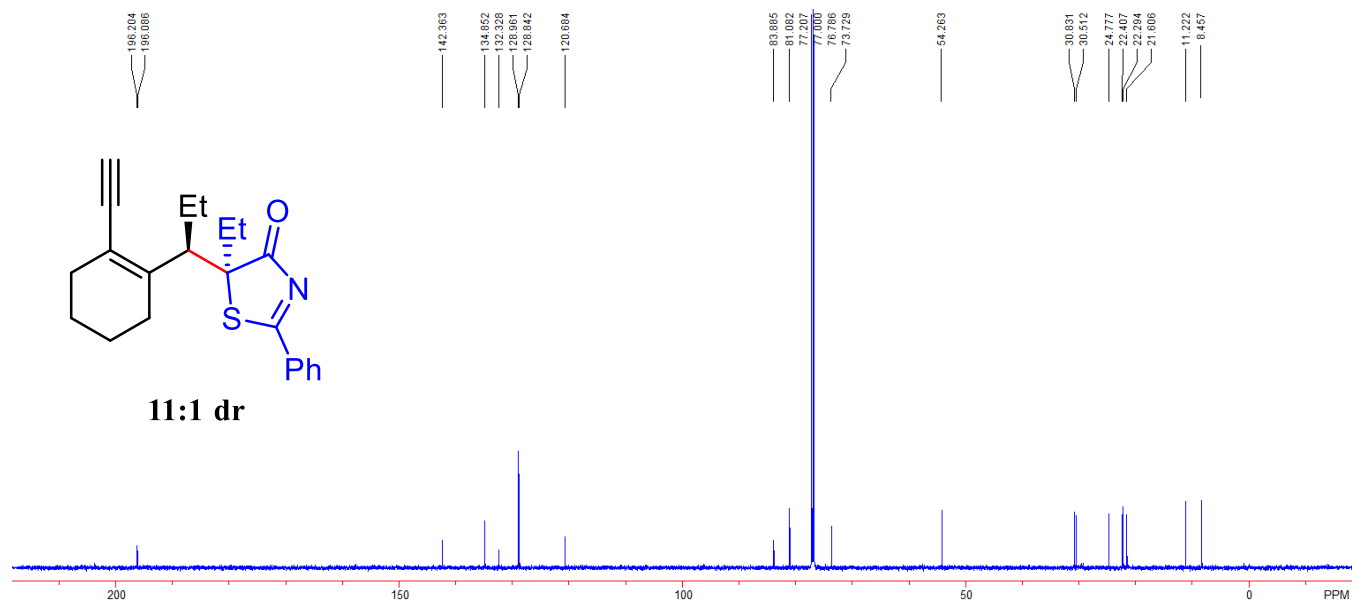

# $^1\text{H}$ and $^{13}\text{C}$ NMR ( $\text{CDCl}_3$ ) Spectra for Compound **4e**

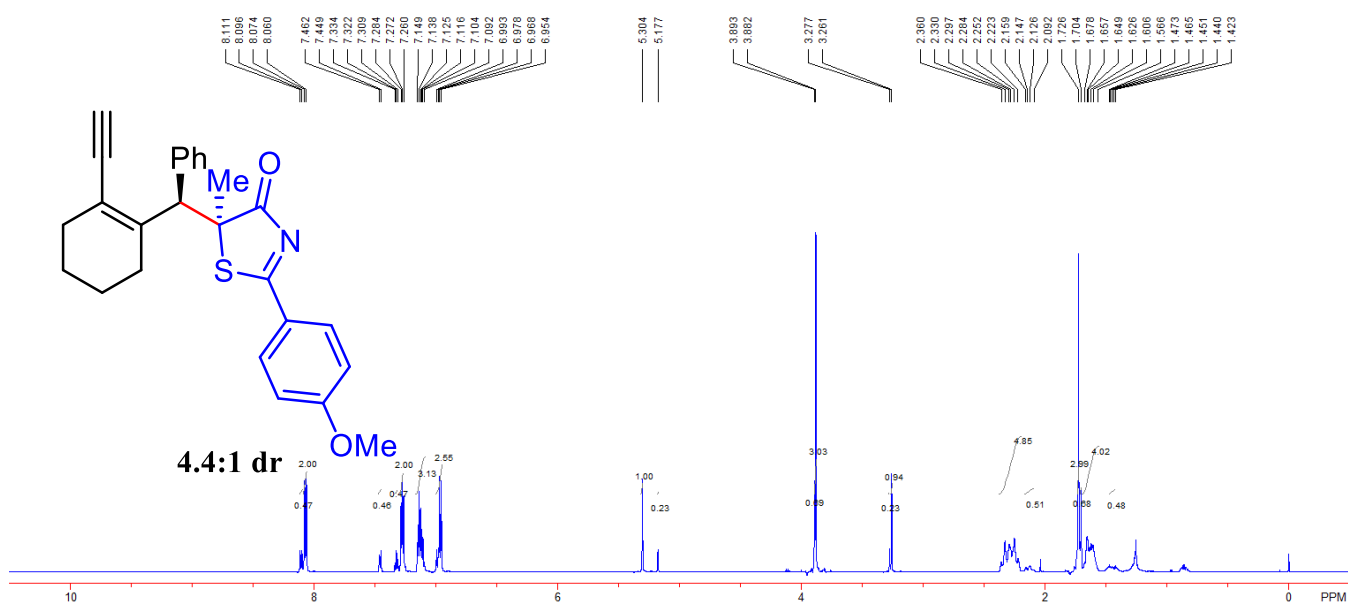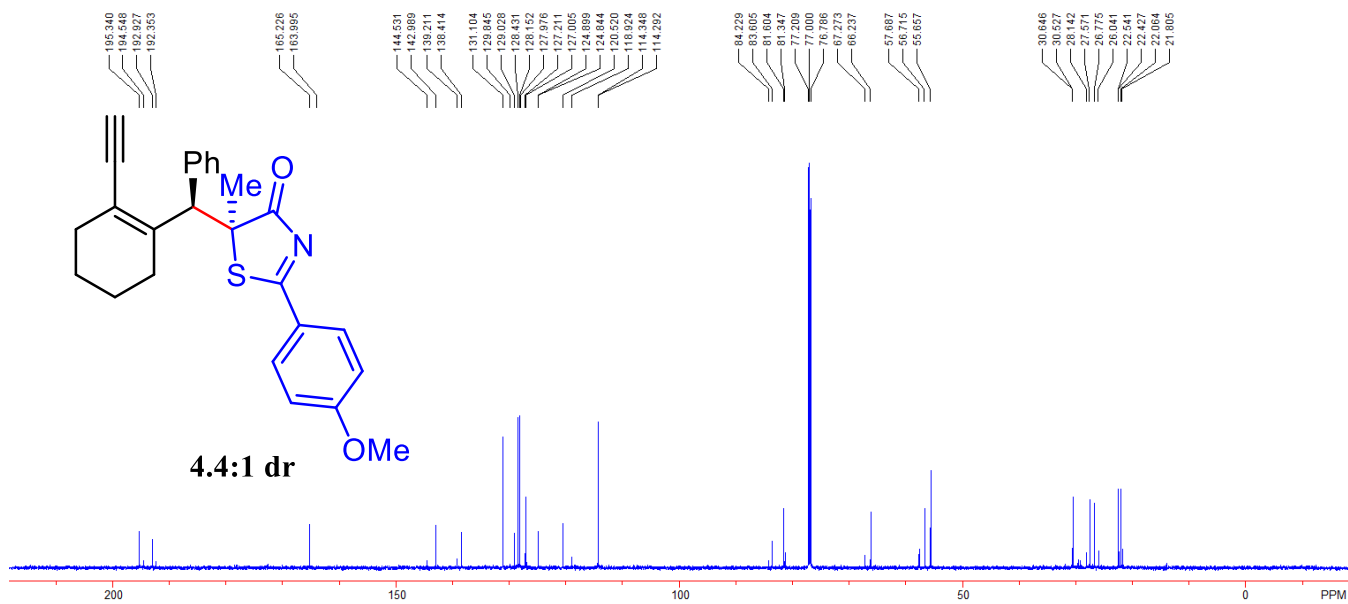

$^1\text{H}$  and  $^{13}\text{C}$  NMR ( $\text{CDCl}_3$ ) Spectra for Compound **4f**

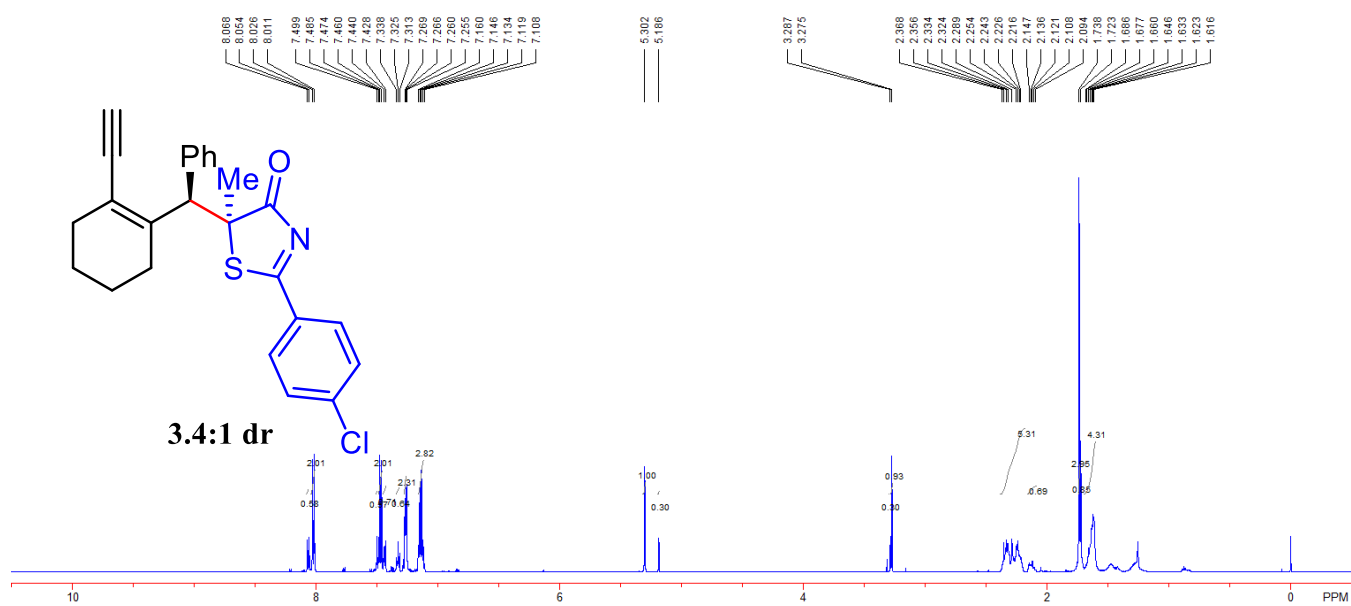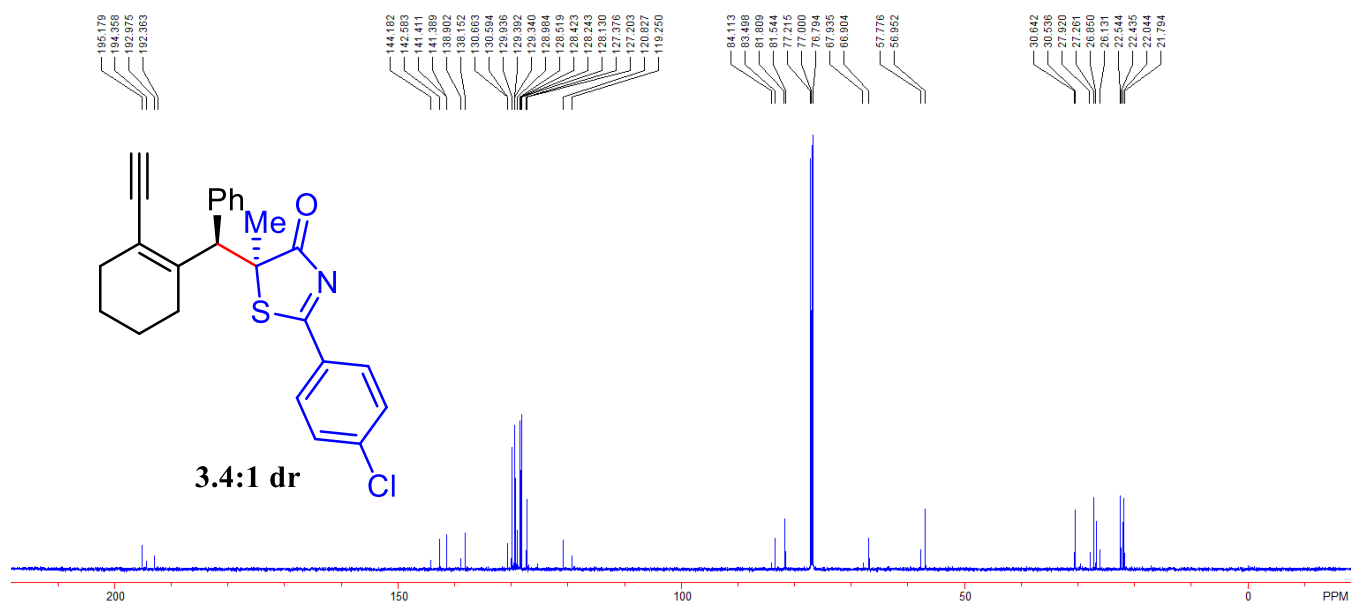

# $^1\text{H}$ and $^{13}\text{C}$ NMR ( $\text{CDCl}_3$ ) Spectra for Compound **4g**

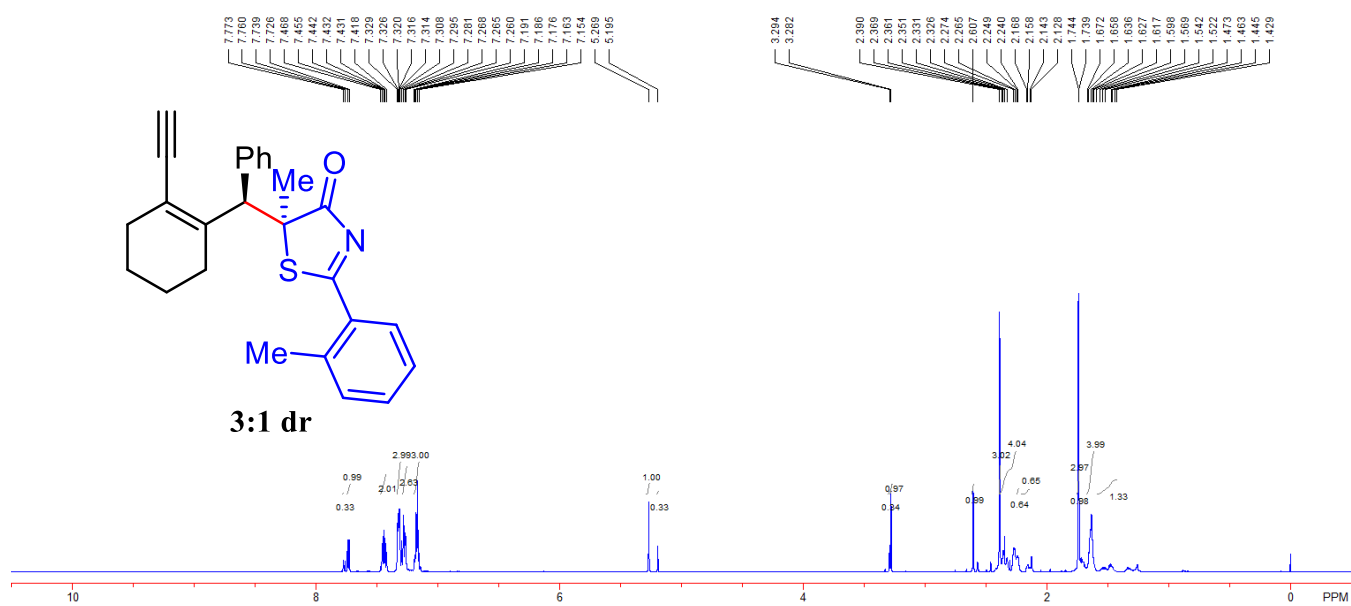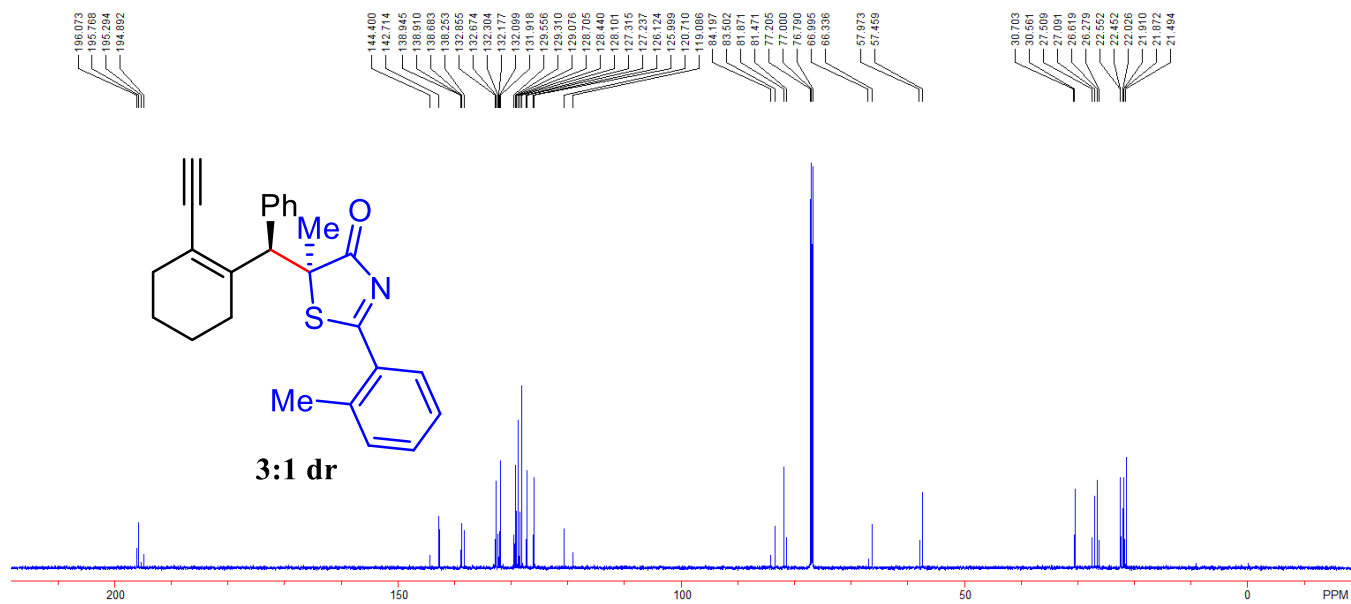

# $^1\text{H}$ and $^{13}\text{C}$ NMR ( $\text{CDCl}_3$ ) Spectra for Compound **5a**

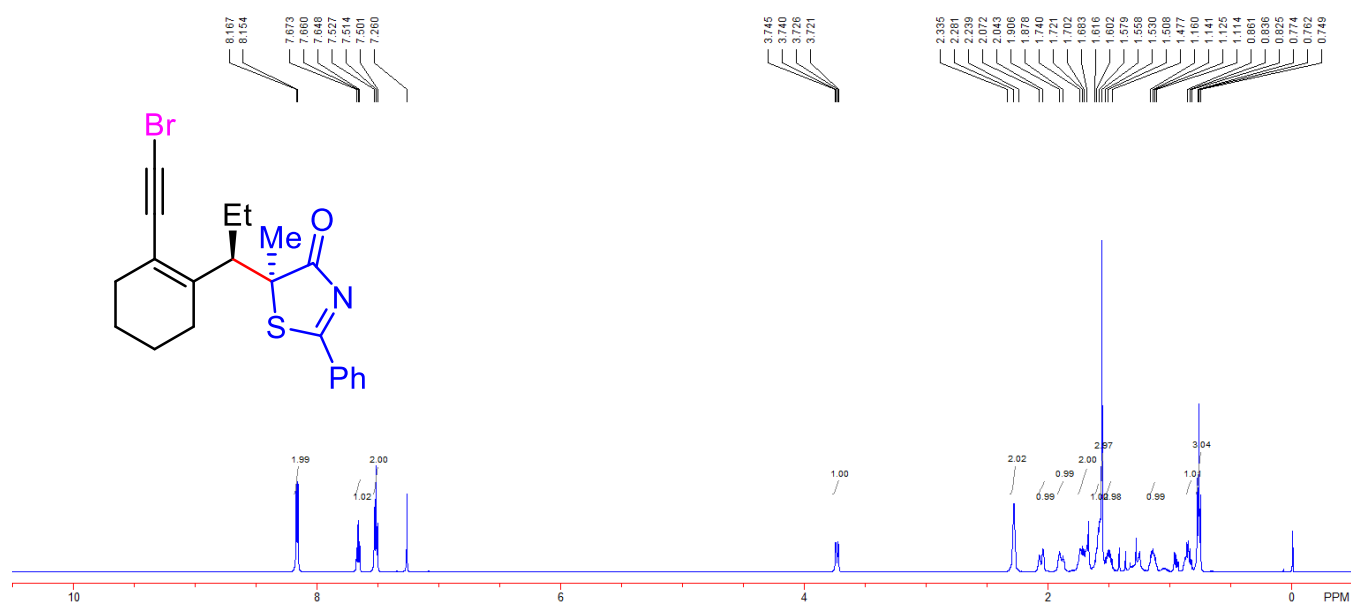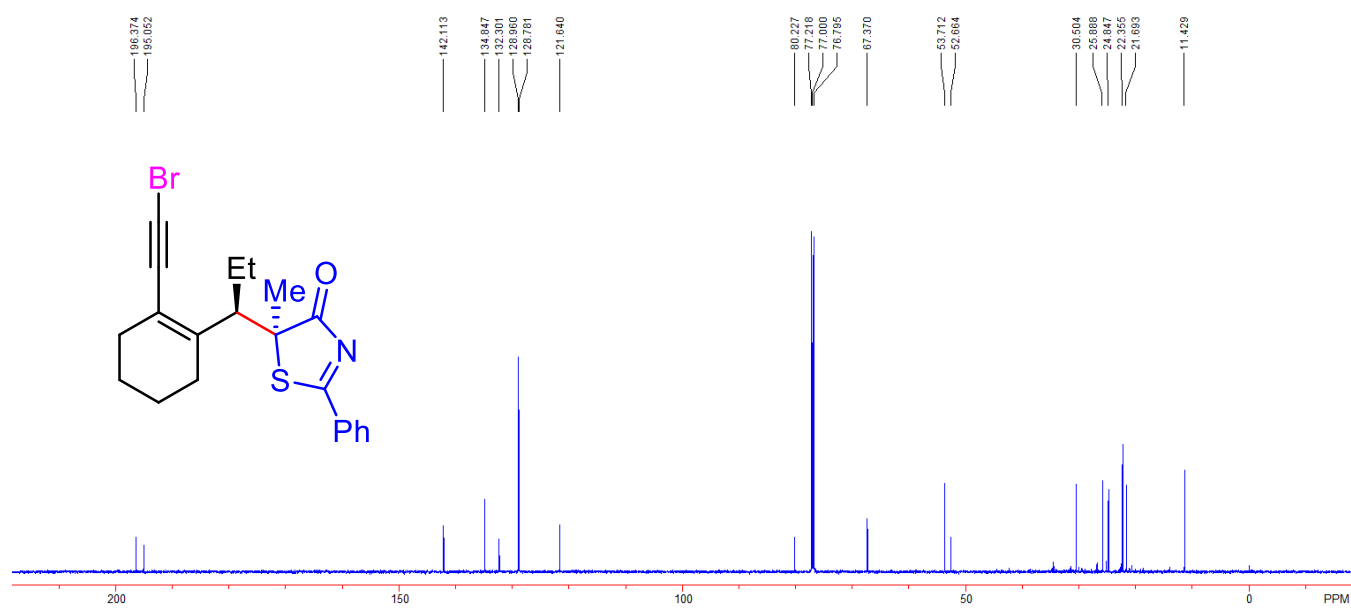

# $^1\text{H}$ and $^{13}\text{C}$ NMR ( $\text{CDCl}_3$ ) Spectra for Compound **5b**

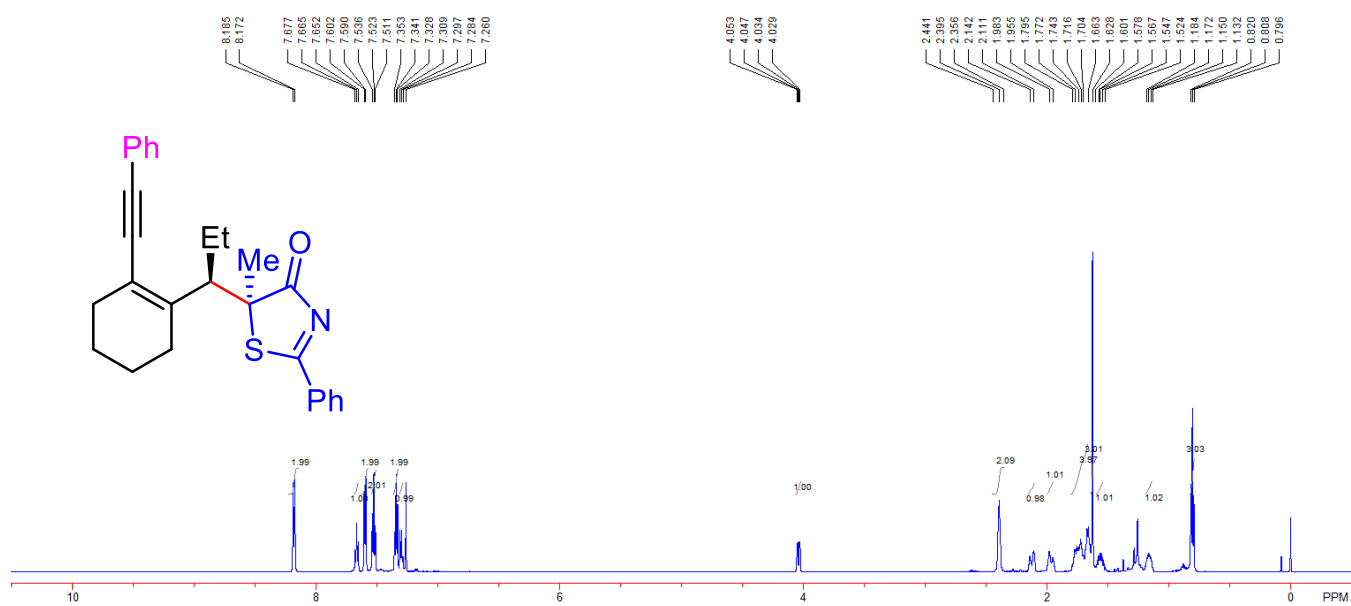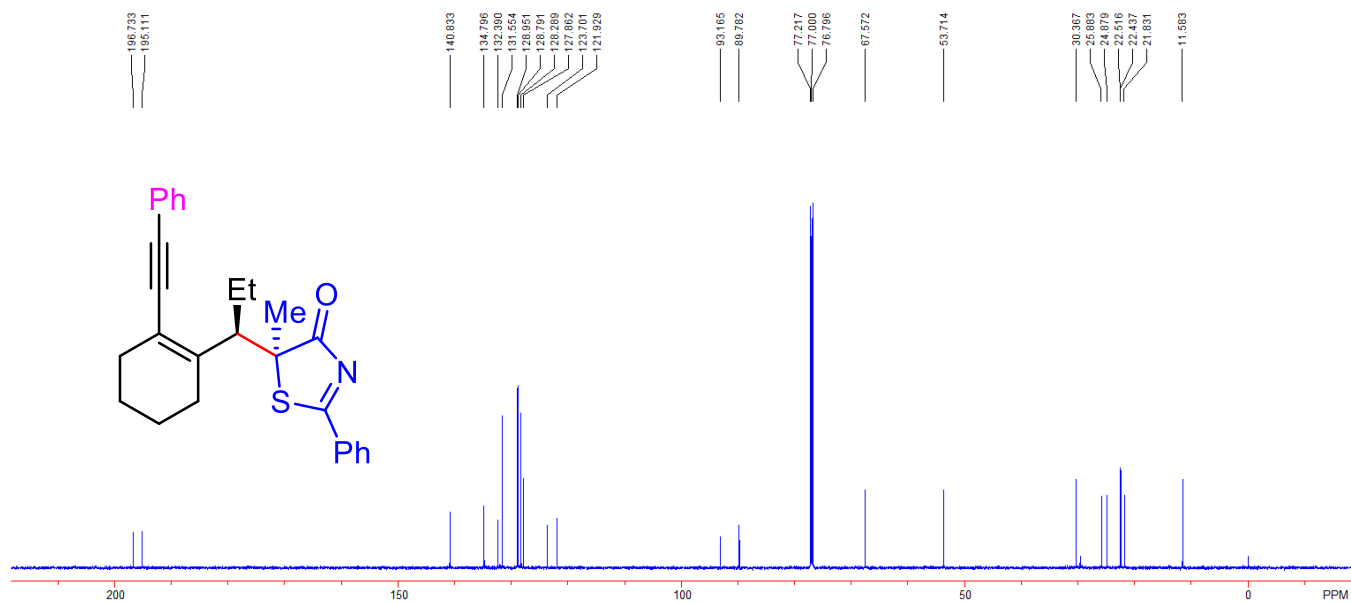

# $^1\text{H}$ and $^{13}\text{C}$ NMR ( $\text{CDCl}_3$ ) Spectra for Compound **5c**

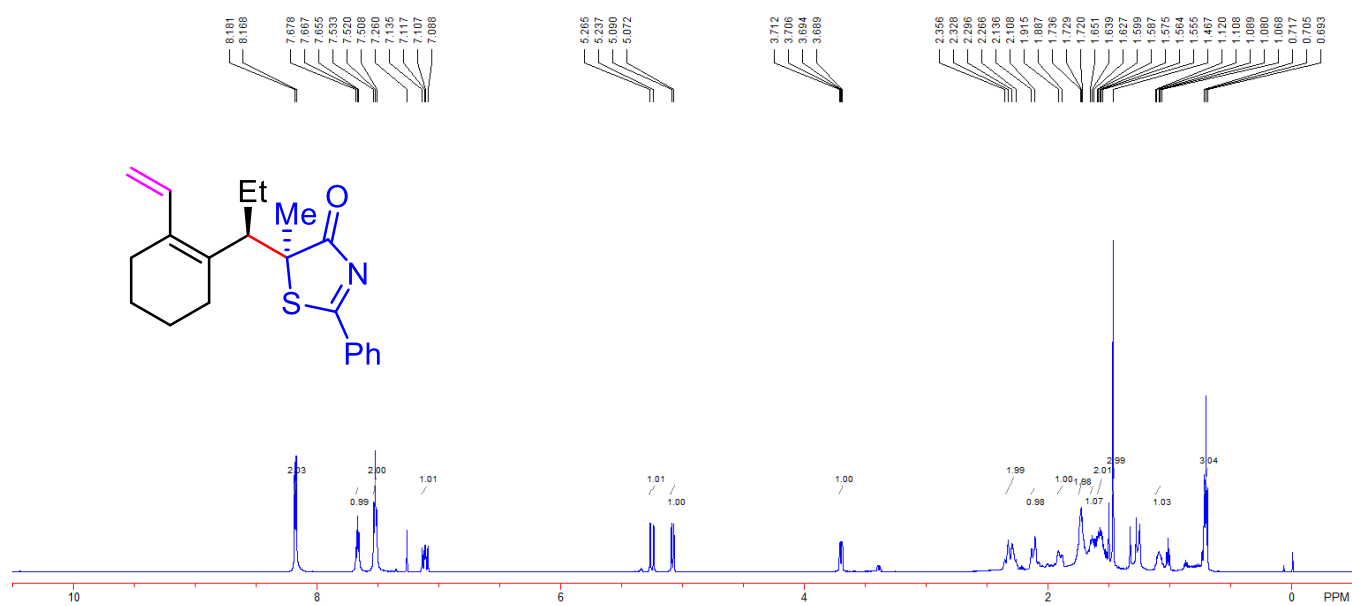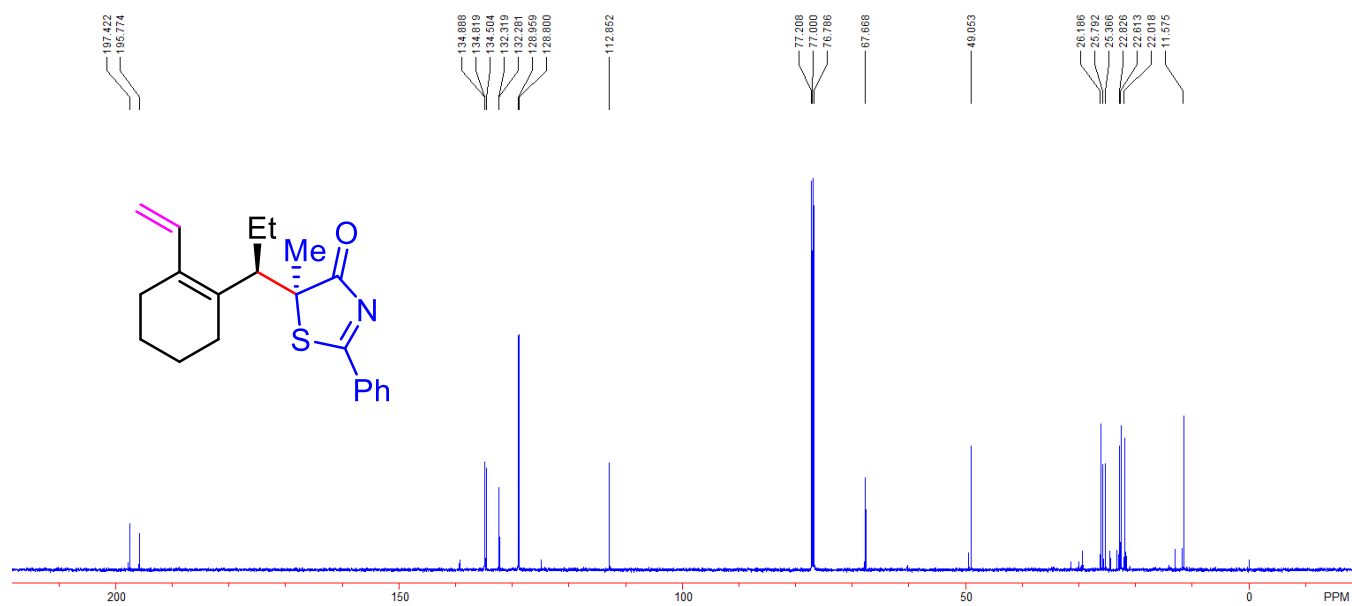

# $^1\text{H}$ and $^{13}\text{C}$ NMR ( $\text{CDCl}_3$ ) Spectra for Compound **5d**

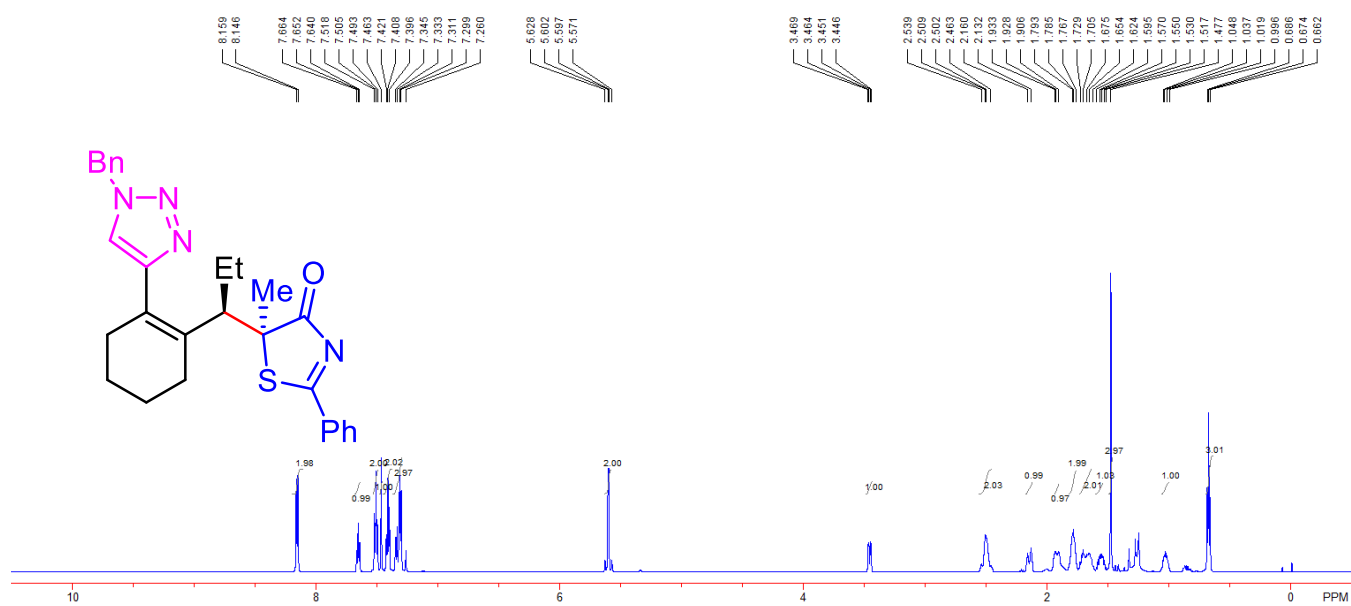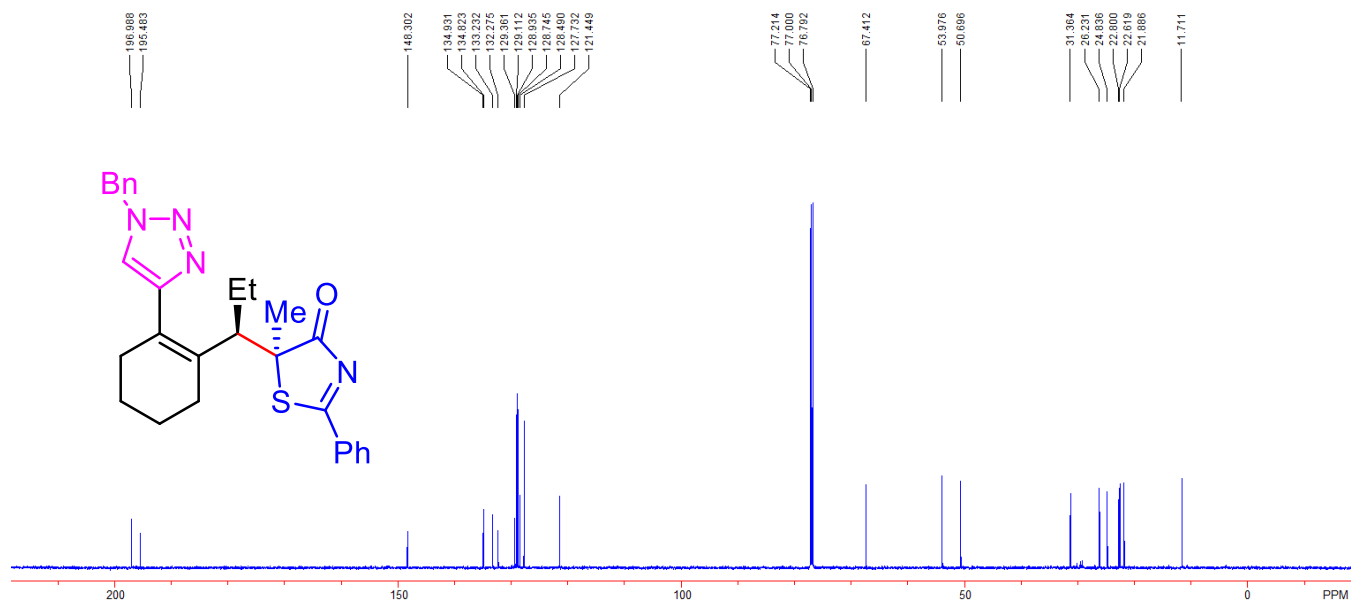



# $^1\text{H}$ and $^{13}\text{C}$ NMR ( $\text{CDCl}_3$ ) Spectra for Compound **5e**

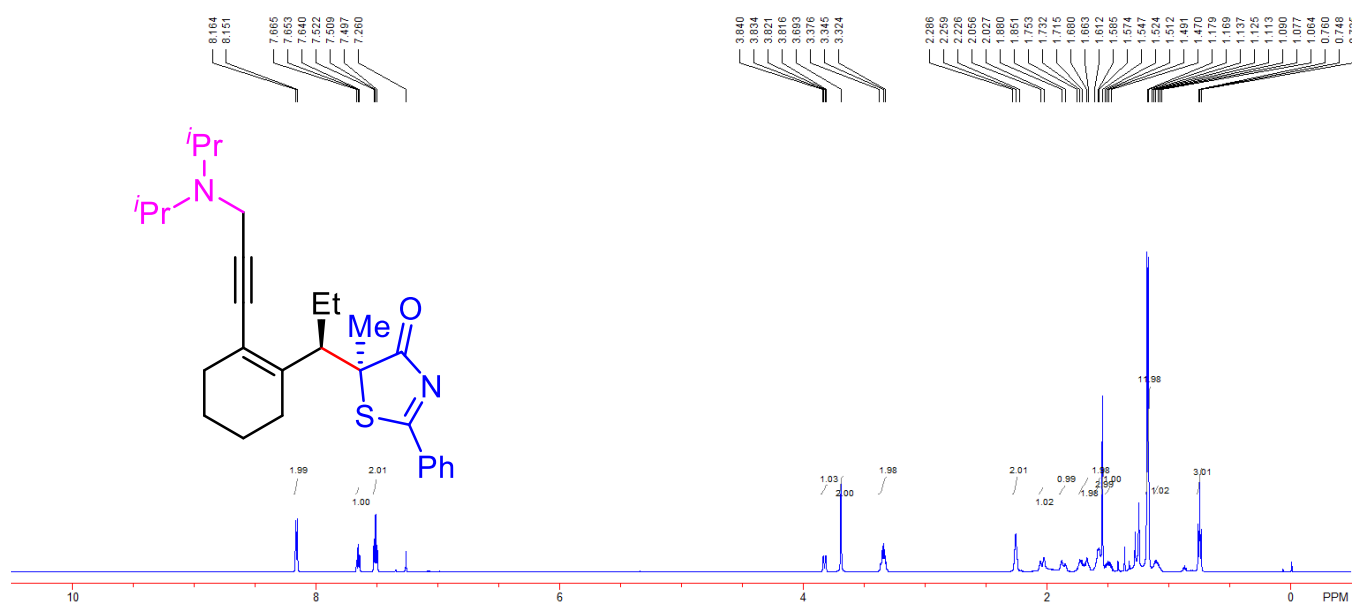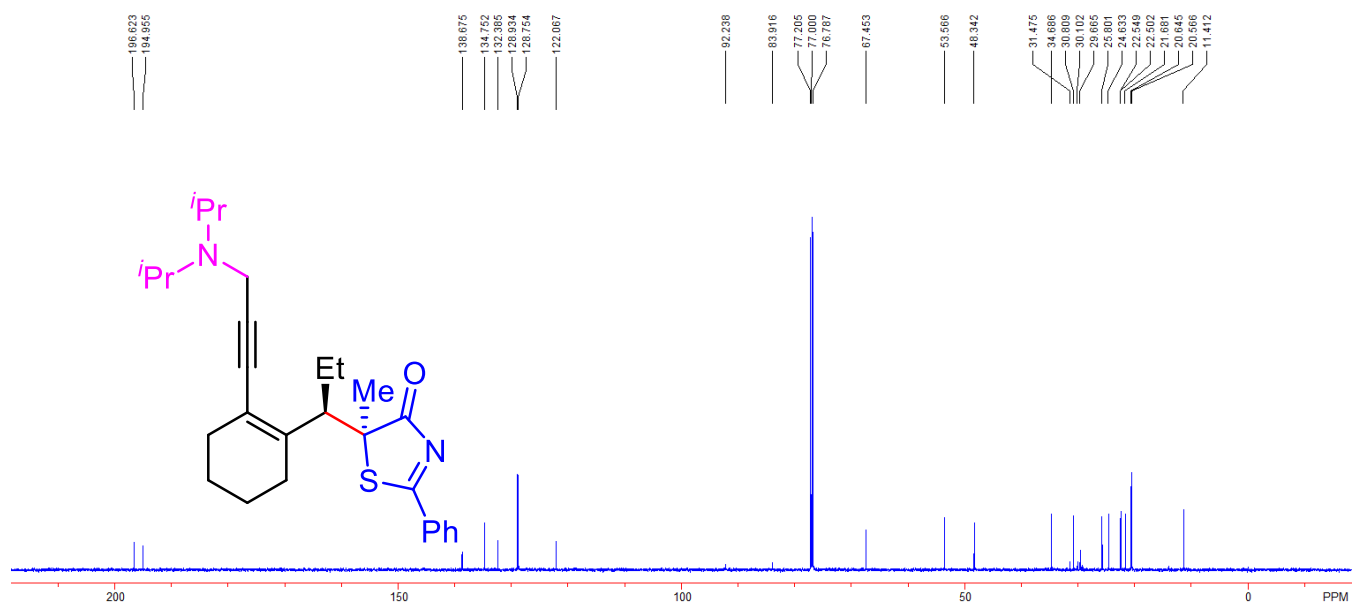

# $^1\text{H}$ and $^{13}\text{C}$ NMR ( $\text{CDCl}_3$ ) Spectra for Compound **5f**

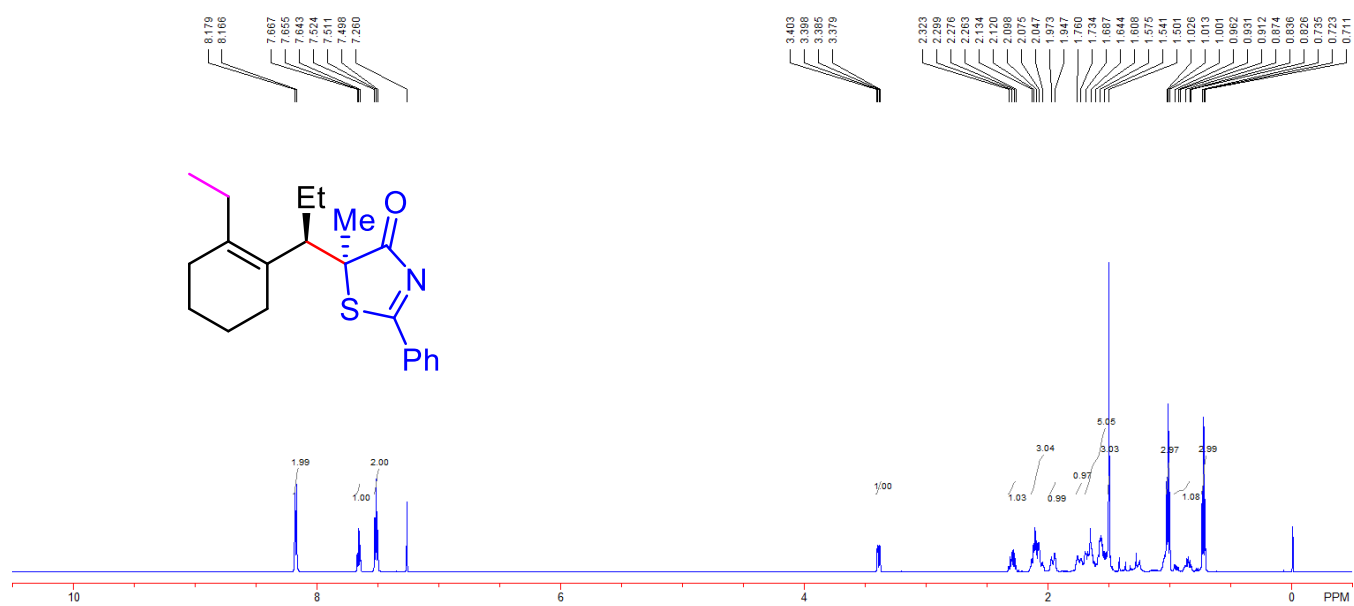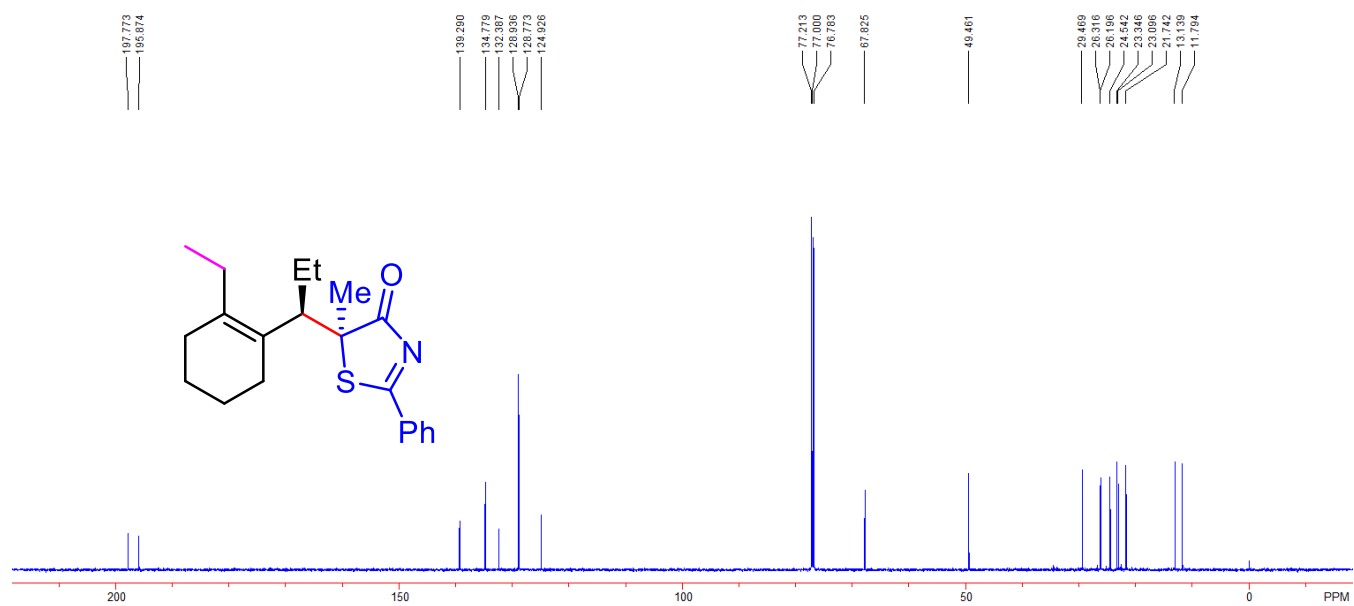

Supplement: d4qo01491j1.pdf [file d4qo01491j1.pdf]
